# Supplementary material for: Synthesis, Molecular Structure, Metabolic Stability and QSAR Studies of a Novel Series of Anticancer N-Acylbenzenesulfonamides
Source: PubMed Central journal article supplement (PMC6332020; doi:10.3390/molecules201019101), 2015-10-21
Supplement: molecules-20-19101-s001.pdf [file molecules-20-19101-s001.pdf]

# Supplementary Materials

**A**

NRS = 3  
CATS2D\_06\_DL = 4  
F07[C-C] = 26 (not shown)

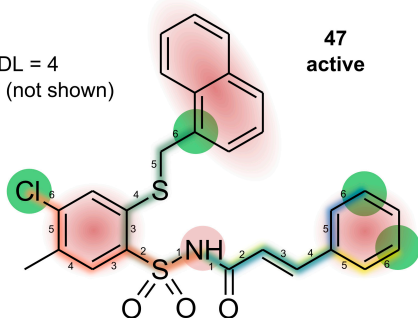

NRS = 1  
CATS2D\_06\_DL = 2  
F07[C-C] = 5

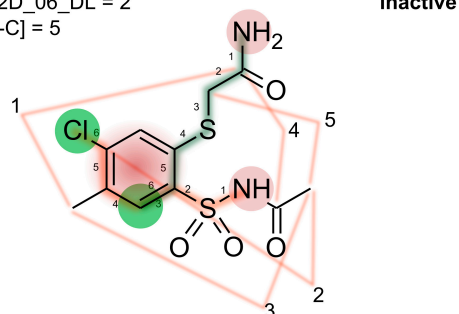

**B**

F08[C-S] = 5  
qpmax = 2.848  
CATS2D\_07\_DA = 0  
ECC = 442

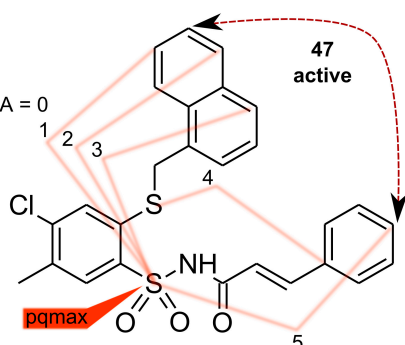

F08[C-S] = 2  
qpmax = 2.845  
CATS2D\_07\_DA = 1  
ECC = 305

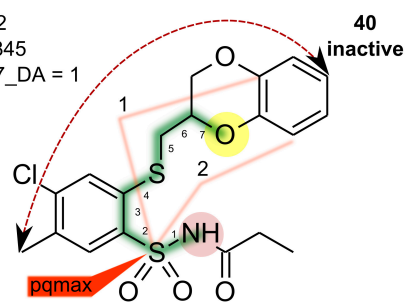

**C**

CATS2D\_03\_LL = 26 (not shown)  
F05[C-S] = 7  
C-024 = 14 (not shown)  
B10[C-S] = 1

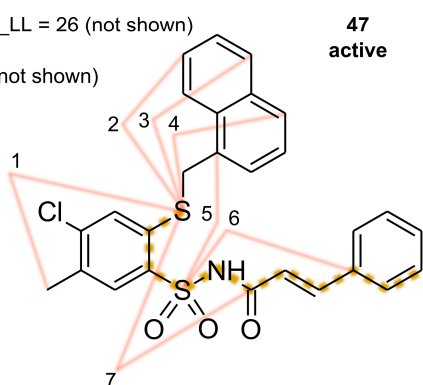

CATS2D\_03\_LL = 5  
F05[C-S] = 3  
C-024 = 2  
B10[C-S] = 0

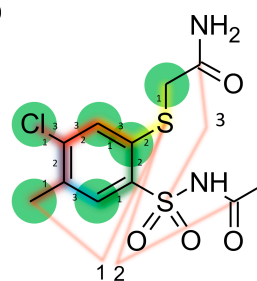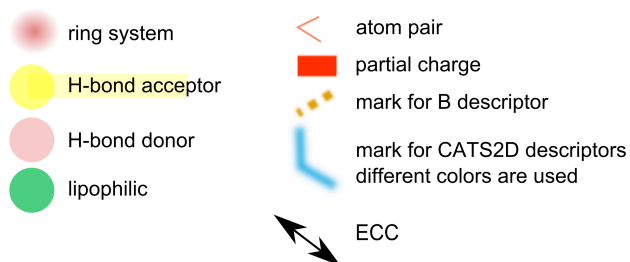

**Figure S1.** Visualization of molecular descriptors values incorporated in QSAR models for MCF-7 (A); HeLa (B); HCT-116 (C) cell lines.

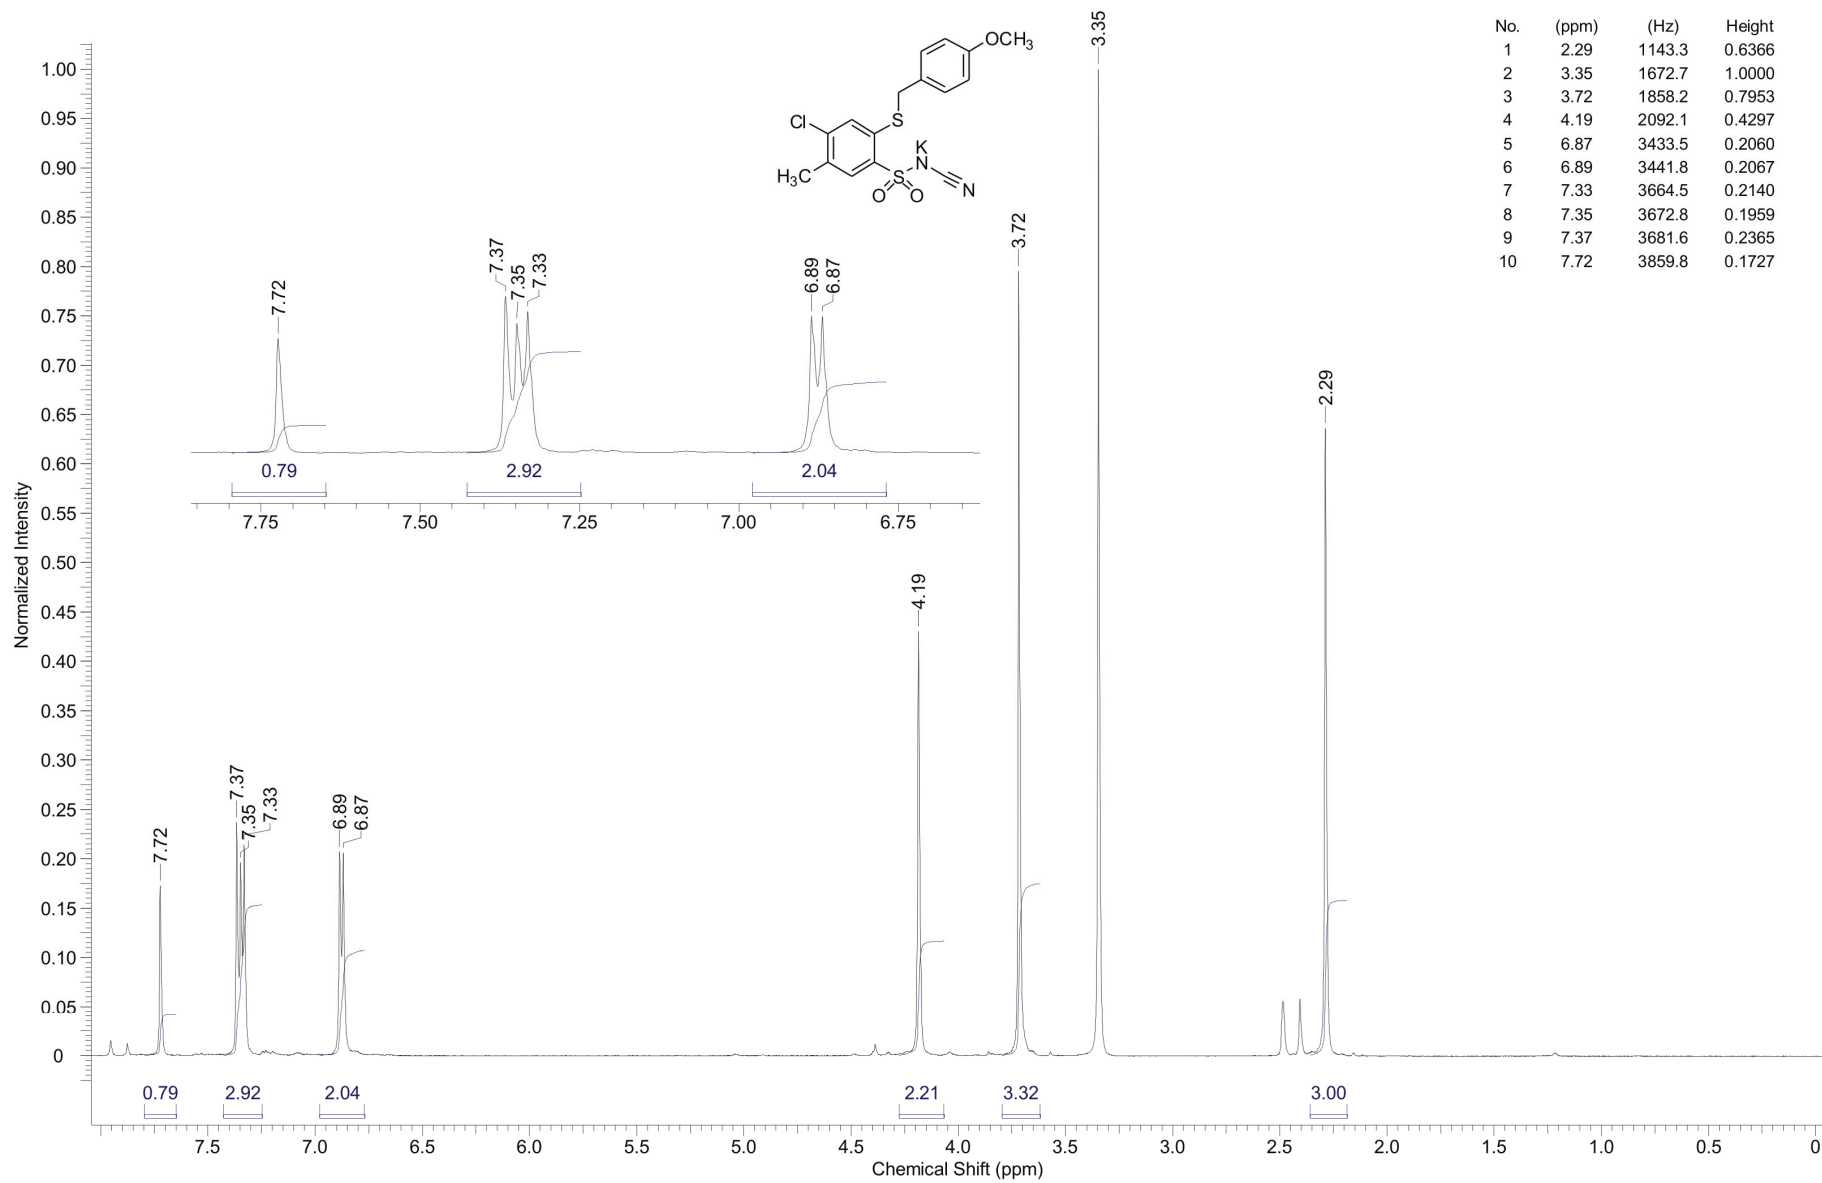

Figure S2.  $^1\text{H-NMR}$  of compound 10 (500 MHz,  $\text{DMSO-}d_6$ ).

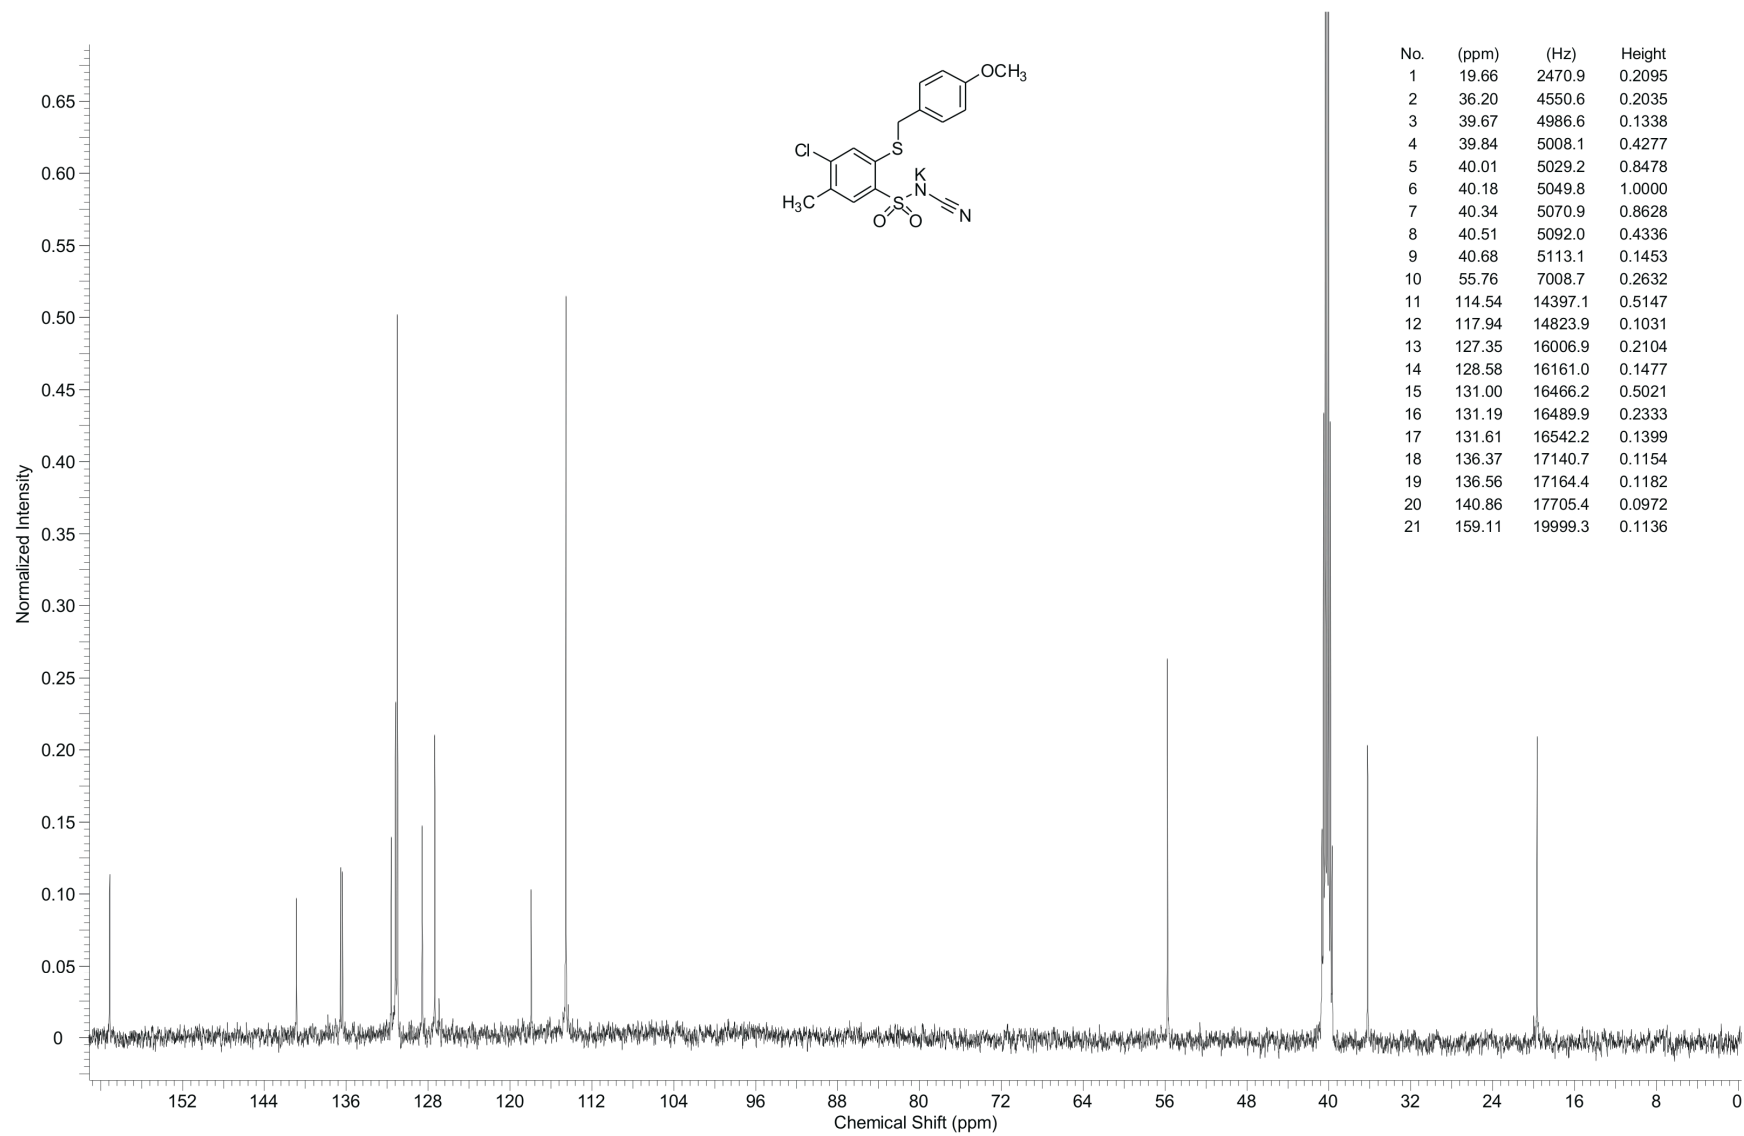

Figure S3.  $^{13}\text{C}$ -NMR of compound 10 (125 MHz,  $\text{DMSO-}d_6$ ).

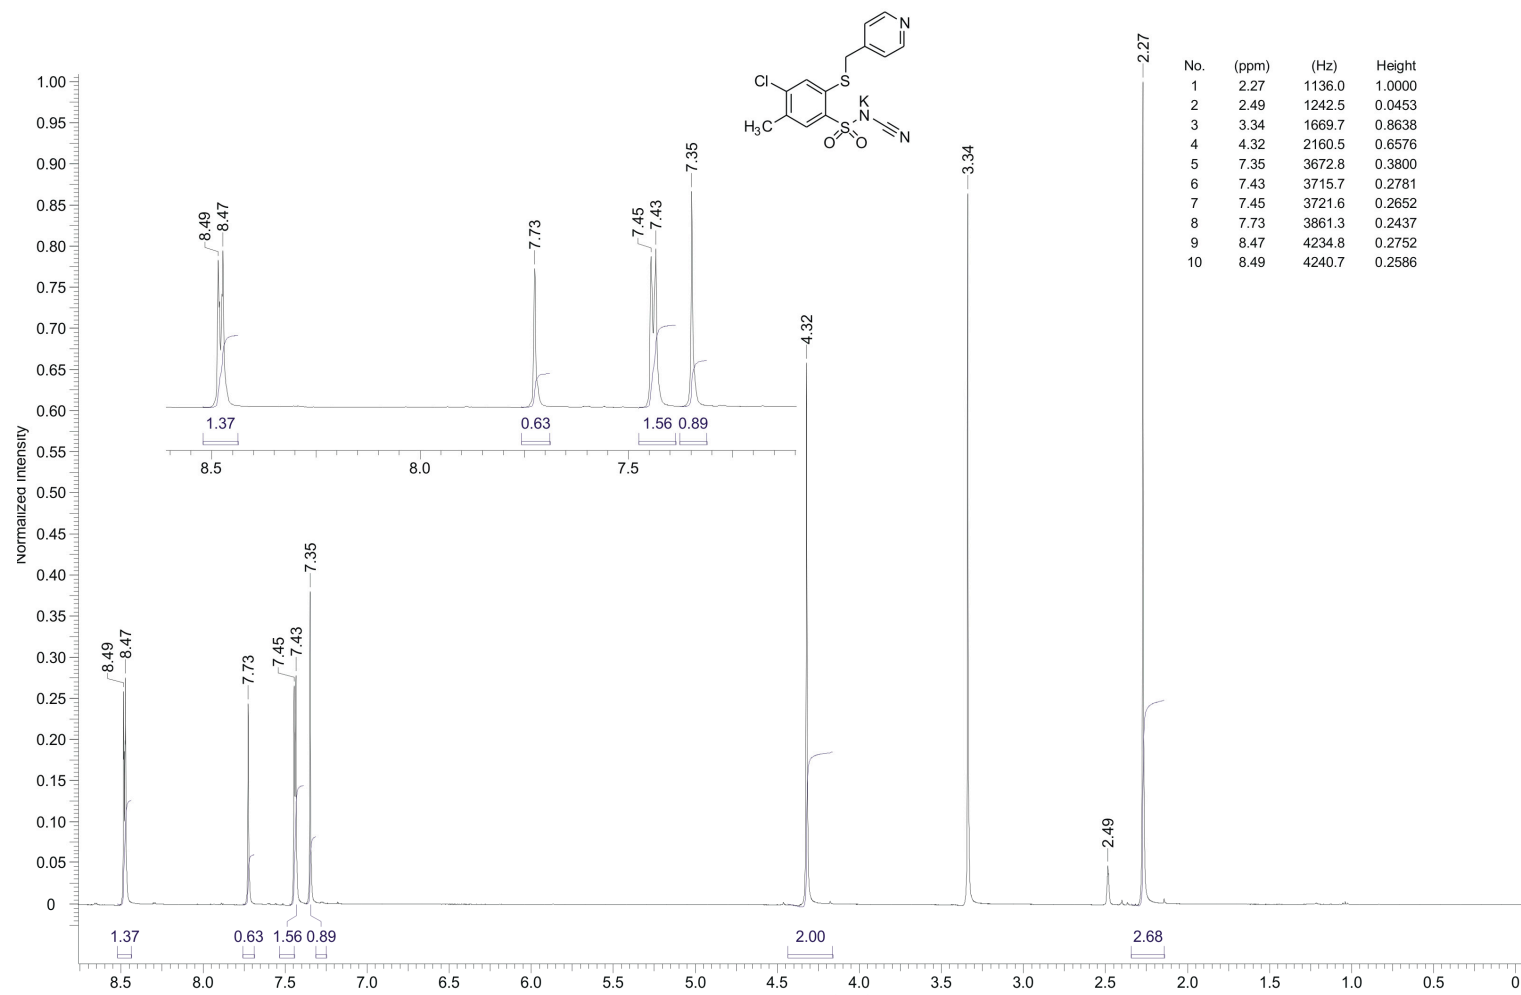

Figure S4.  $^1\text{H-NMR}$  of compound 11 (500 MHz,  $\text{DMSO-}d_6$ ).

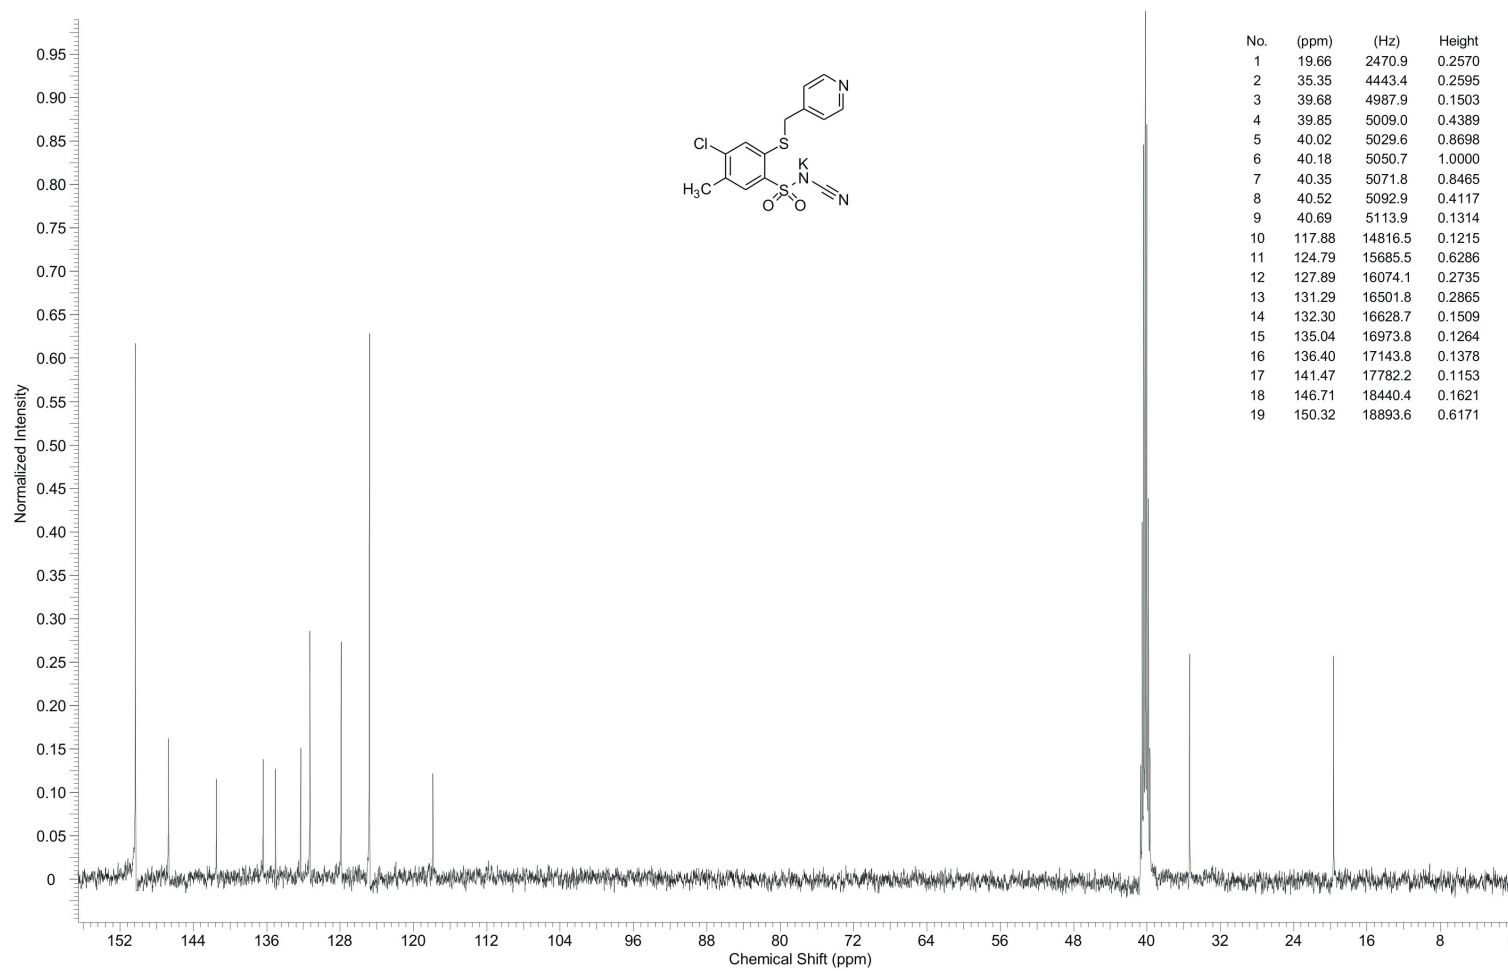

Figure S5.  $^{13}\text{C}$ -NMR of compound 11 (125 MHz DMSO- $d_6$ ).

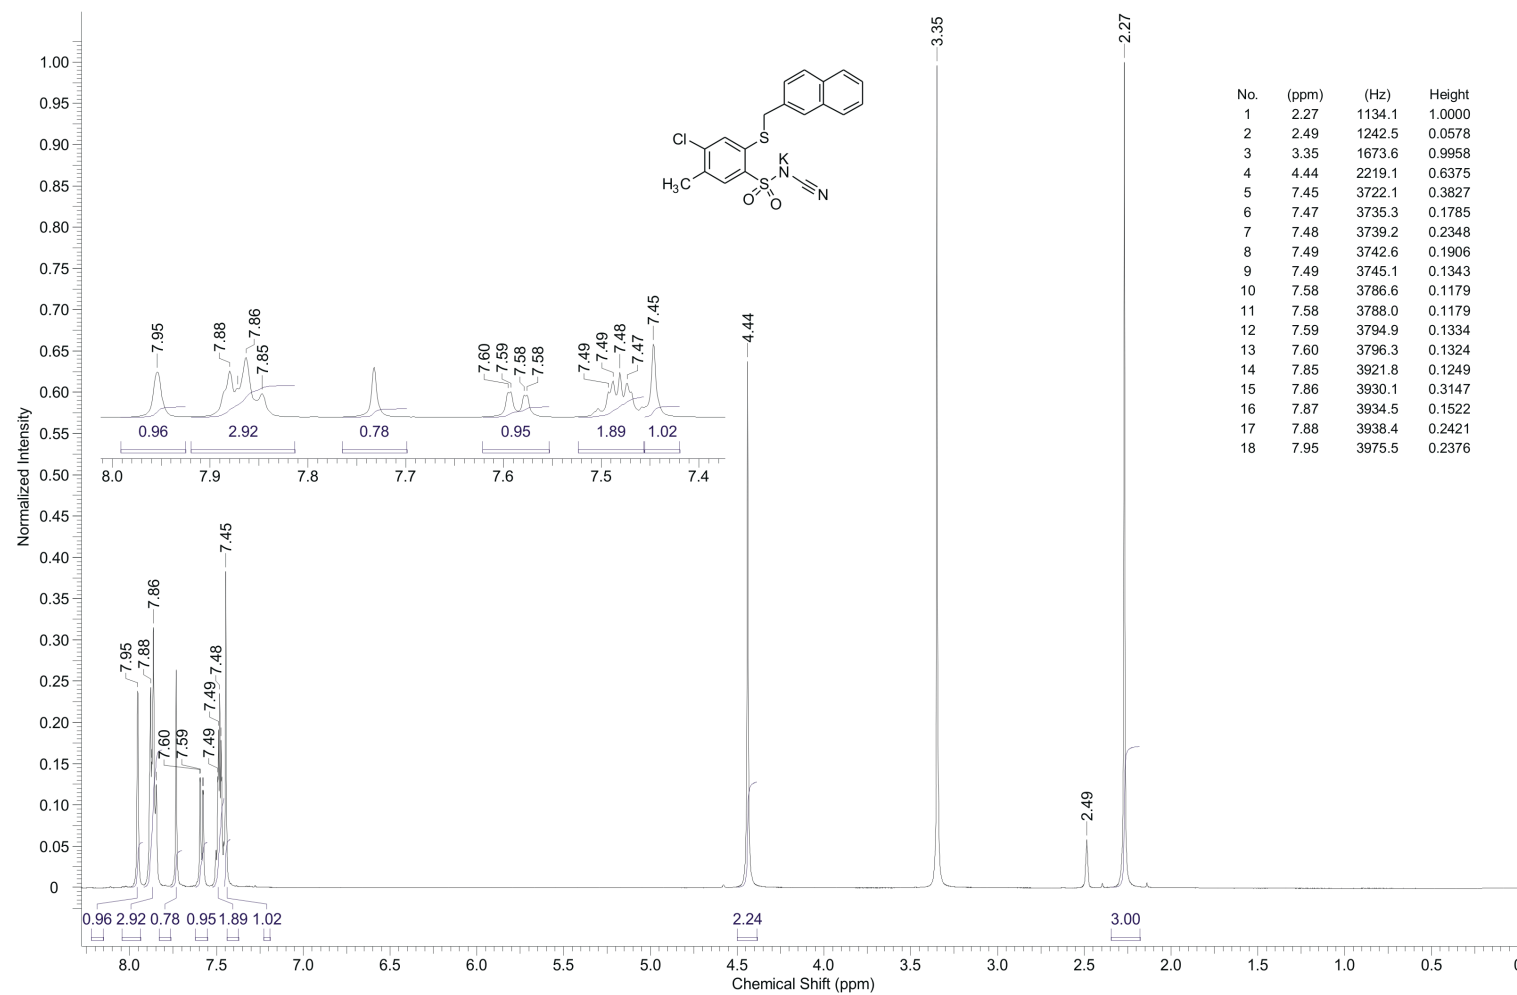

Figure S6.  $^1\text{H-NMR}$  of compound 13 (500 MHz,  $\text{DMSO-}d_6$ ).

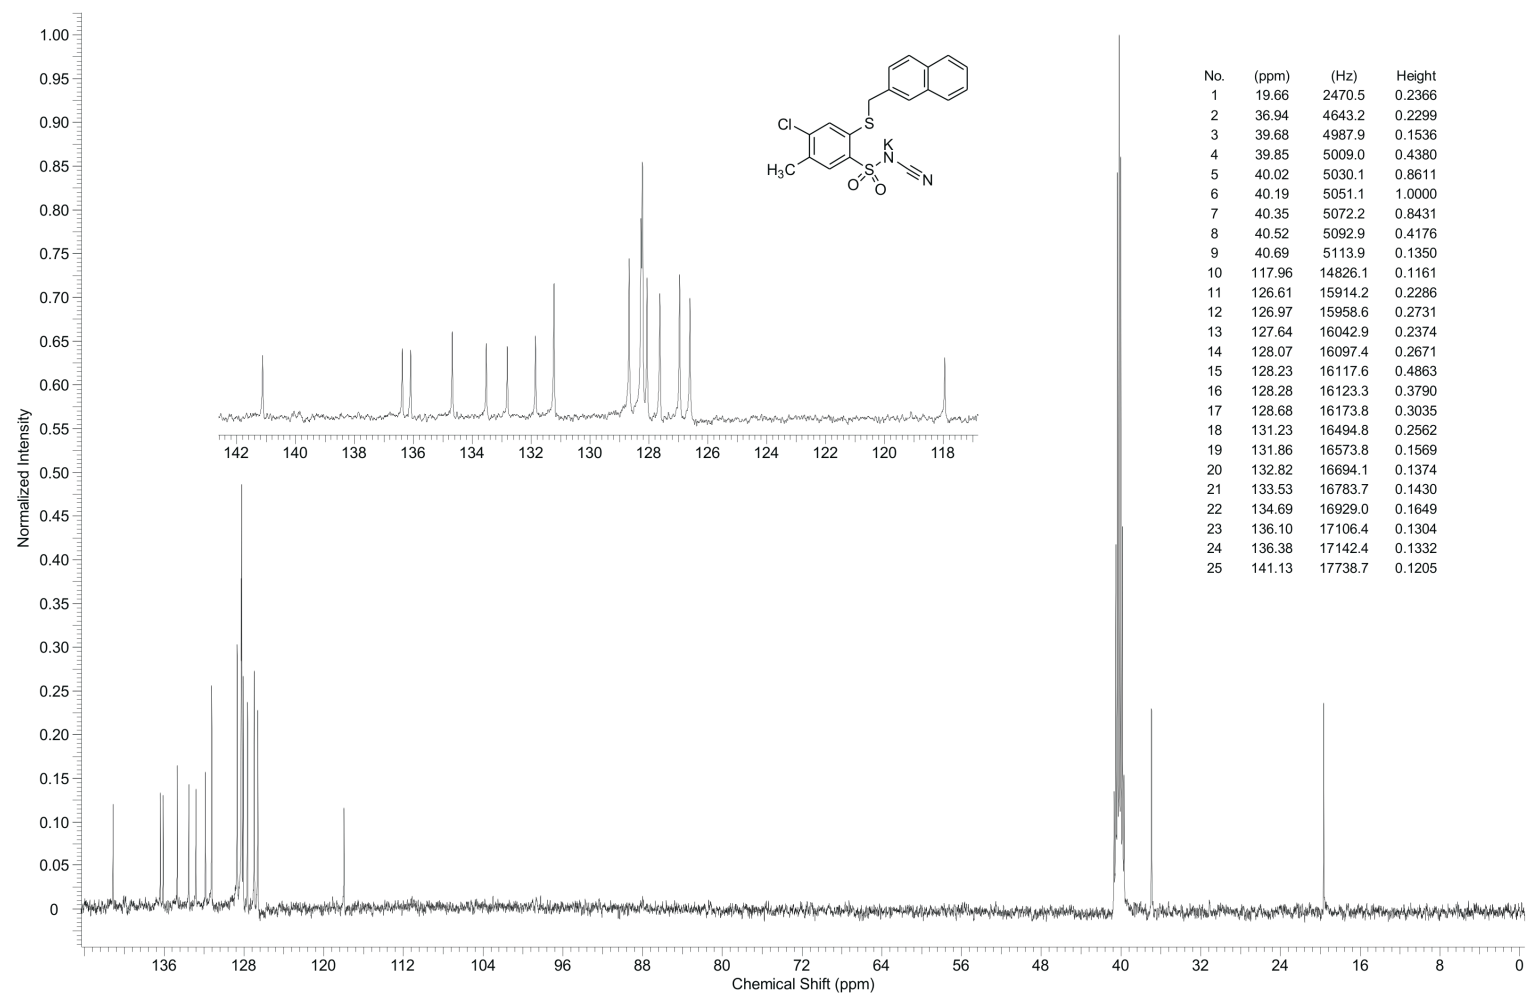

Figure S7.  $^{13}\text{C}$ -NMR of compound 13 (125 MHz,  $\text{DMSO-}d_6$ ).

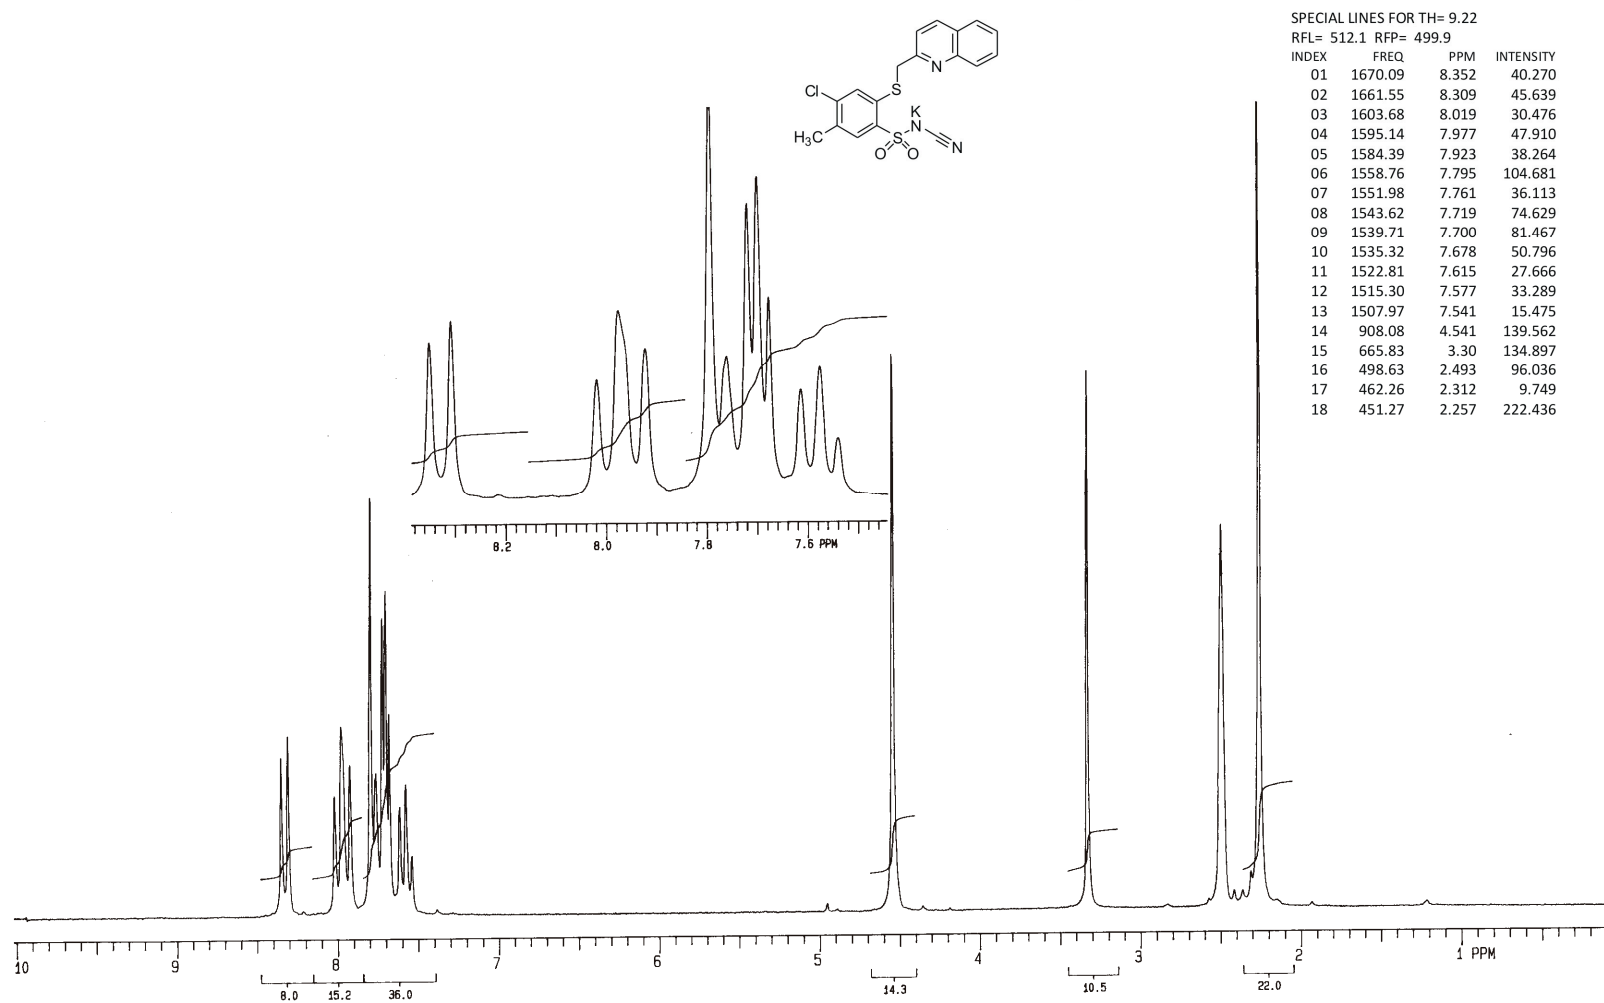

Figure S8.  $^1\text{H-NMR}$  of compound 14 (200 MHz,  $\text{DMSO-}d_6$ ).



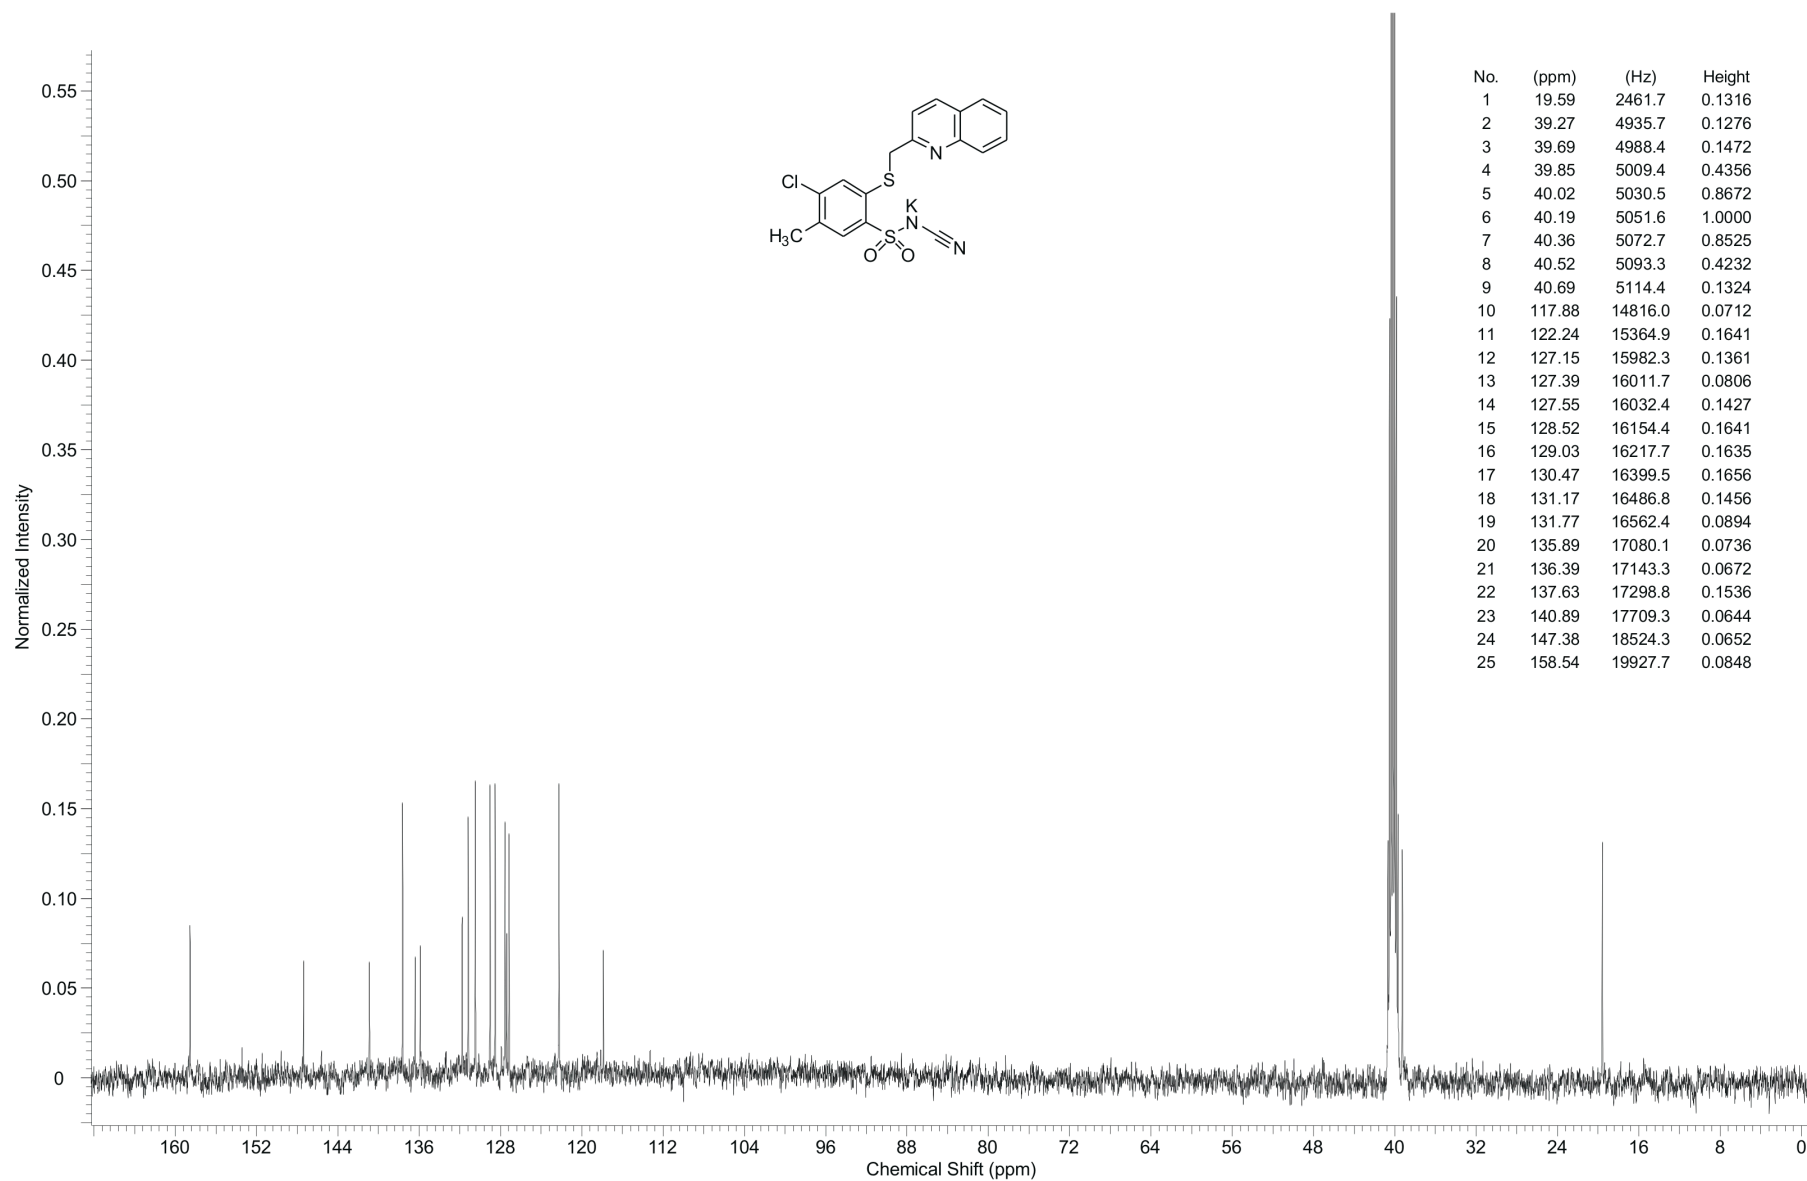

Figure S9.  $^{13}\text{C}$ -NMR of compound 14 (125 MHz,  $\text{DMSO-}d_6$ ).

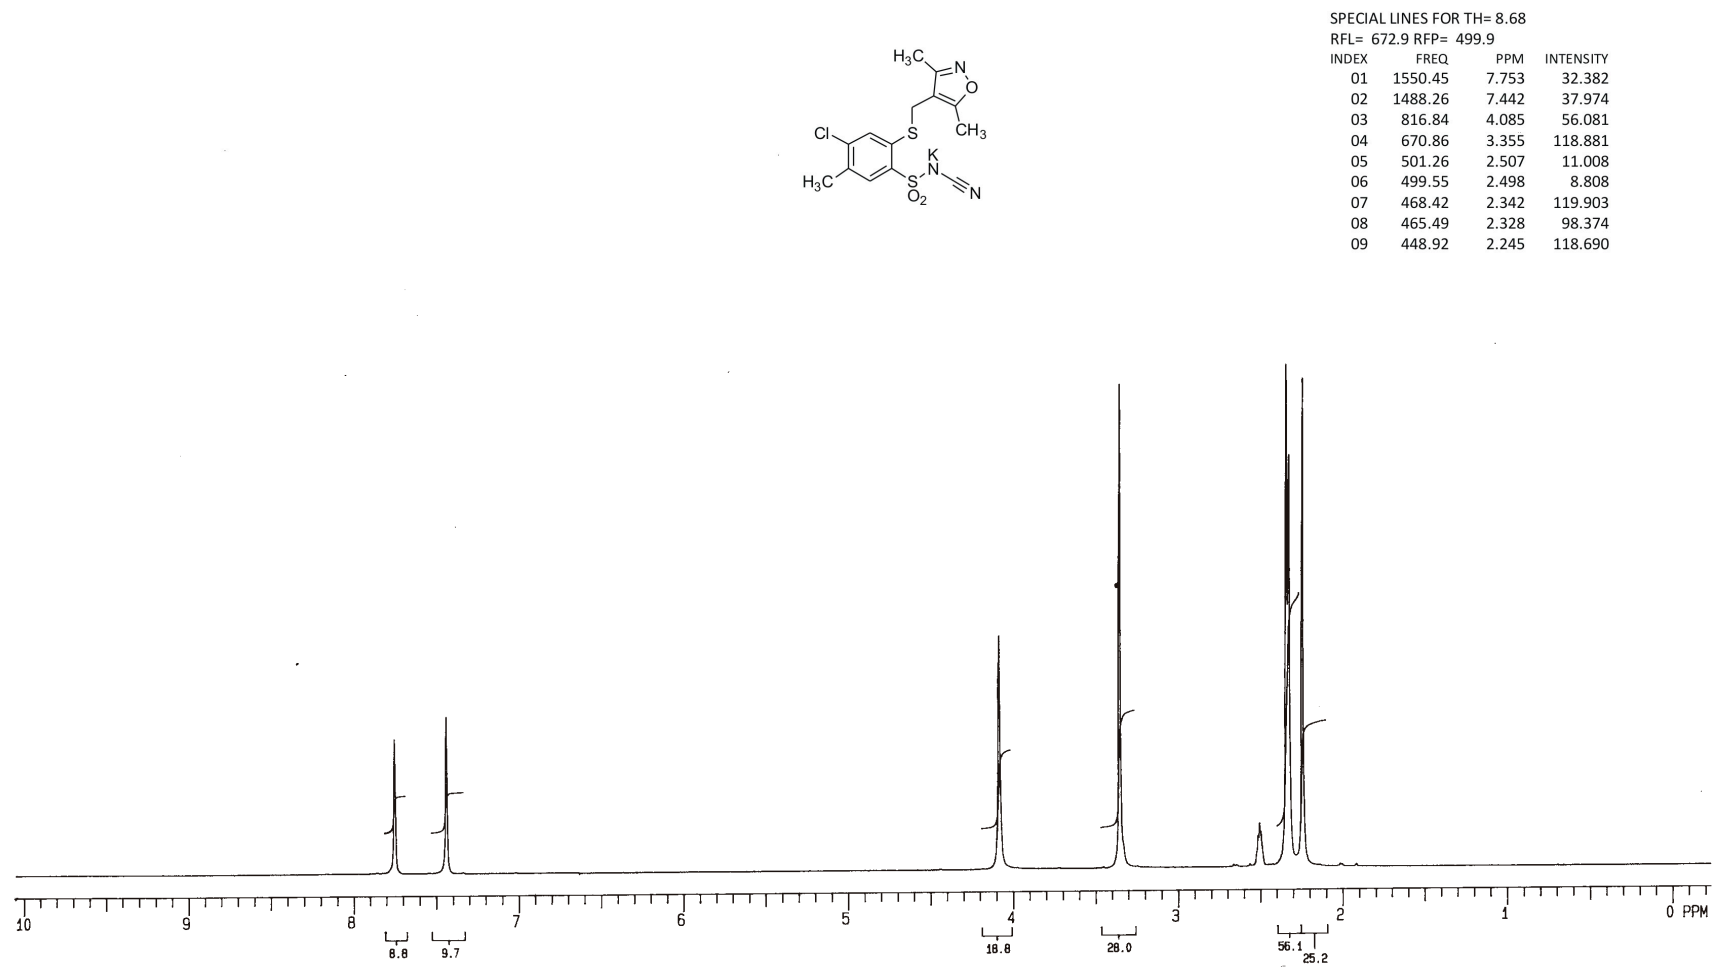

Figure S10.  $^1\text{H-NMR}$  of compound 17 (200 MHz,  $\text{DMSO-}d_6$ ).

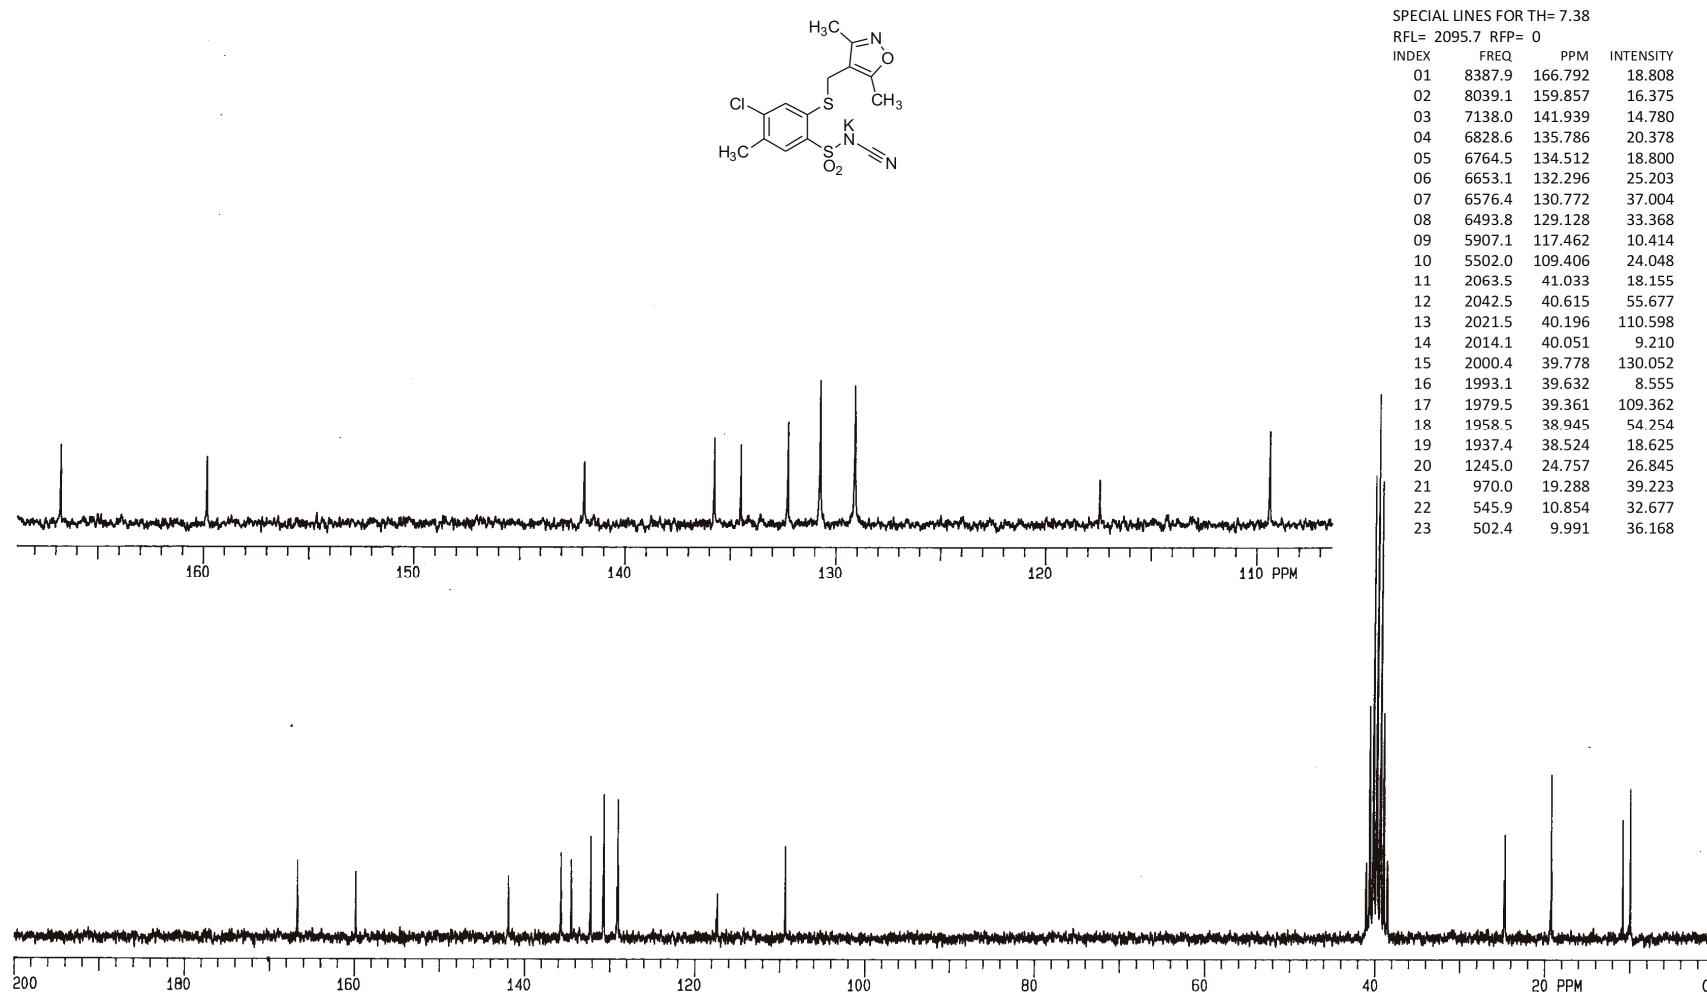

Figure S11.  $^{13}\text{C}$ -NMR of compound 17 (50 MHz,  $\text{DMSO-}d_6$ ).

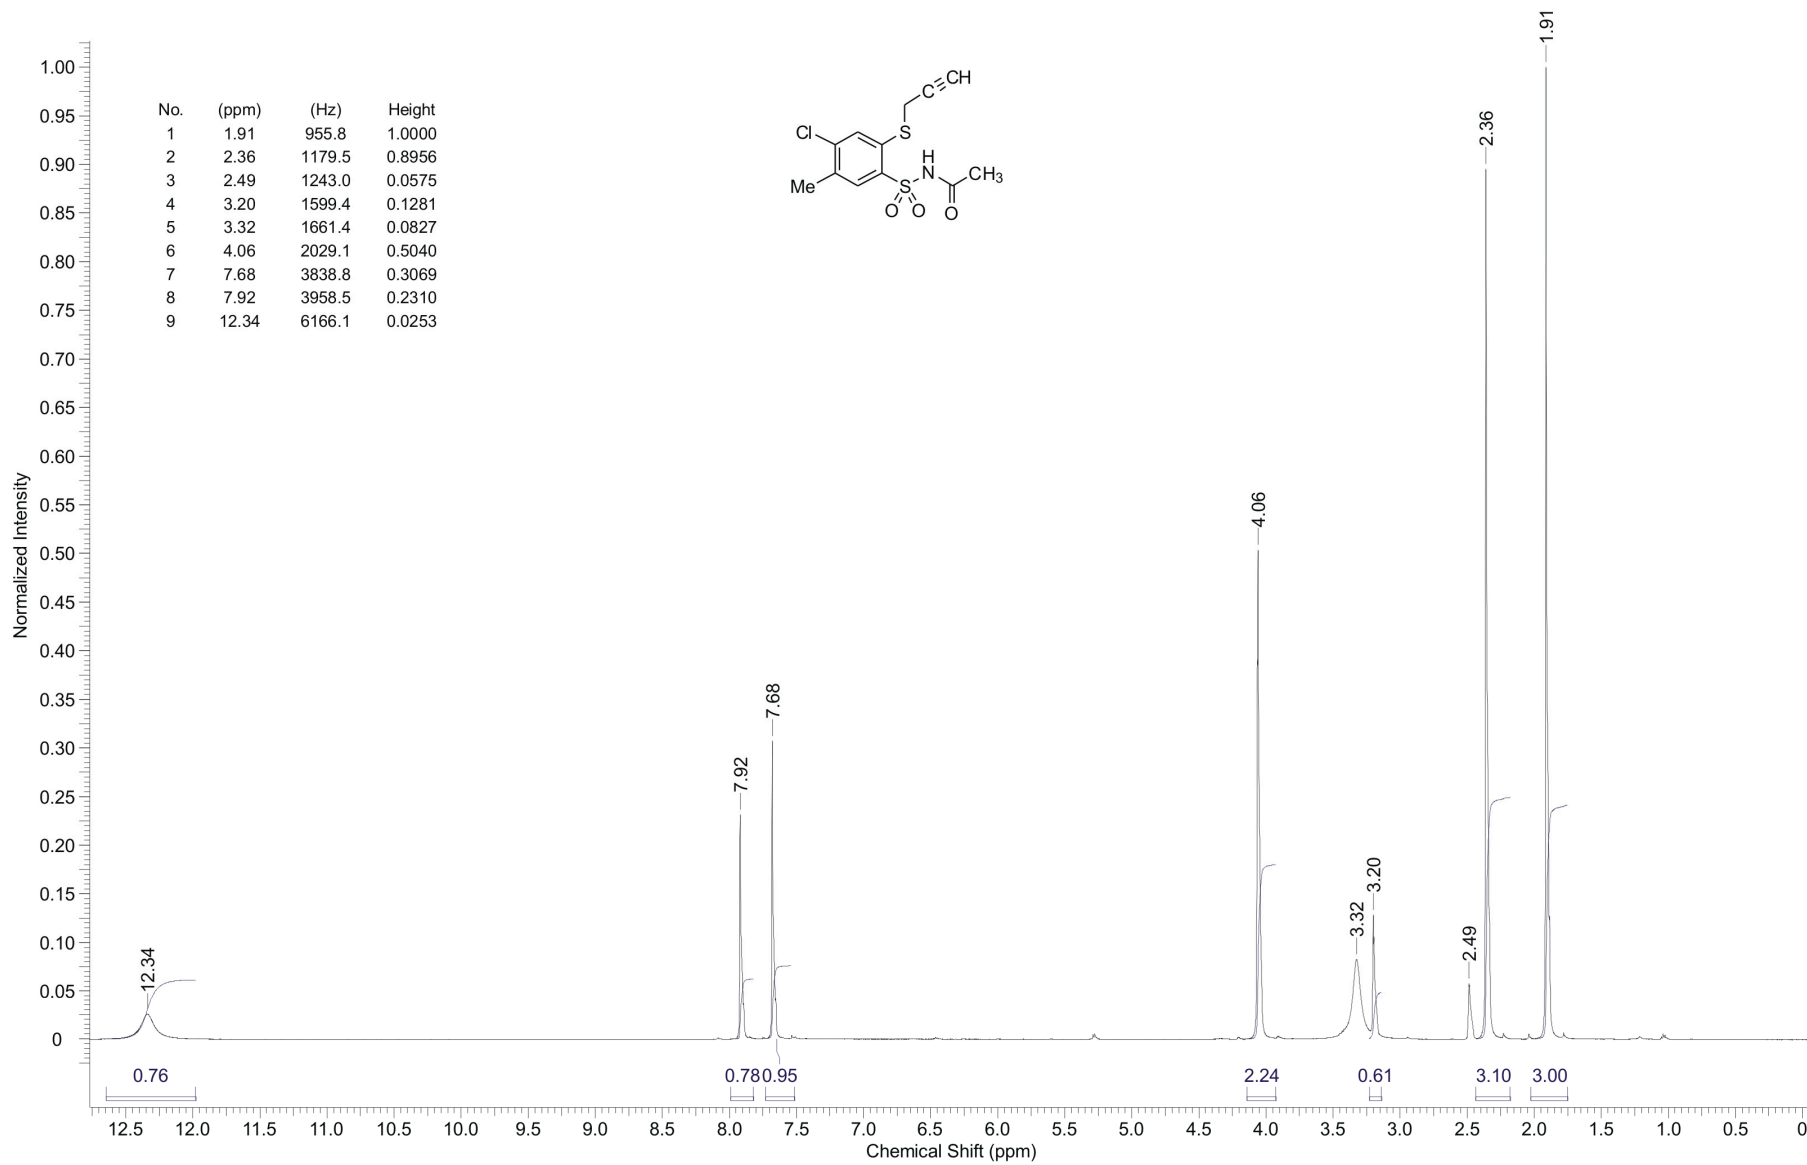

Figure S12.  $^1\text{H}$ -NMR of compound 19 (500 MHz,  $\text{DMSO-}d_6$ ).

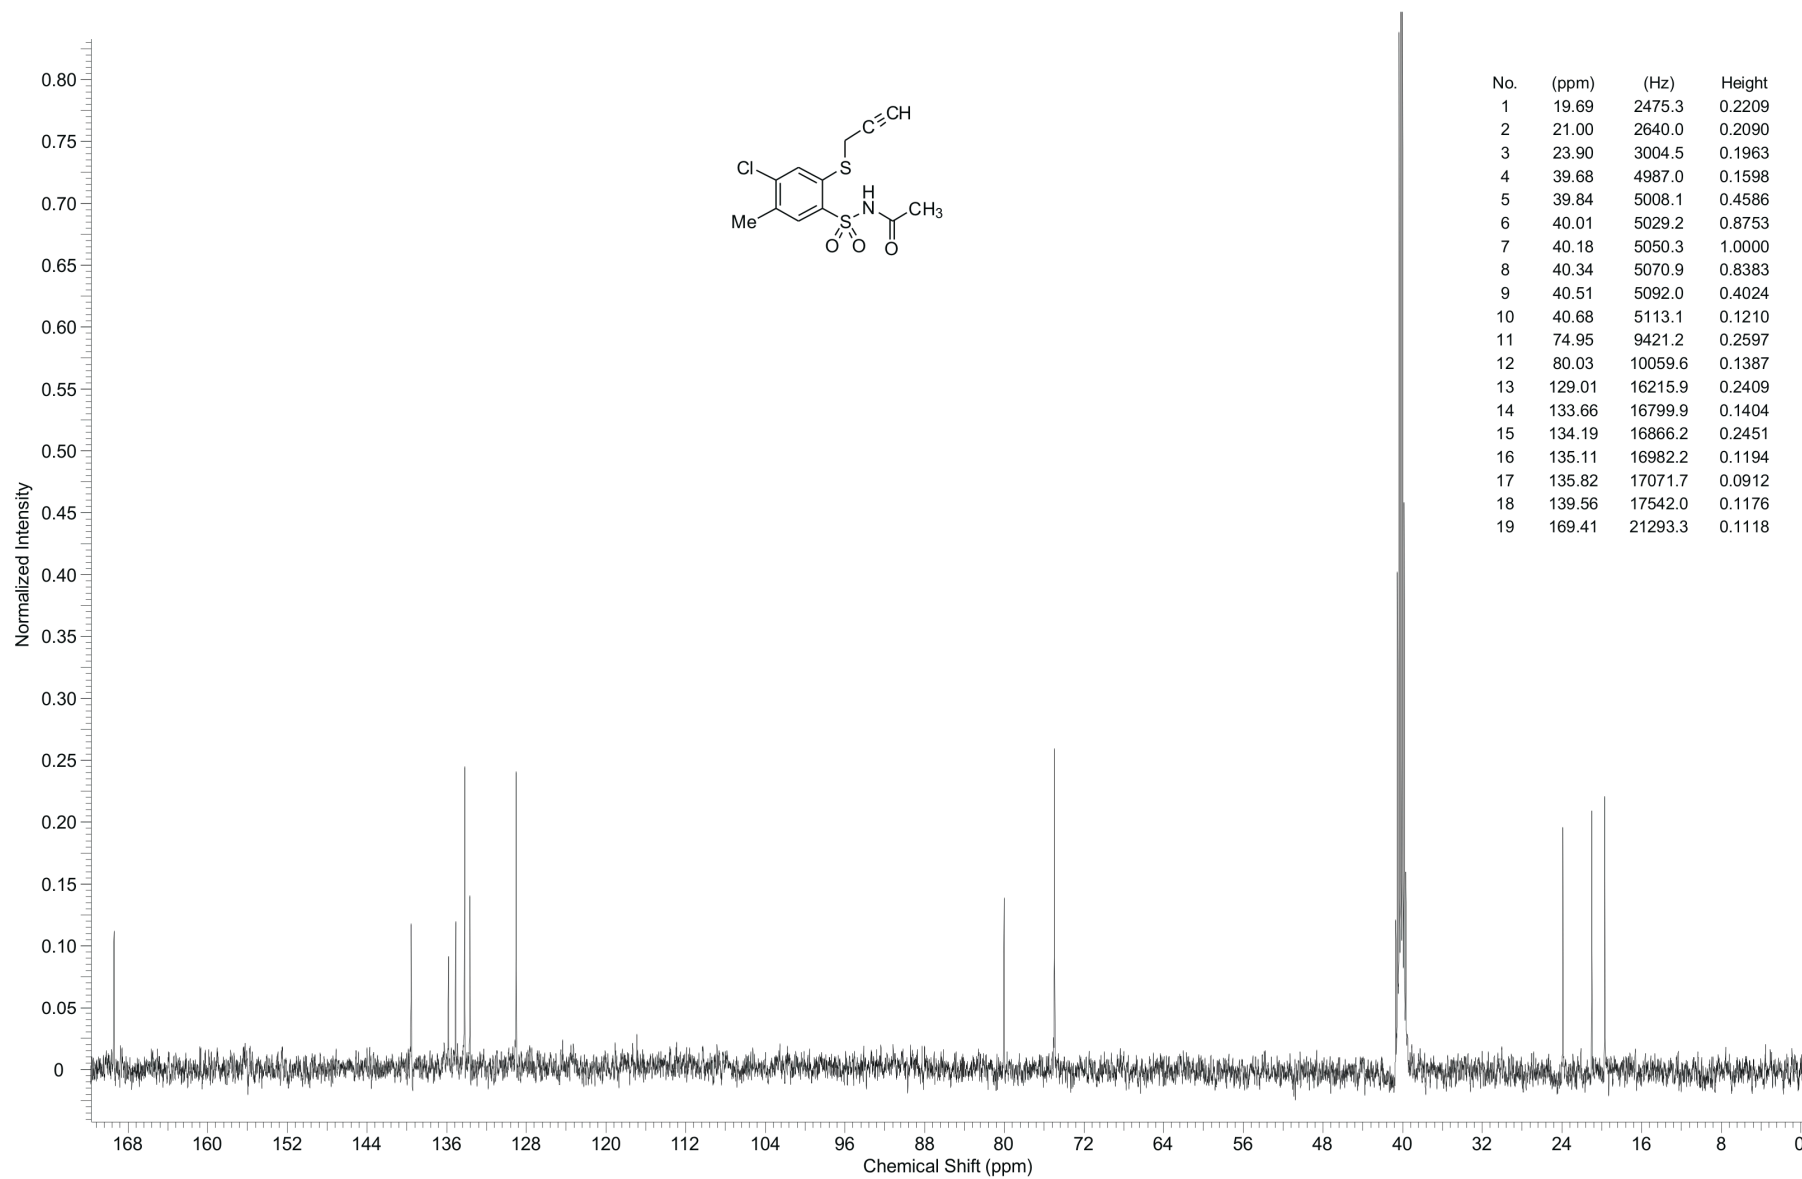

Figure S13.  $^{13}\text{C}$ -NMR of compound 19 (125 MHz,  $\text{DMSO-}d_6$ ).

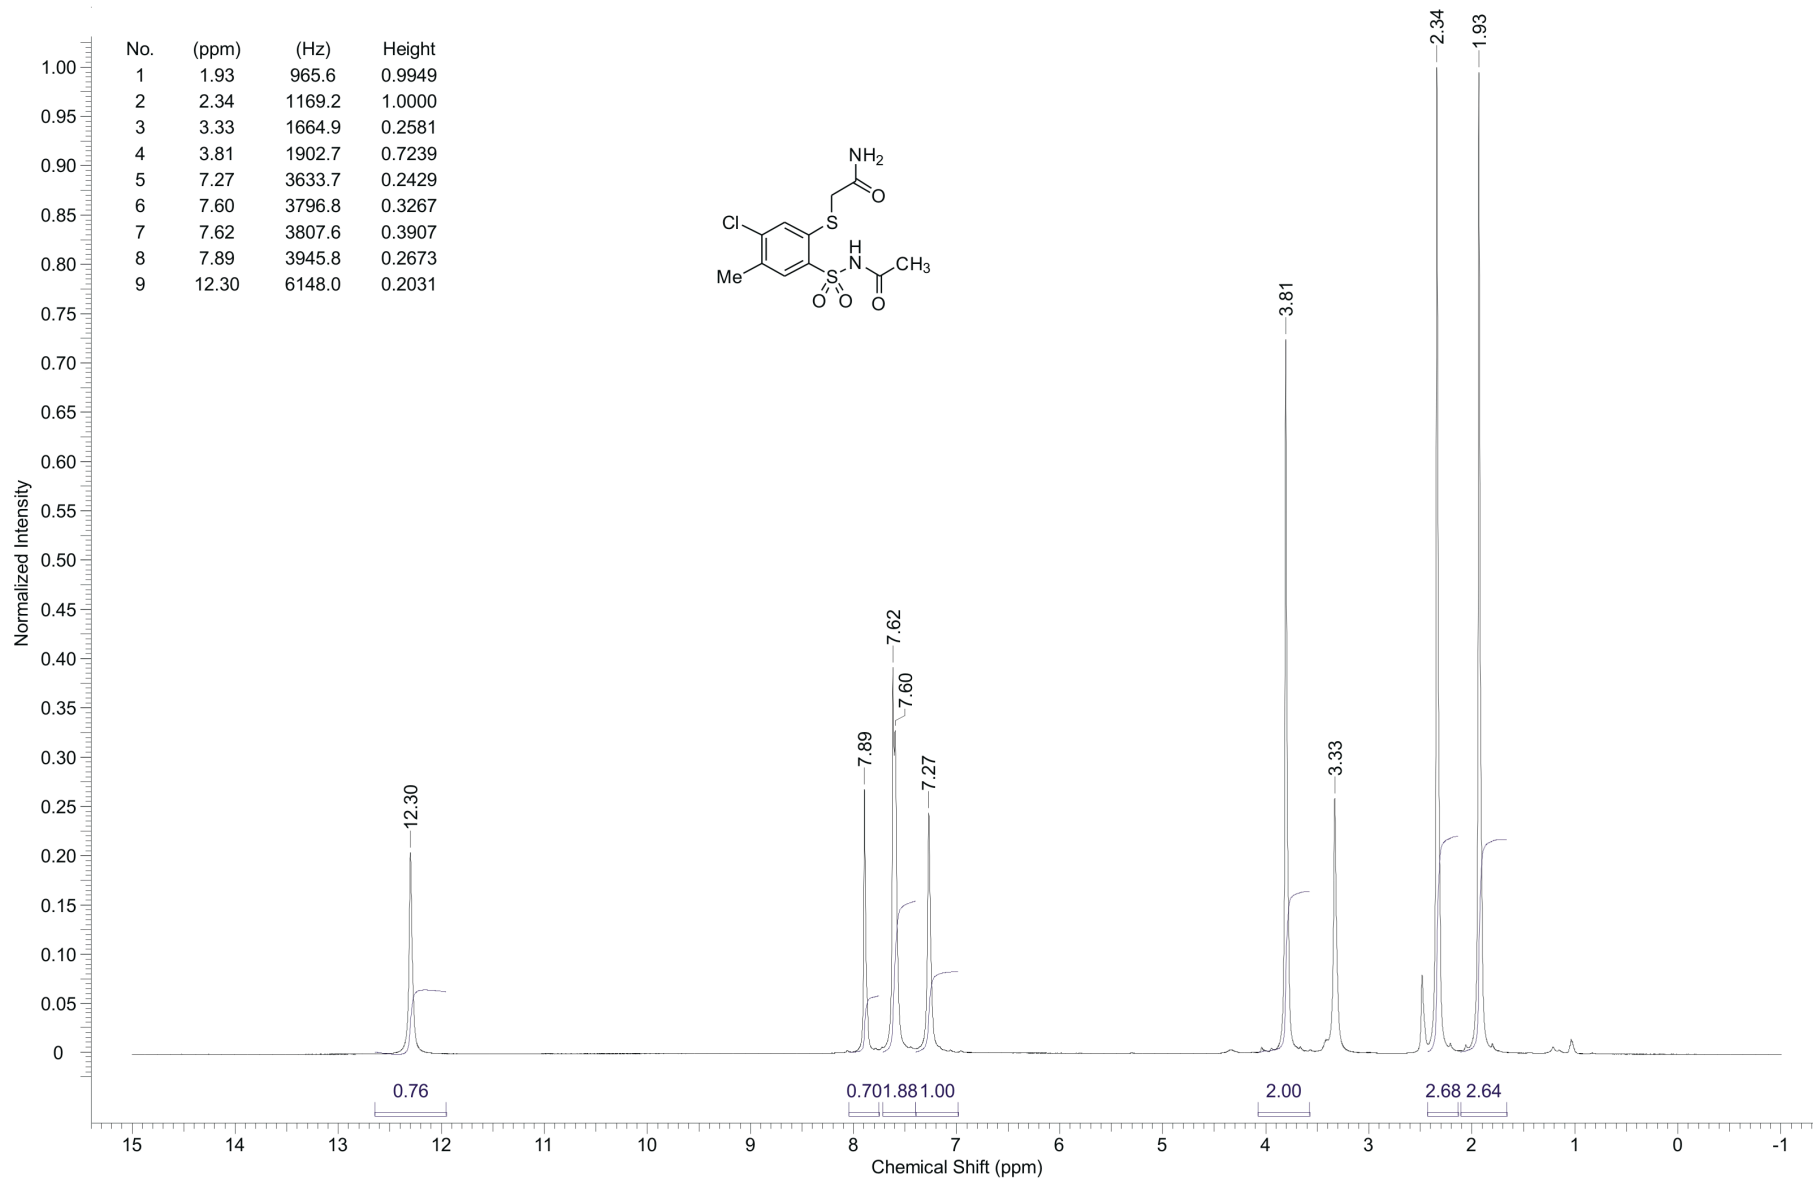

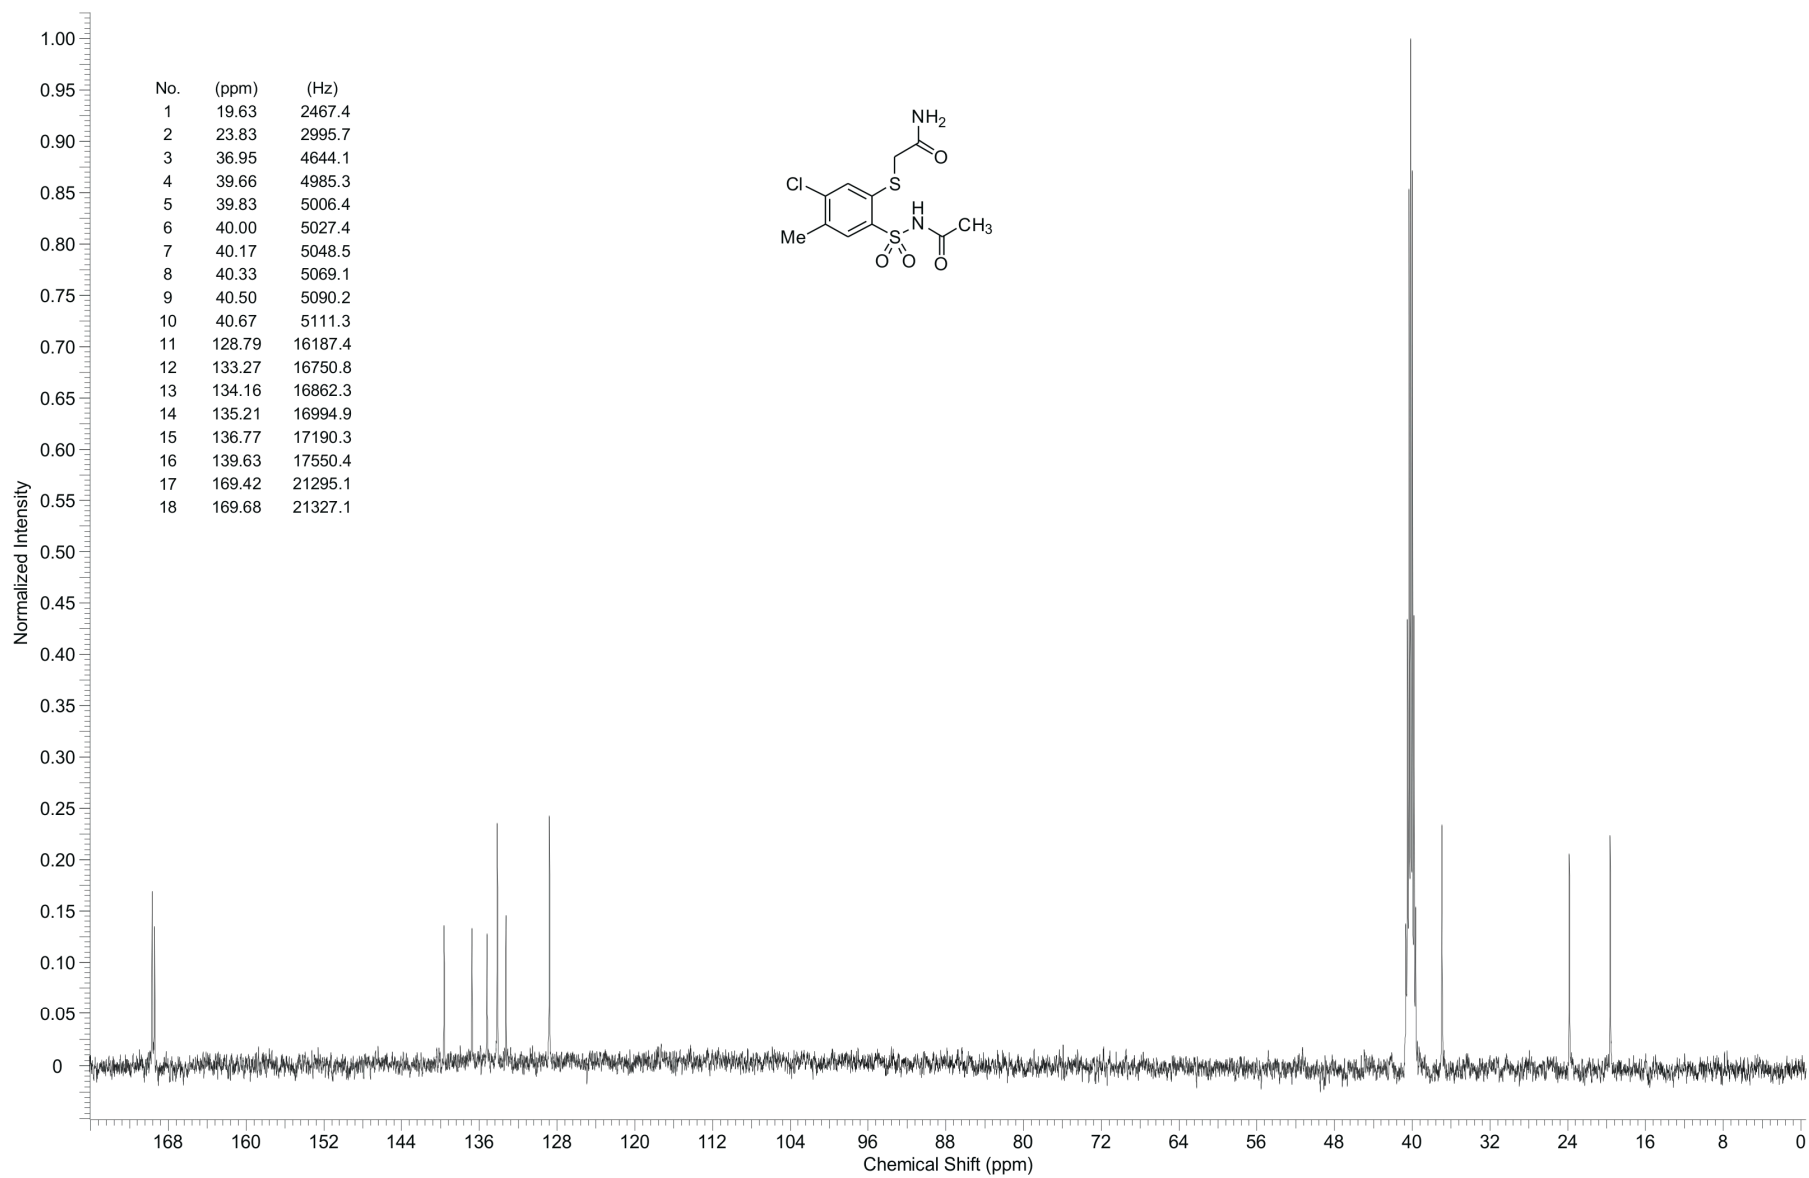

**Figure S15.** <sup>13</sup>C-NMR of compound **20** (125 MHz, DMSO-*d*<sub>6</sub>).

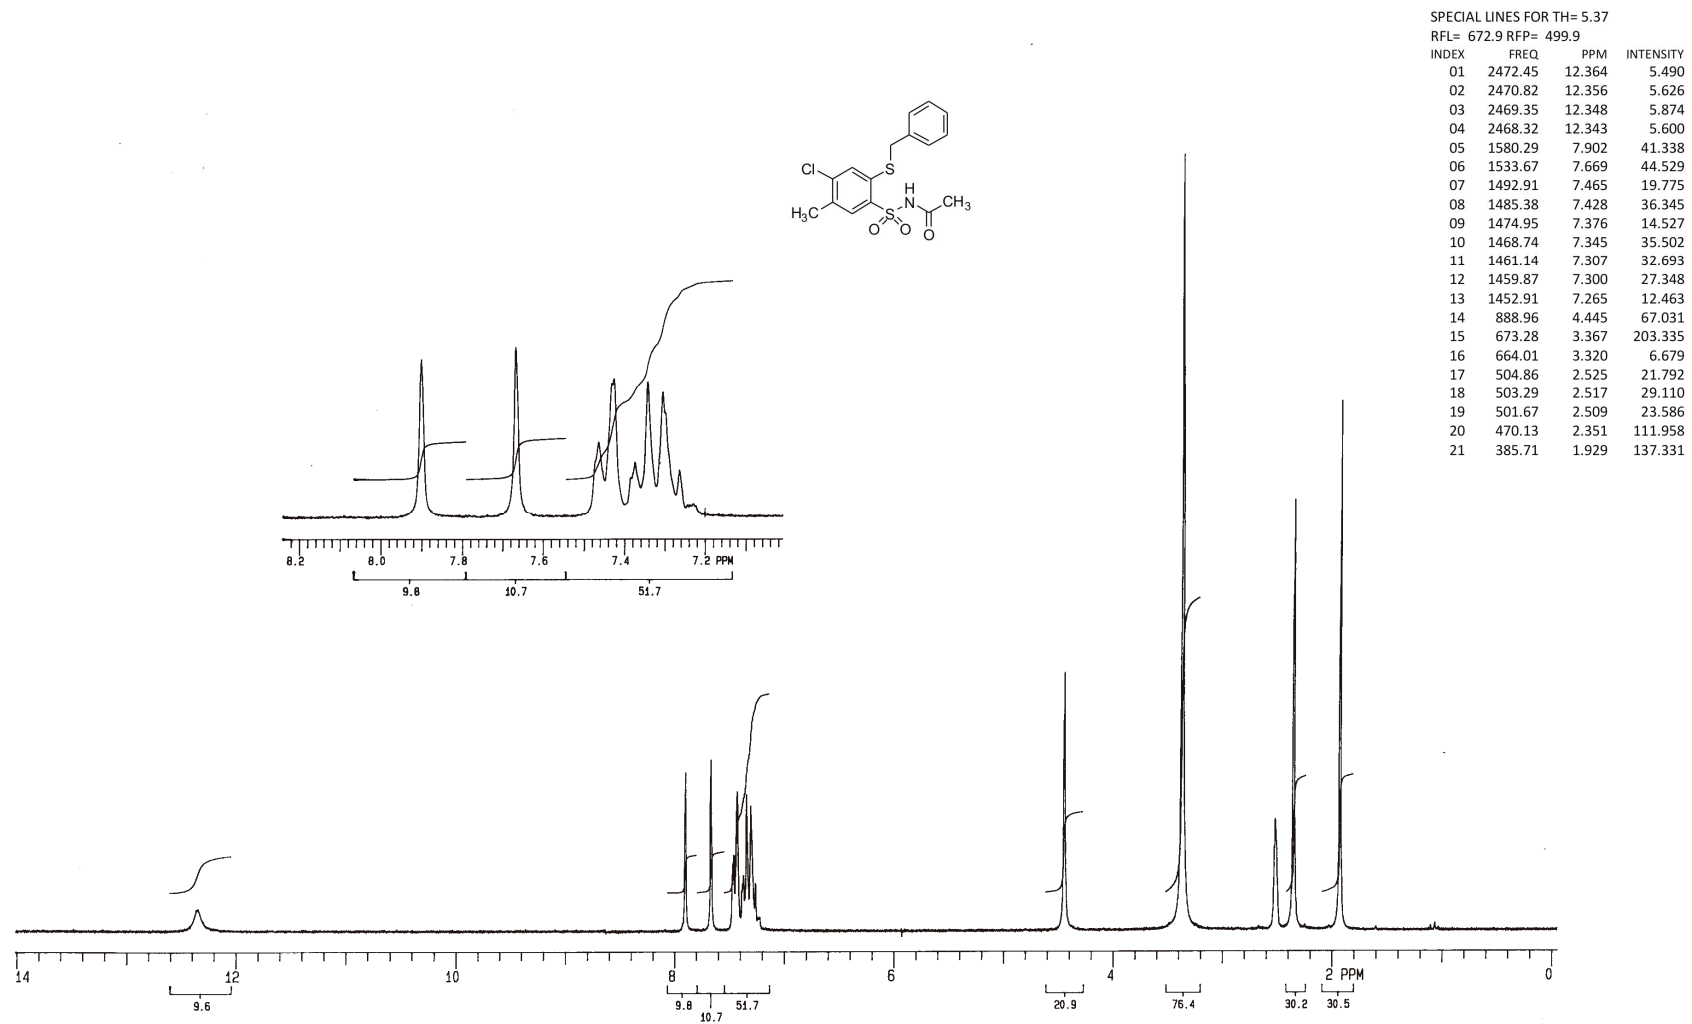

Figure S16.  $^1\text{H-NMR}$  of compound **21** (200 MHz,  $\text{DMSO-}d_6$ ).



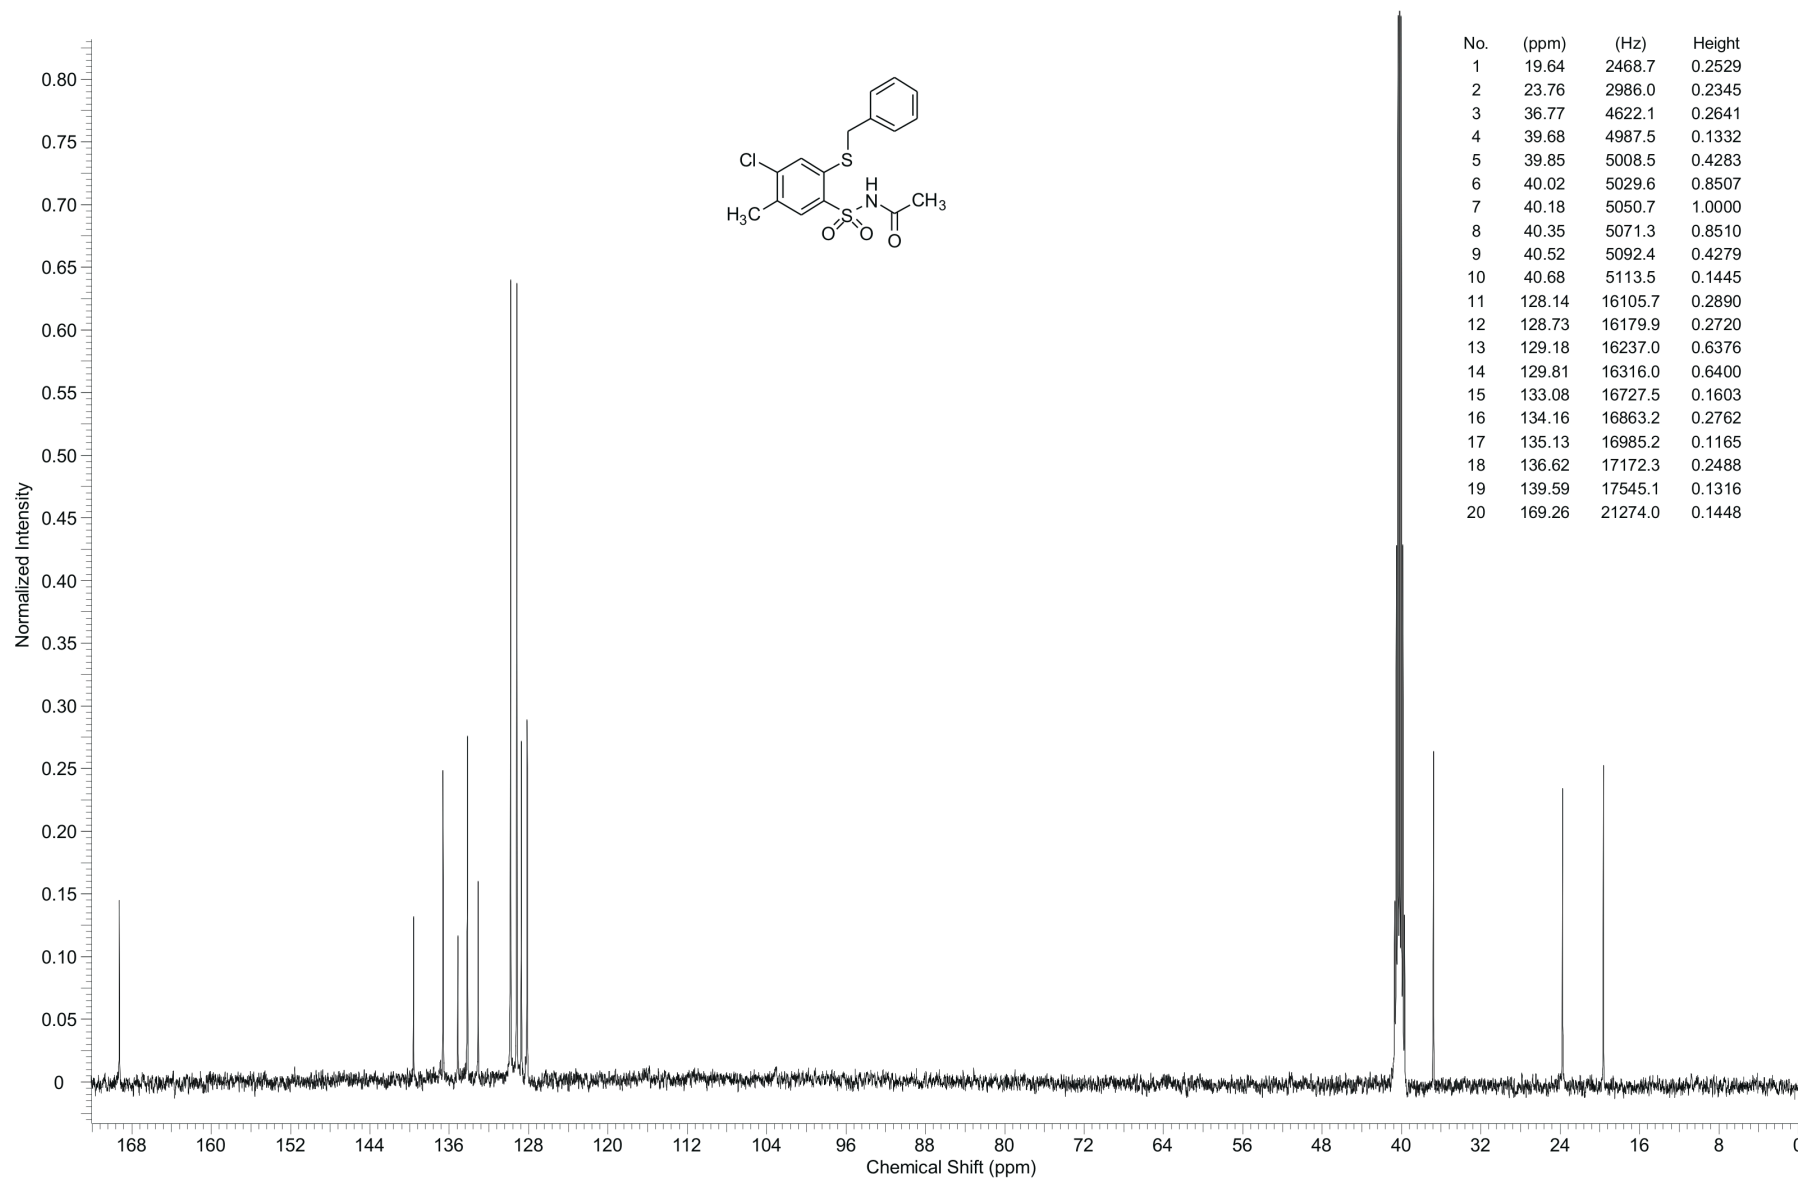

Figure S17.  $^{13}\text{C}$ -NMR of compound **21** (125 MHz,  $\text{DMSO-}d_6$ ).

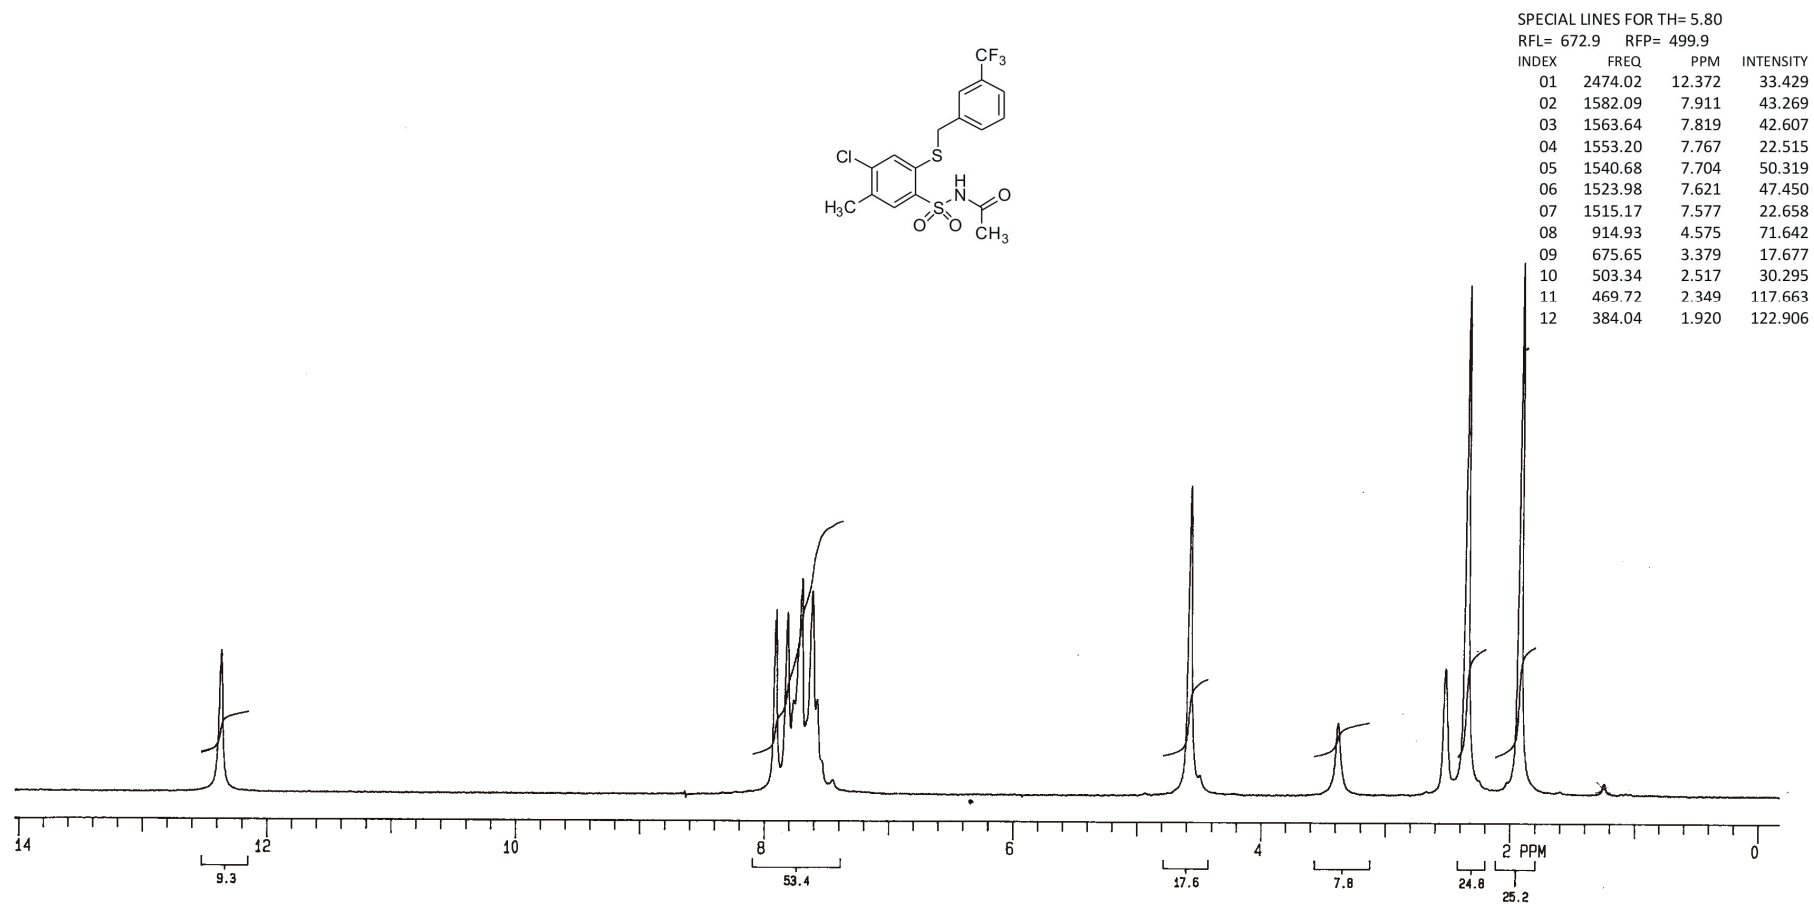

Figure S18.  $^1\text{H-NMR}$  of compound **22** (200 MHz,  $\text{DMSO-}d_6$ ).

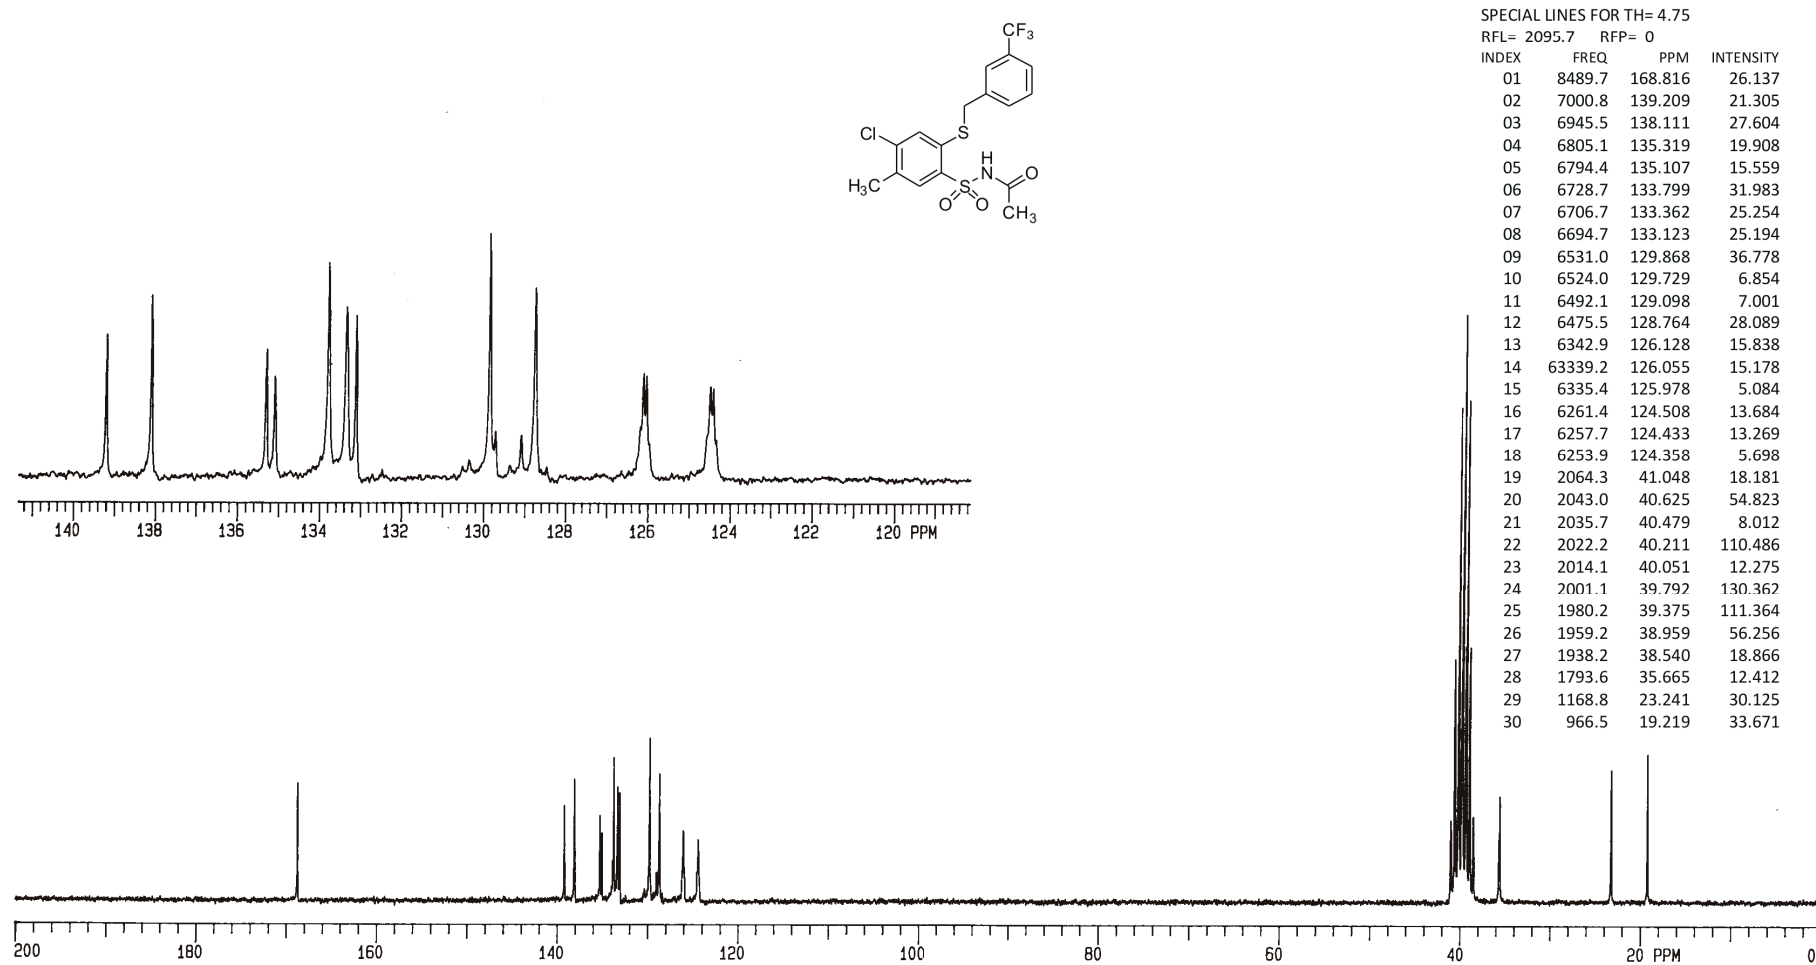

Figure S19.  $^{13}\text{C}$ -NMR of compound **22** (50 MHz,  $\text{DMSO-}d_6$ ).

SPECIAL LINES FOR TH= 9.35

RFL= 672.9 RFP= 499.9

| INDEX | FREQ    | PPM    | INTENSITY |
|-------|---------|--------|-----------|
| 01    | 2468.32 | 12.346 | 26.951    |
| 02    | 1581.45 | 7.808  | 51.920    |
| 03    | 1535.20 | 7.676  | 54.794    |
| 04    | 1496.50 | 7.489  | 29.862    |
| 05    | 1488.22 | 7.442  | 108.825   |
| 06    | 1484.33 | 7.423  | 95.347    |
| 07    | 1477.83 | 7.390  | 17.035    |
| 08    | 1475.93 | 7.381  | 19.267    |
| 09    | 891.51  | 4.458  | 85.462    |
| 10    | 671.94  | 3.360  | 67.694    |
| 11    | 504.40  | 2.522  | 30.415    |
| 12    | 502.88  | 2.515  | 31.683    |
| 13    | 470.77  | 2.354  | 139.716   |
| 14    | 385.25  | 1.923  | 159.619   |

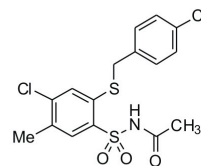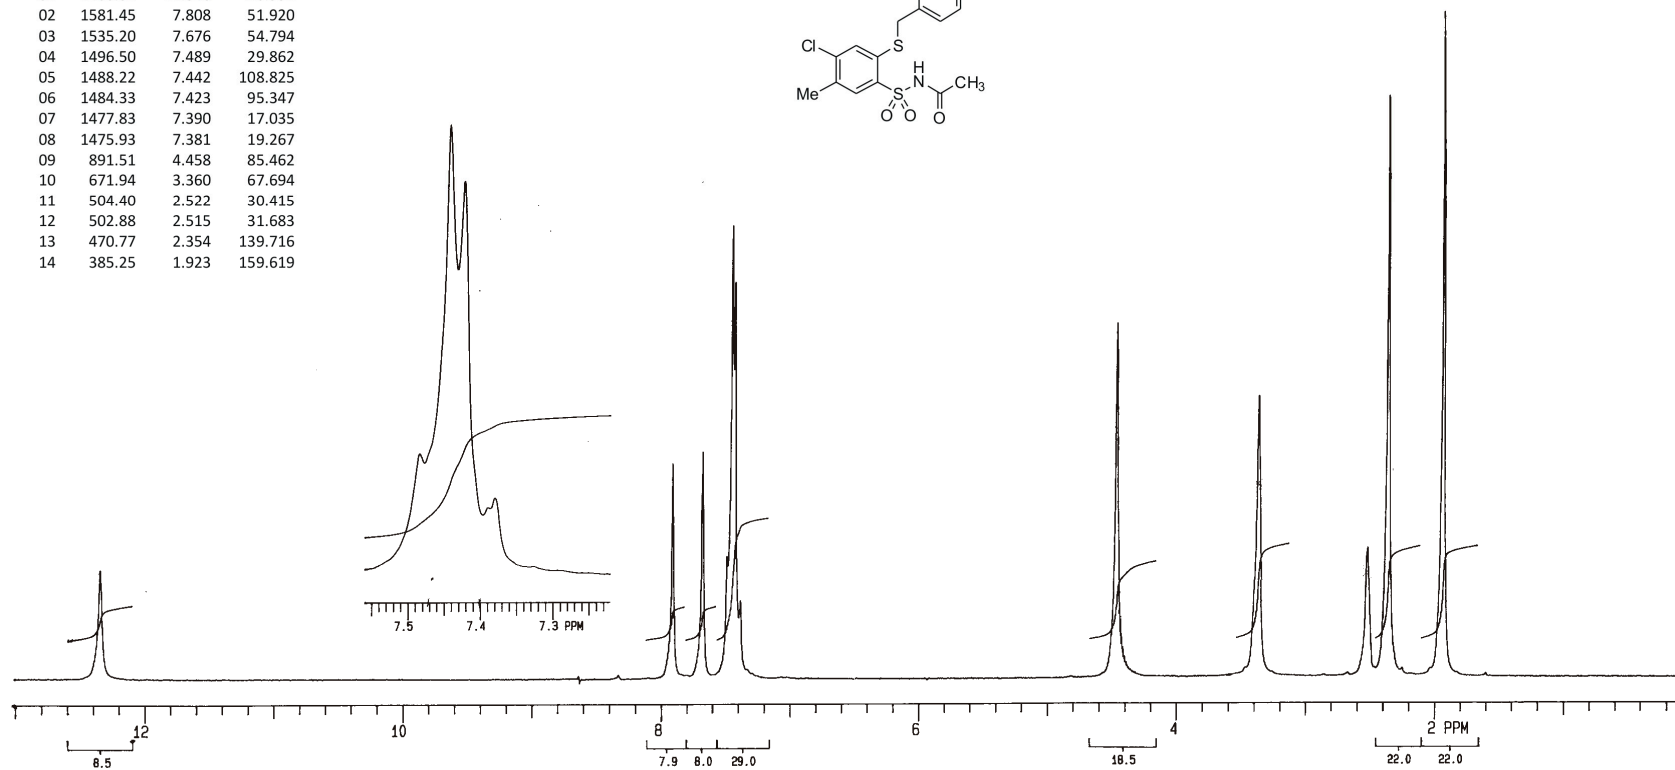

Figure S20.  $^1\text{H-NMR}$  of compound **24** (200 MHz,  $\text{DMSO-}d_6$ ).

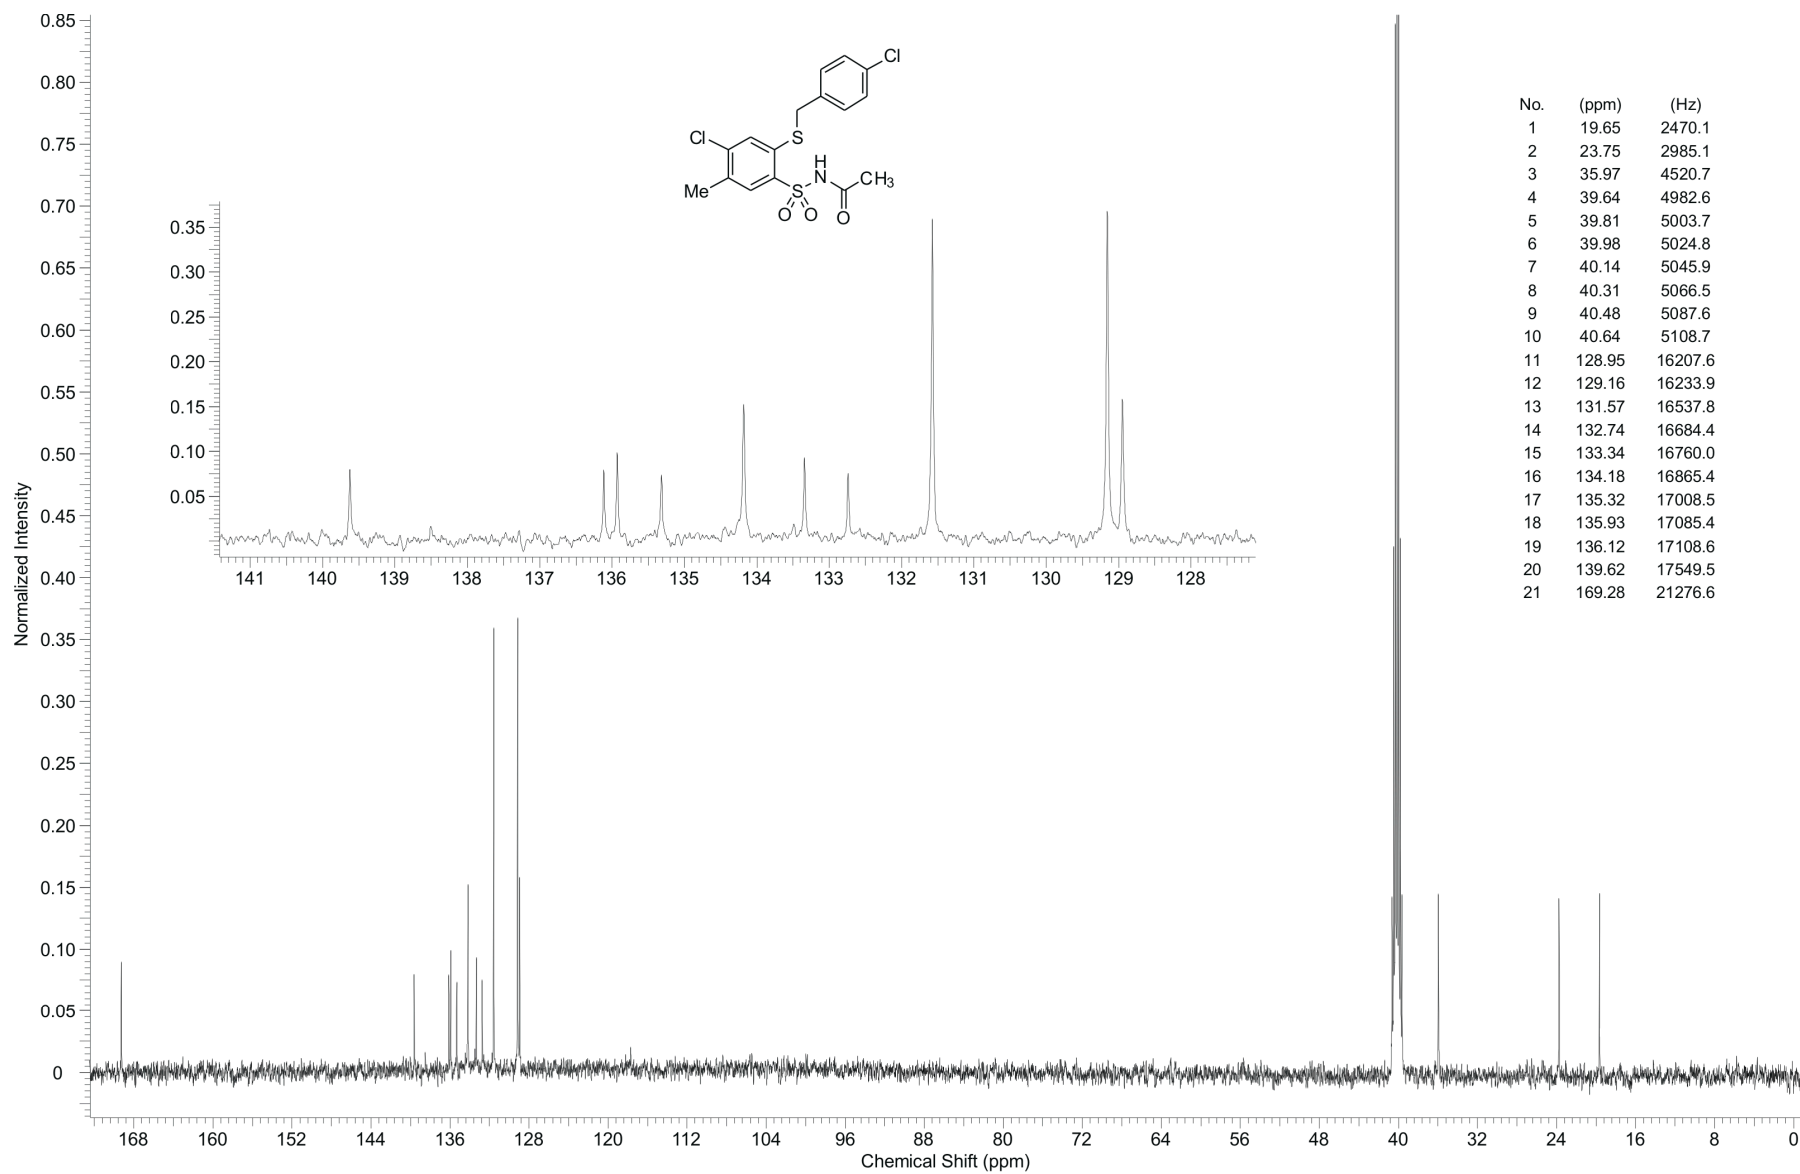

Figure S21.  $^{13}\text{C}$ -NMR of compound 24 (125 MHz,  $\text{DMSO-}d_6$ ).

SPECIAL LINES FOR TH= 4.04

RFL= 672.9 RFP= 499.9

| INDEX | FREQ    | PPM    | INTENSITY |
|-------|---------|--------|-----------|
| 01    | 2461.78 | 12.310 | 25.620    |
| 02    | 1582.84 | 7.915  | 36.722    |
| 03    | 1533.90 | 7.670  | 39.035    |
| 04    | 1490.59 | 7.454  | 21.193    |
| 05    | 1483.99 | 7.421  | 37.685    |
| 06    | 1473.37 | 7.368  | 16.889    |
| 07    | 1467.40 | 7.338  | 36.040    |
| 08    | 1459.92 | 7.301  | 38.603    |
| 09    | 1452.97 | 7.266  | 13.257    |
| 10    | 1447.92 | 7.240  | 5.441     |
| 11    | 888.55  | 4.443  | 61.971    |
| 12    | 672.36  | 3.362  | 38.196    |
| 13    | 503.34  | 2.517  | 36.909    |
| 14    | 471.52  | 2.358  | 100.658   |
| 15    | 457.84  | 2.289  | 12.276    |
| 16    | 450.42  | 2.252  | 30.265    |
| 17    | 443.00  | 2.215  | 30.772    |
| 18    | 435.57  | 2.178  | 11.754    |
| 19    | 400.79  | 2.004  | 6.583     |
| 20    | 249.63  | 1.248  | 4.221     |
| 21    | 237.52  | 1.188  | 4.107     |
| 22    | 185.57  | 0.928  | 32.100    |
| 23    | 178.21  | 0.891  | 60.336    |
| 24    | 170.78  | 0.854  | 28.544    |

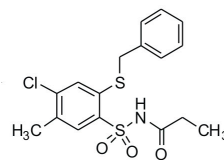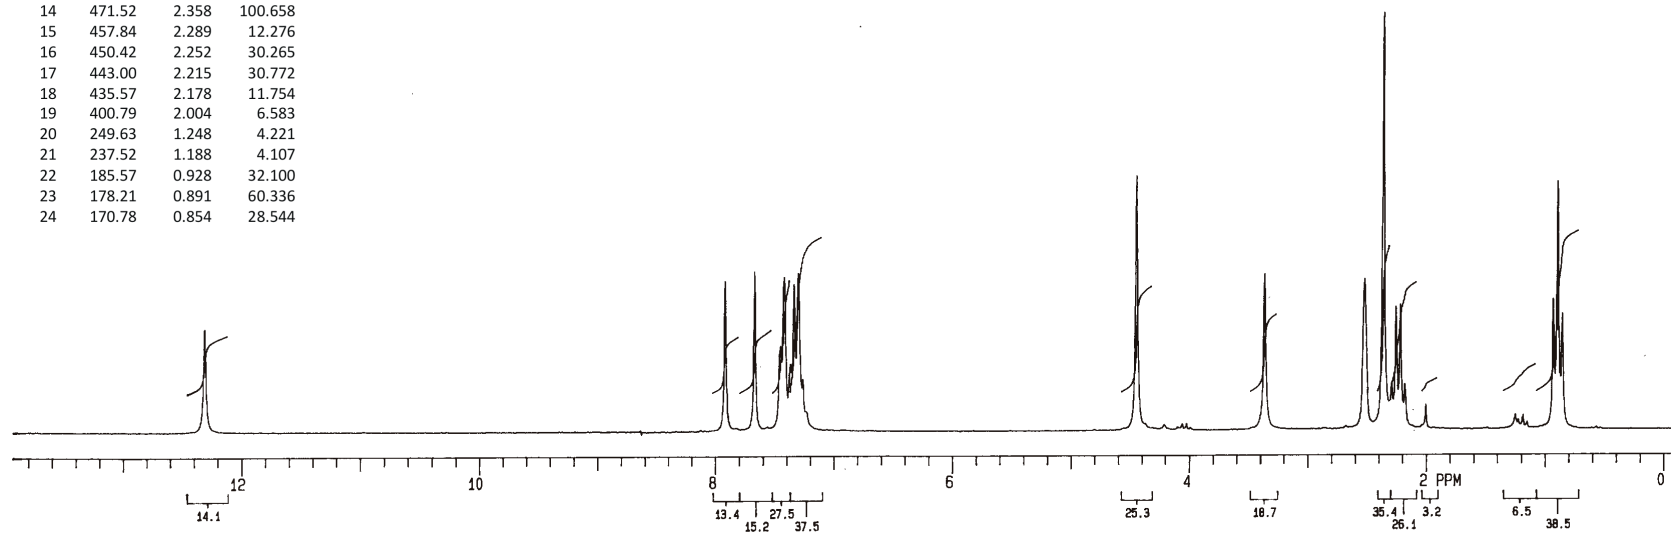

Figure S22.  $^1\text{H-NMR}$  of compound **33** (200 MHz,  $\text{DMSO-}d_6$ ).

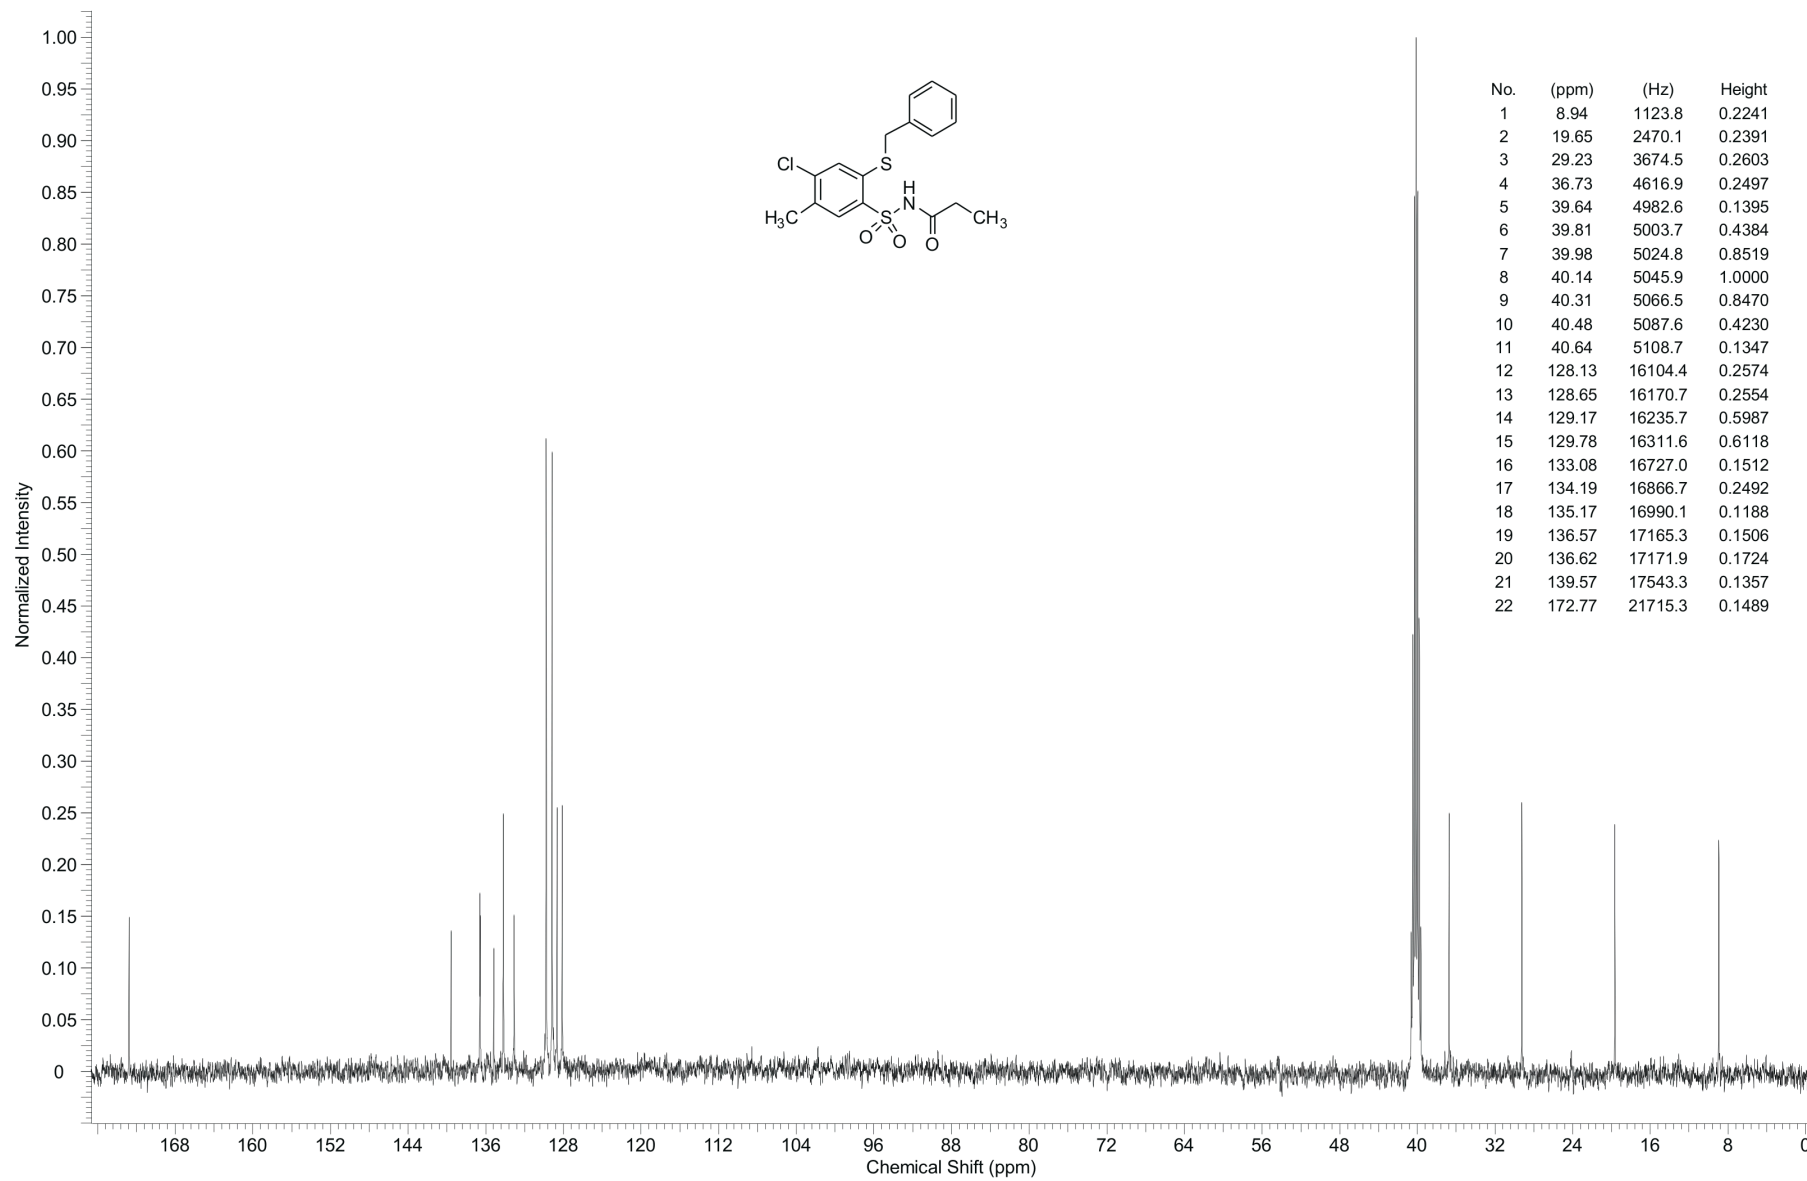

Figure S23.  $^{13}\text{C}$ -NMR of compound 33 (125 MHz,  $\text{DMSO-}d_6$ ).

SPECIAL LINES FOR TH= 4.04  
RFL= 672.9 RFP= 499.9

| INDEX | FREQ    | PPM    | INTENSITY |
|-------|---------|--------|-----------|
| 01    | 2453.94 | 12.271 | 37.393    |
| 02    | 1581.16 | 7.907  | 43.672    |
| 03    | 1531.30 | 7.657  | 44.954    |
| 04    | 1473.79 | 7.359  | 50.301    |
| 05    | 1464.74 | 7.325  | 57.055    |
| 06    | 1380.89 | 6.905  | 51.189    |
| 07    | 1373.65 | 6.869  | 46.027    |
| 08    | 873.71  | 4.369  | 76.249    |
| 09    | 746.28  | 3.732  | 139.120   |
| 10    | 670.68  | 3.351  | 88.837    |
| 11    | 501.49  | 2.508  | 77.017    |
| 12    | 471.11  | 2.356  | 124.565   |
| 13    | 455.47  | 2.278  | 23.265    |
| 14    | 448.51  | 2.243  | 41.904    |
| 15    | 441.32  | 2.207  | 42.421    |
| 16    | 434.47  | 2.173  | 21.431    |
| 17    | 183.31  | 0.917  | 44.163    |
| 18    | 176.94  | 0.885  | 73.982    |
| 19    | 169.99  | 0.850  | 42.362    |

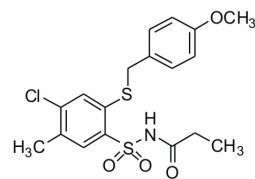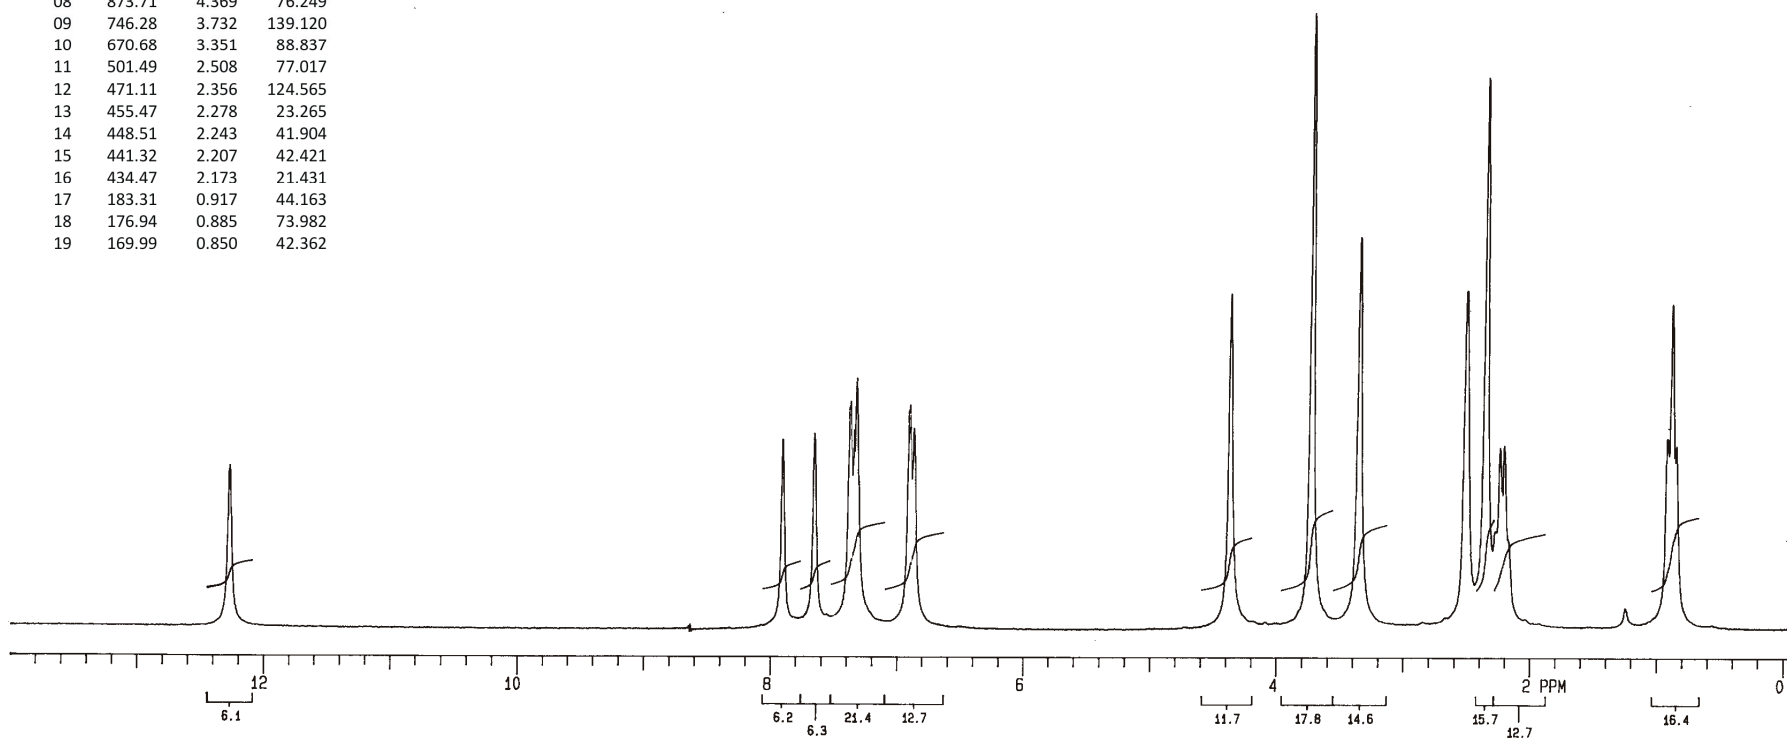

Figure S24.  $^1\text{H-NMR}$  of compound **37** (200 MHz,  $\text{DMSO-}d_6$ ).



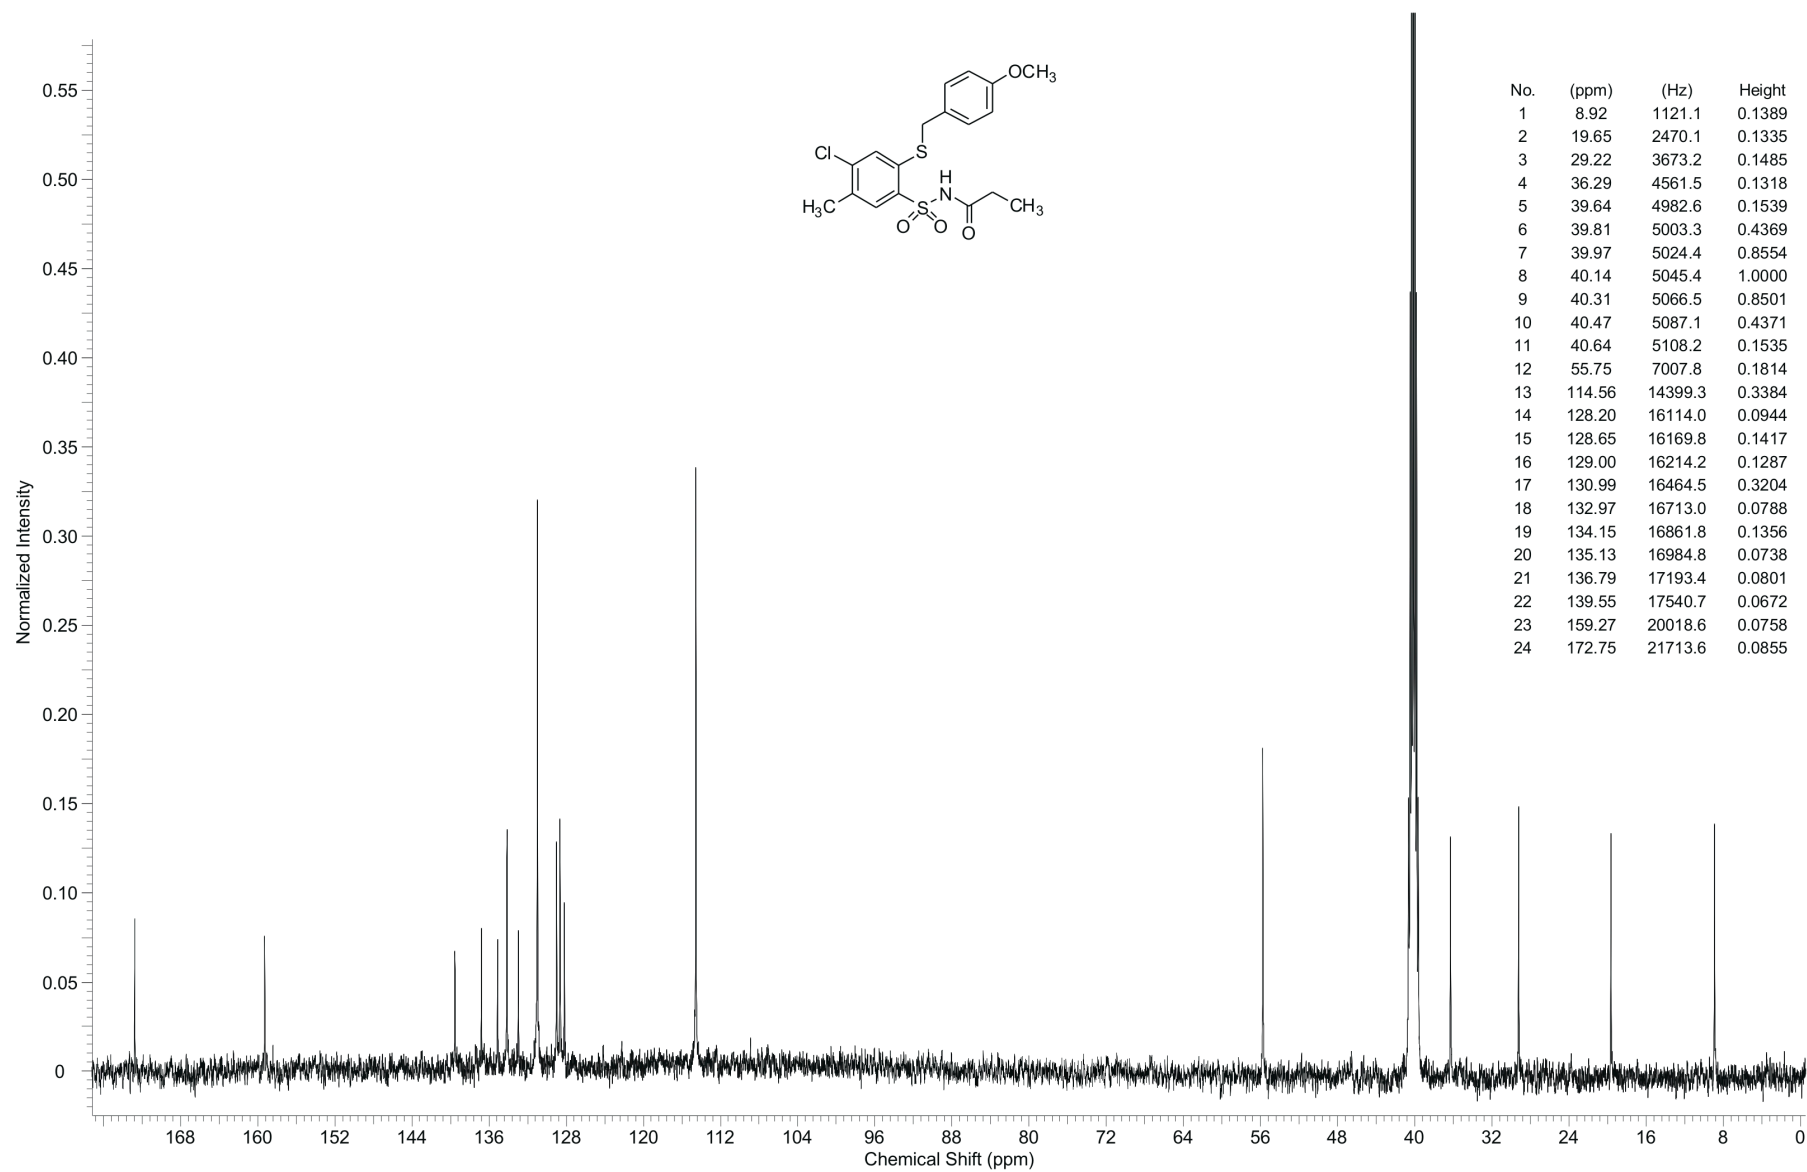

Figure S25.  $^{13}\text{C}$ -NMR of compound 37 (125 MHz,  $\text{DMSO}-d_6$ ).

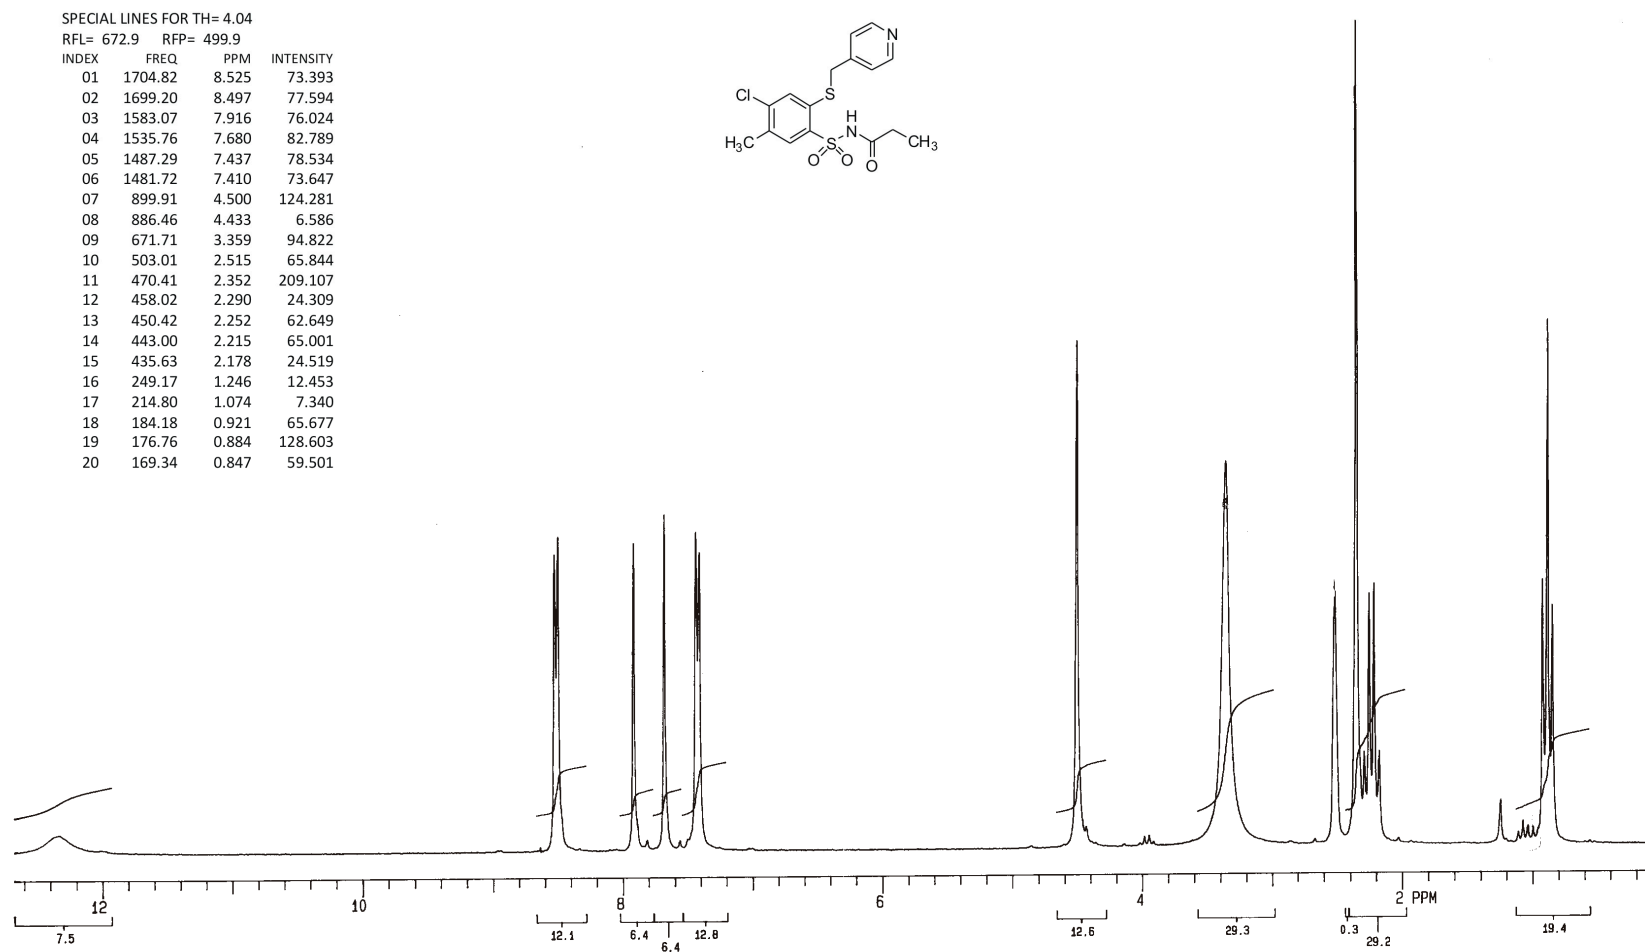

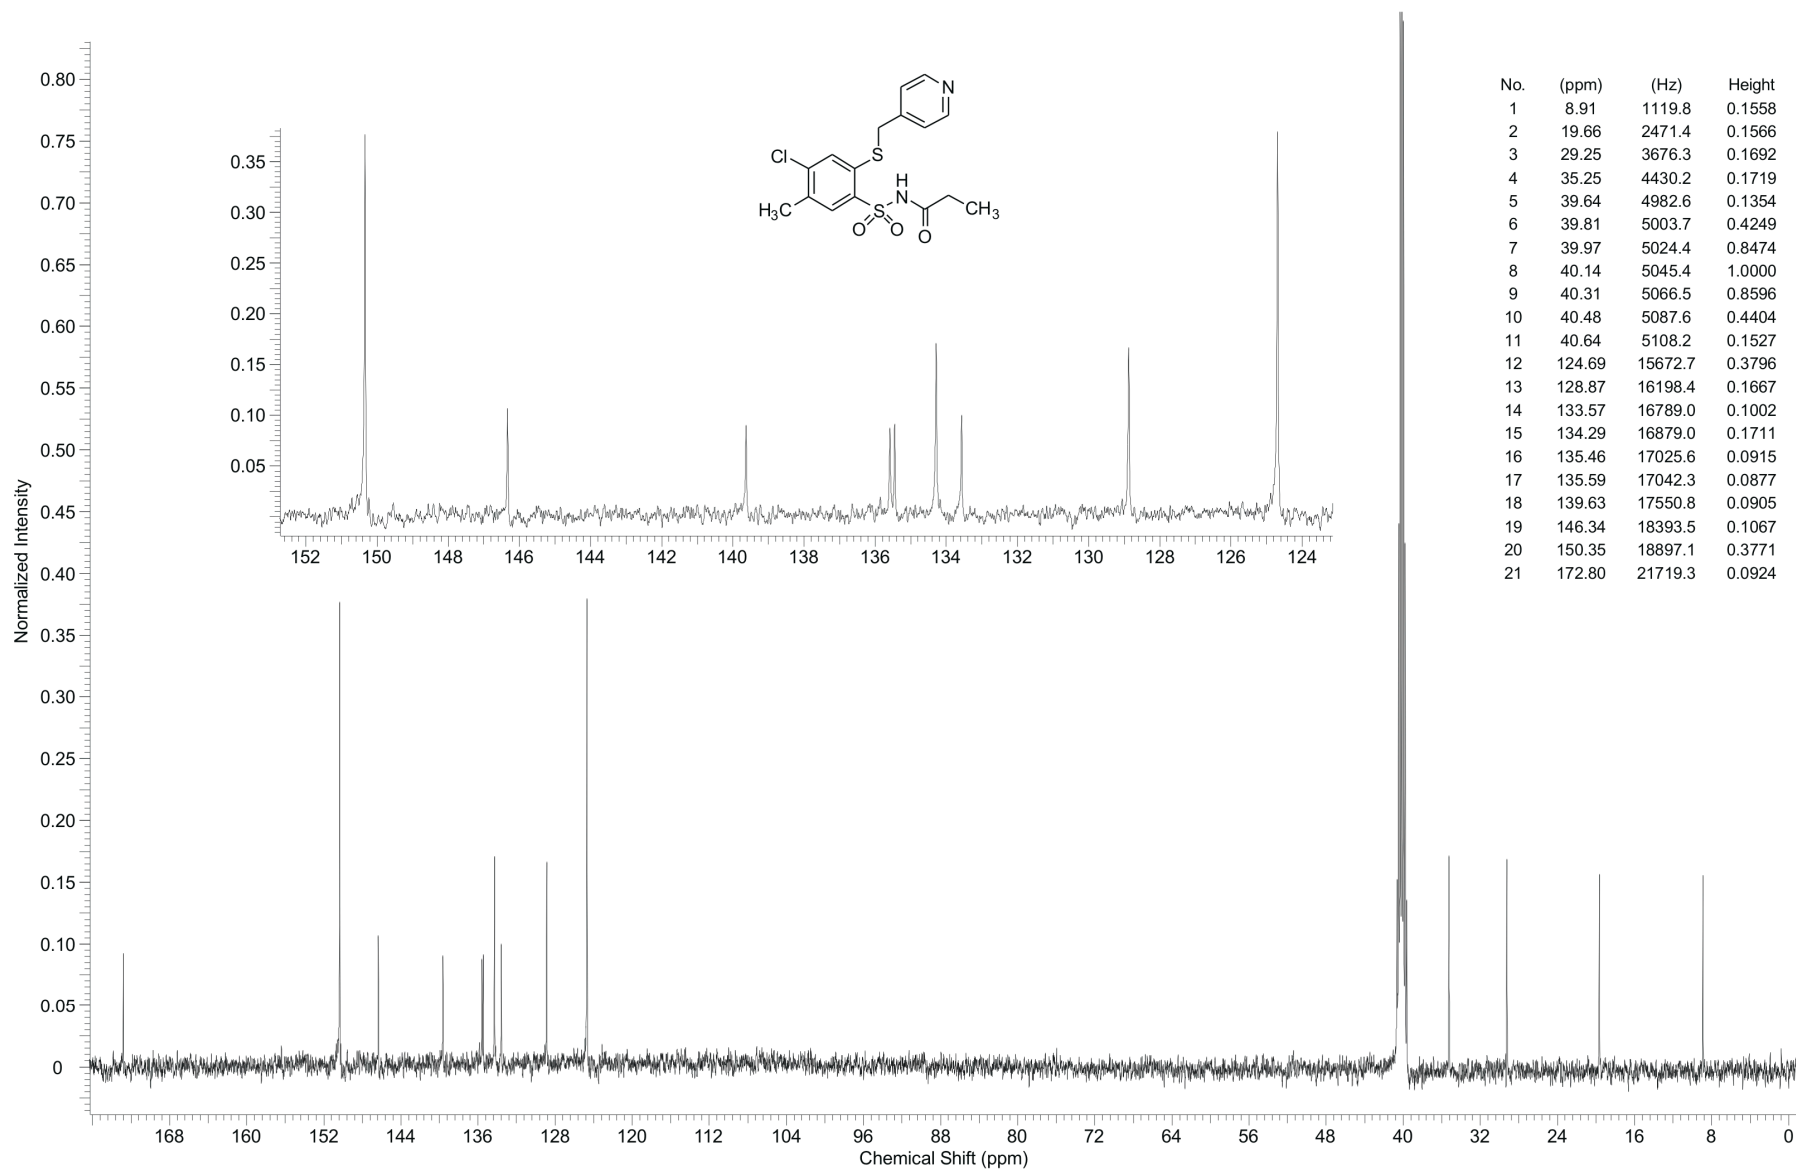

**Figure S27.**  $^{13}\text{C}$ -NMR of compound **38** (125 MHz,  $\text{DMSO-}d_6$ ).

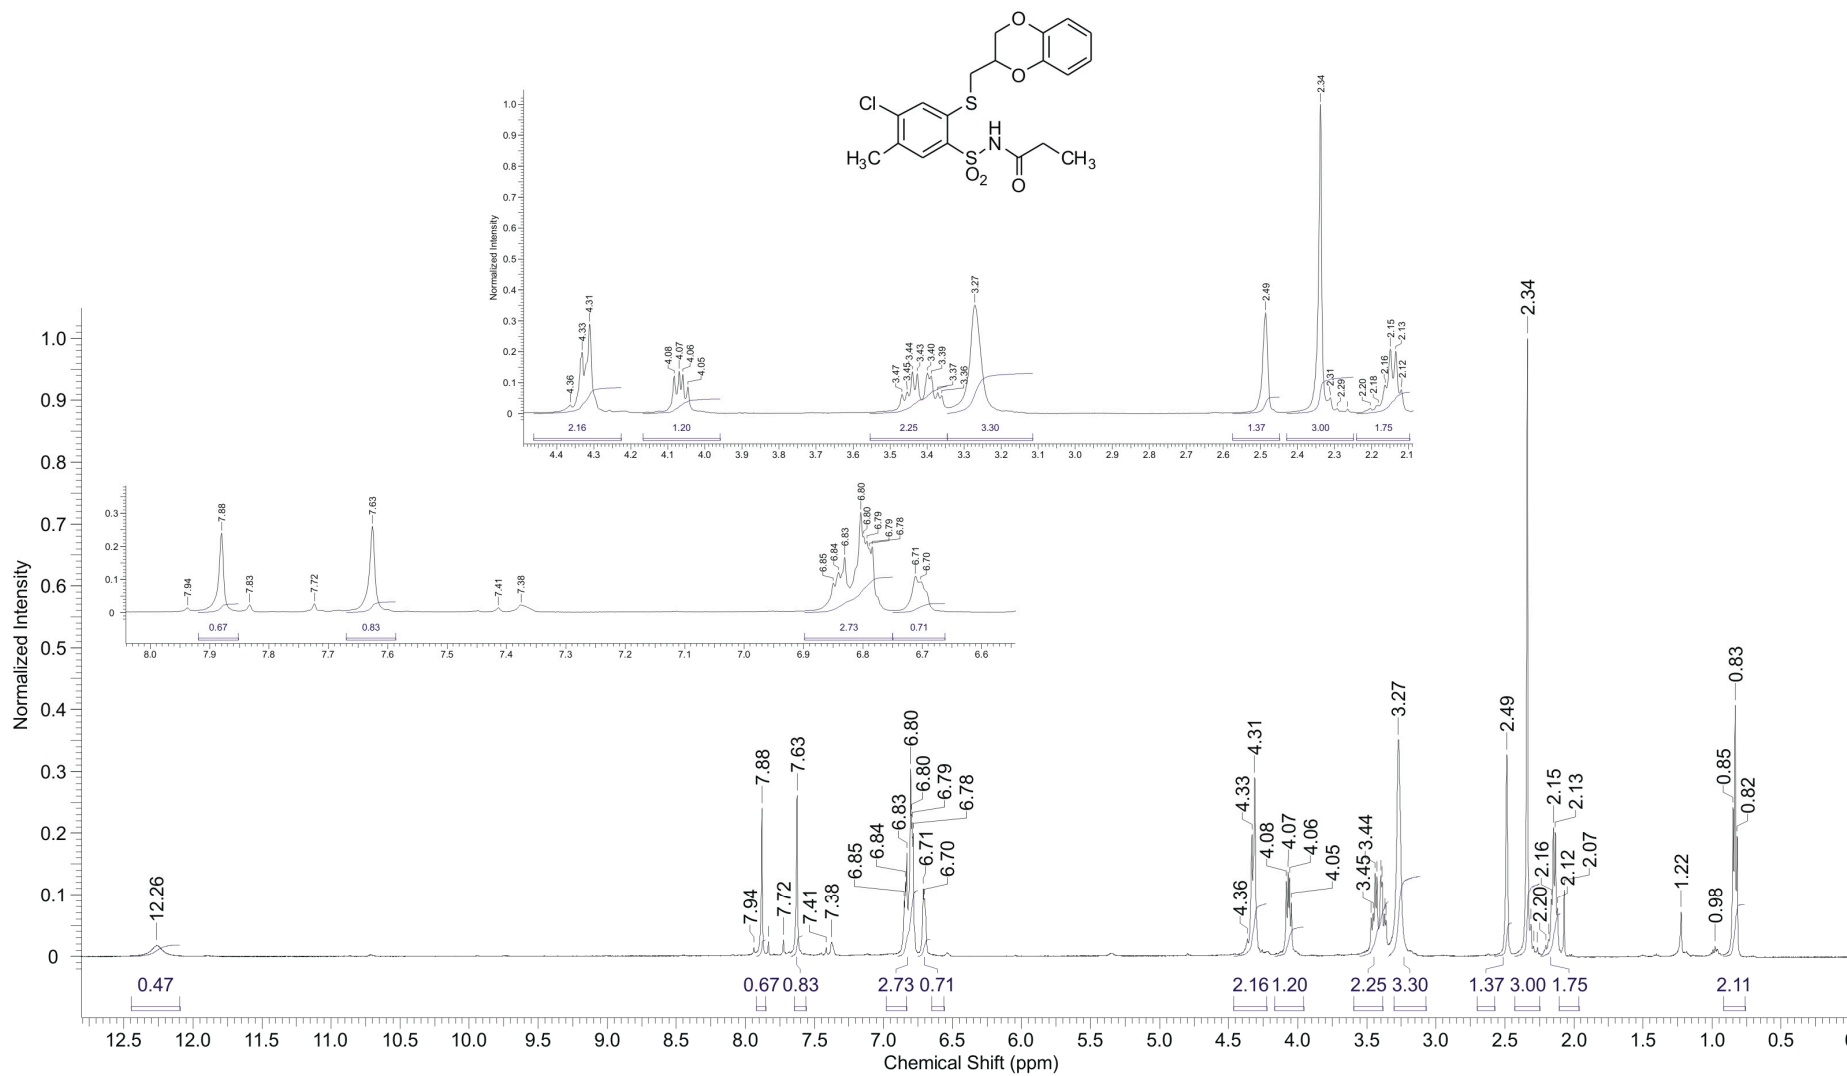

**Figure S28.** <sup>1</sup>H-NMR of compound **40** (500 MHz, DMSO-*d*<sub>6</sub>).

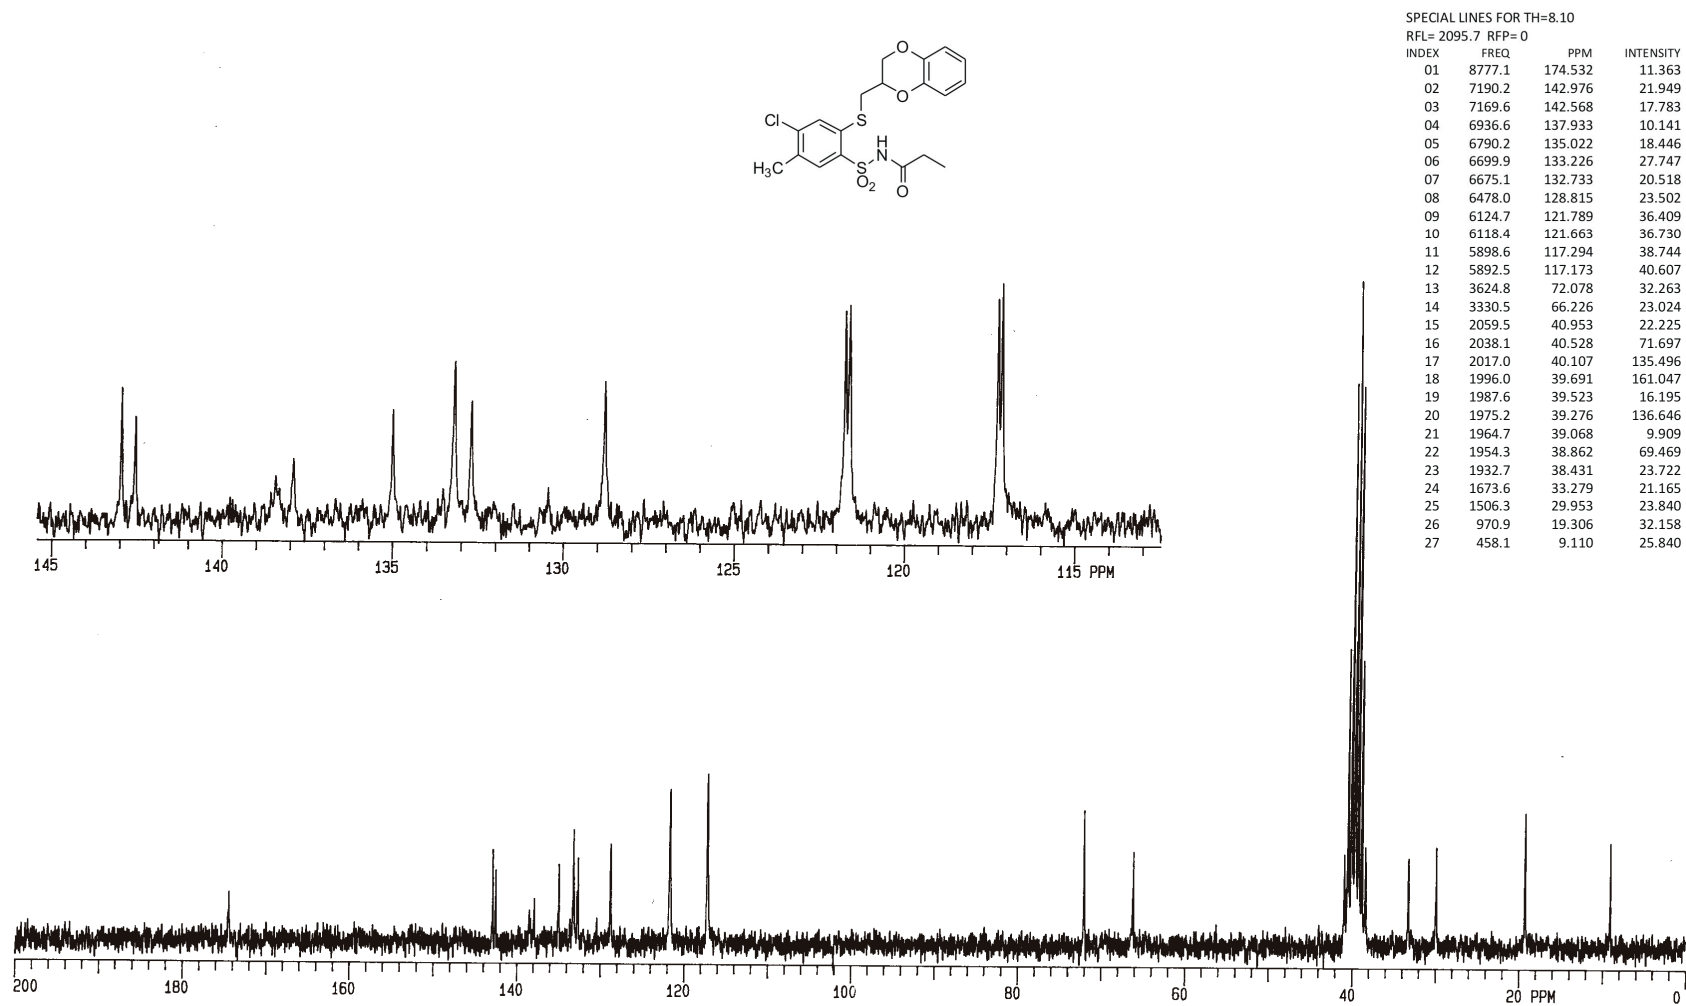

Figure S29.  $^{13}\text{C}$ -NMR of compound **40** (50 MHz,  $\text{DMSO-}d_6$ ).

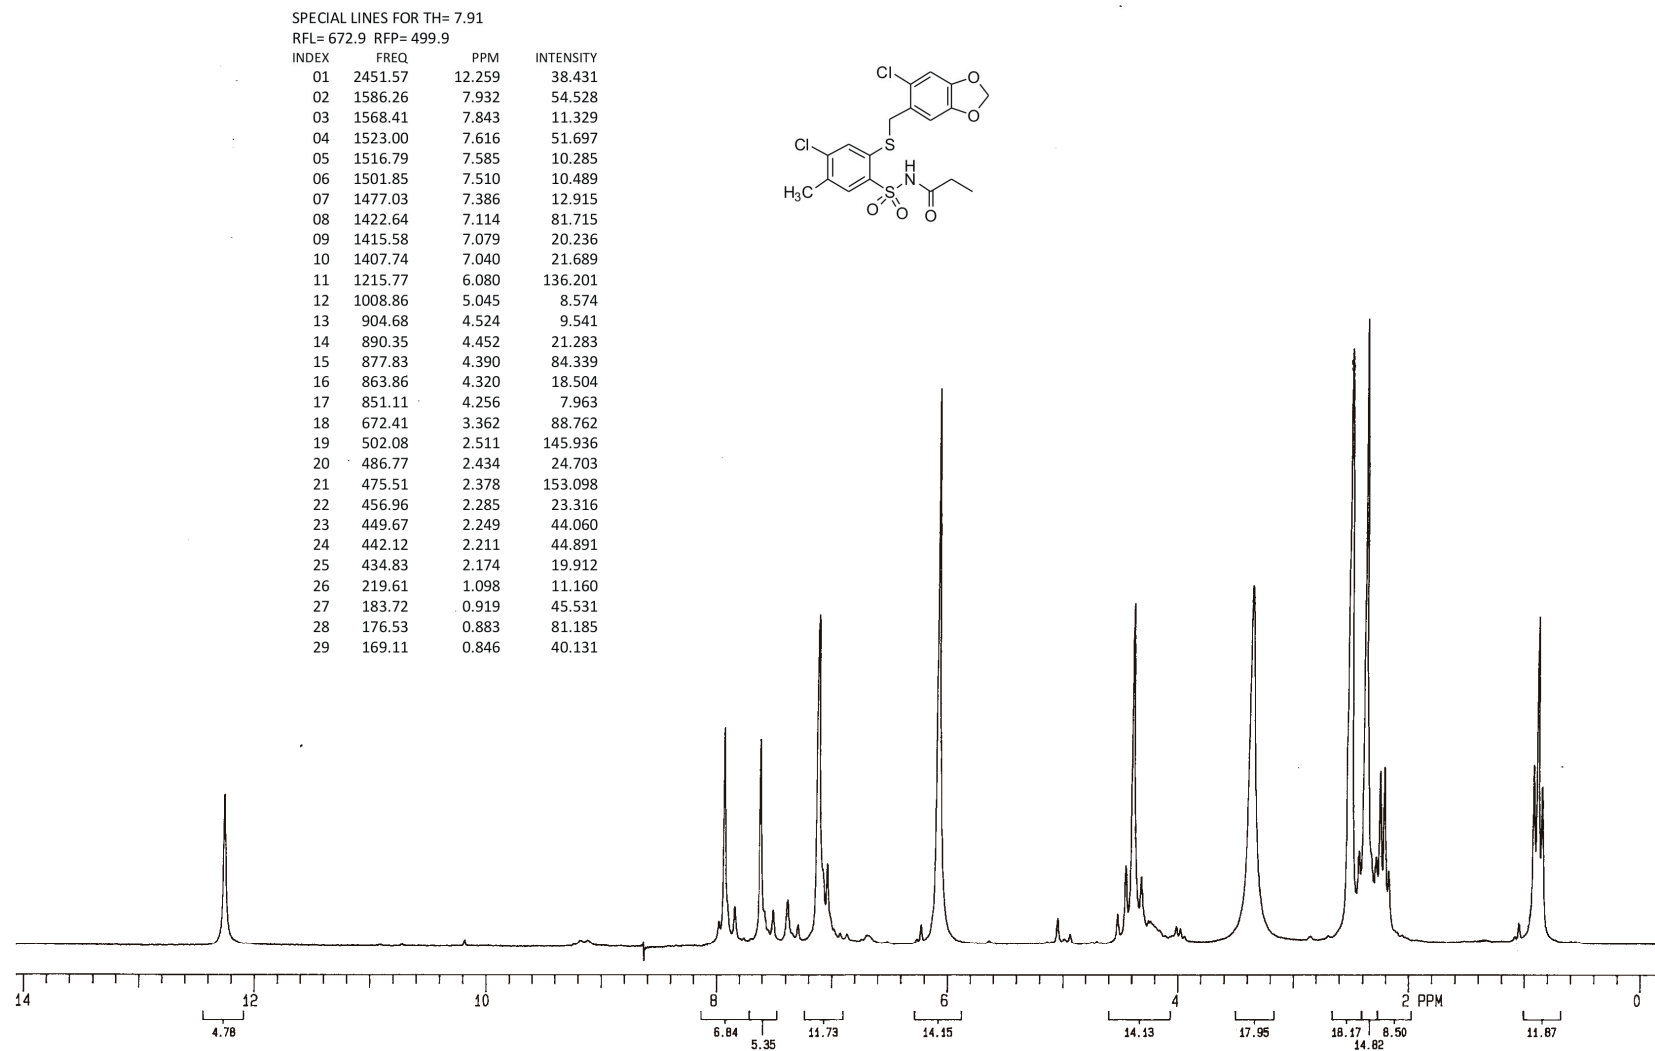

Figure S30.  $^1\text{H-NMR}$  of compound **41** (200 MHz,  $\text{DMSO-}d_6$ ).

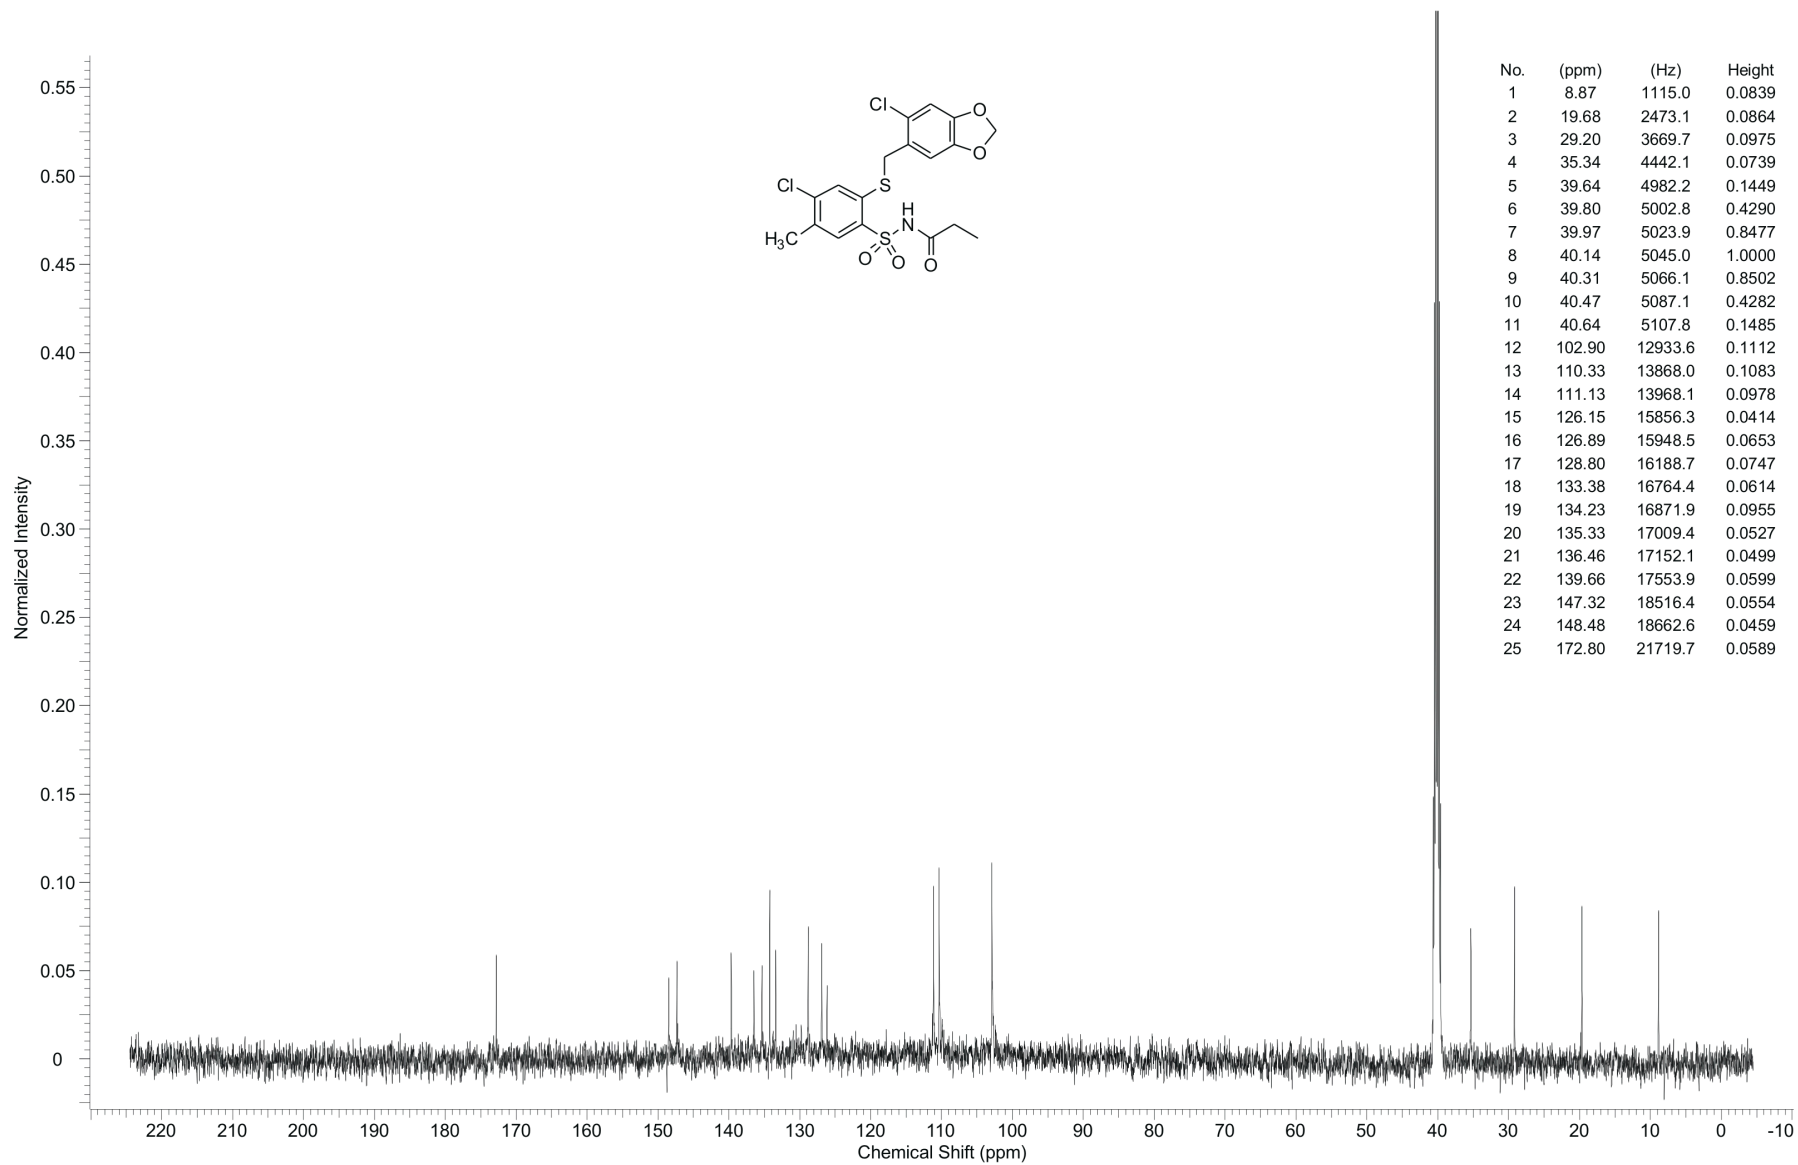

**Figure S31.** <sup>13</sup>C-NMR of compound **41** (125 MHz, DMSO-*d*<sub>6</sub>).

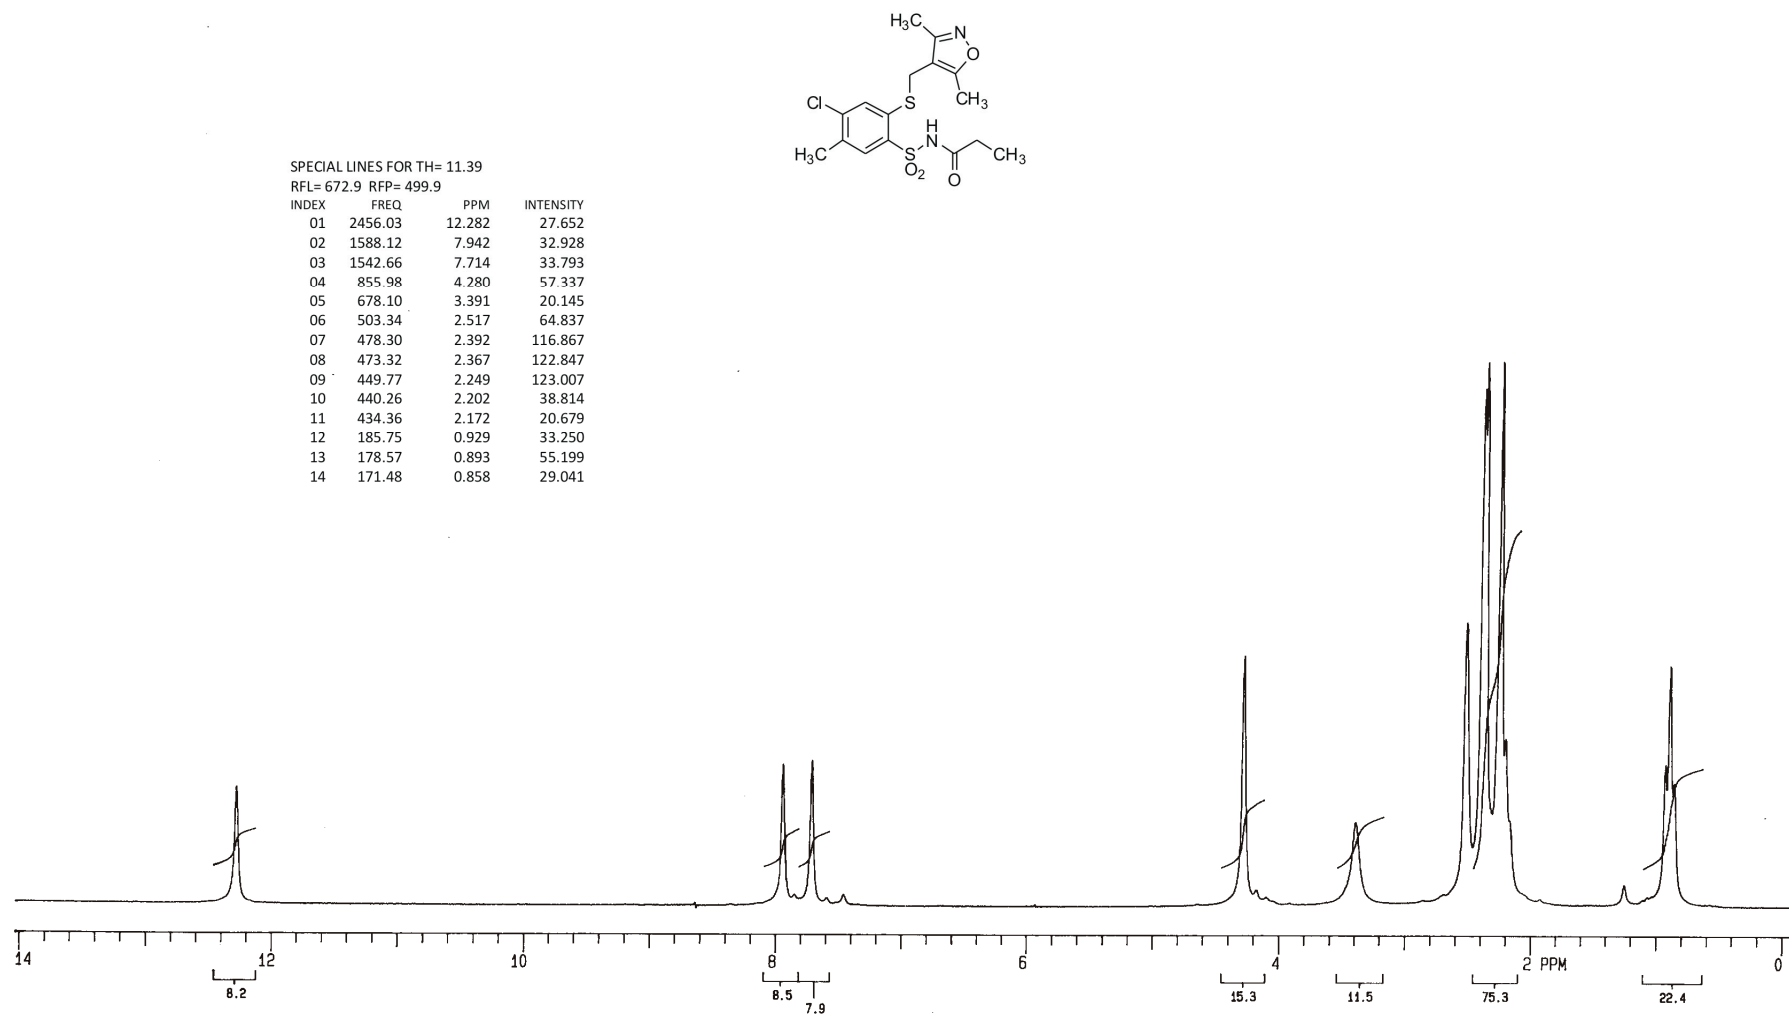

Figure S32.  $^1\text{H-NMR}$  of compound **42** (200 MHz,  $\text{DMSO-}d_6$ ).



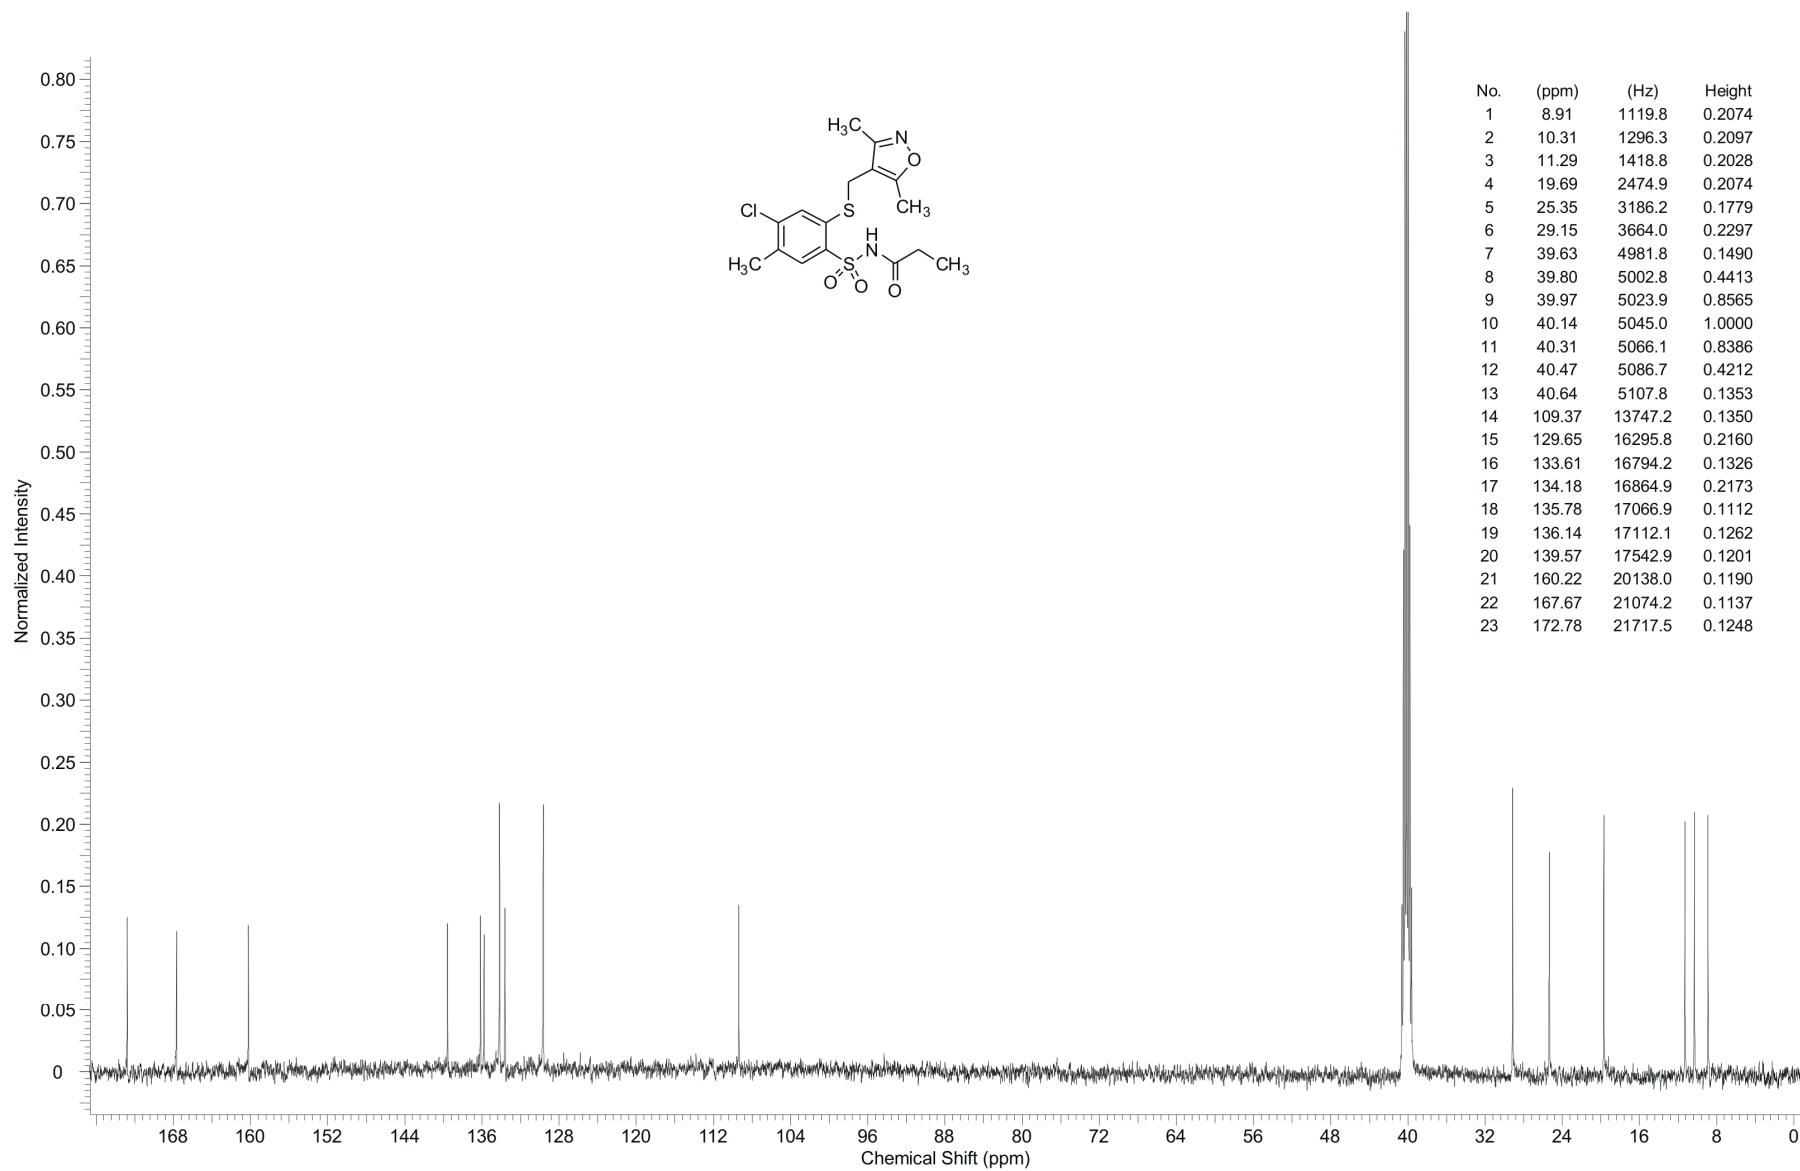

Figure S33.  $^{13}\text{C}$ -NMR of compound 42 (125 MHz,  $\text{DMSO-}d_6$ ).

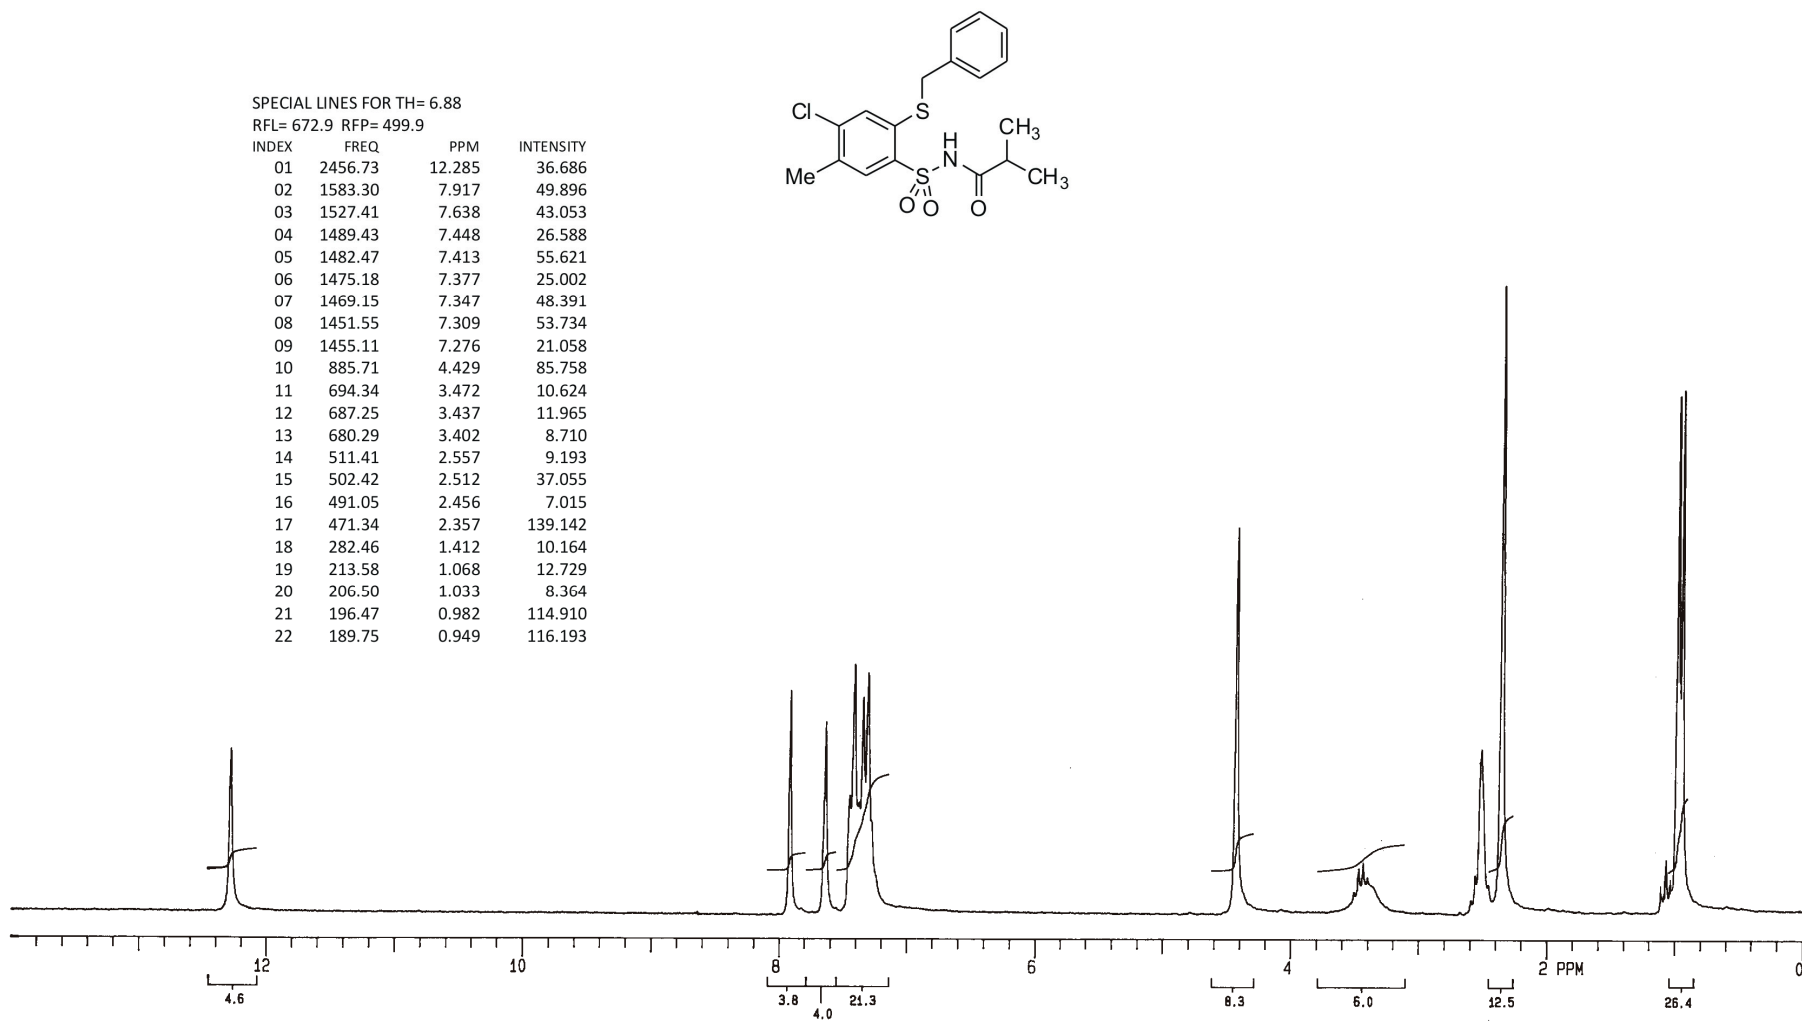

Figure S34.  $^1\text{H-NMR}$  of compound **43** (200 MHz,  $\text{DMSO-}d_6$ ).

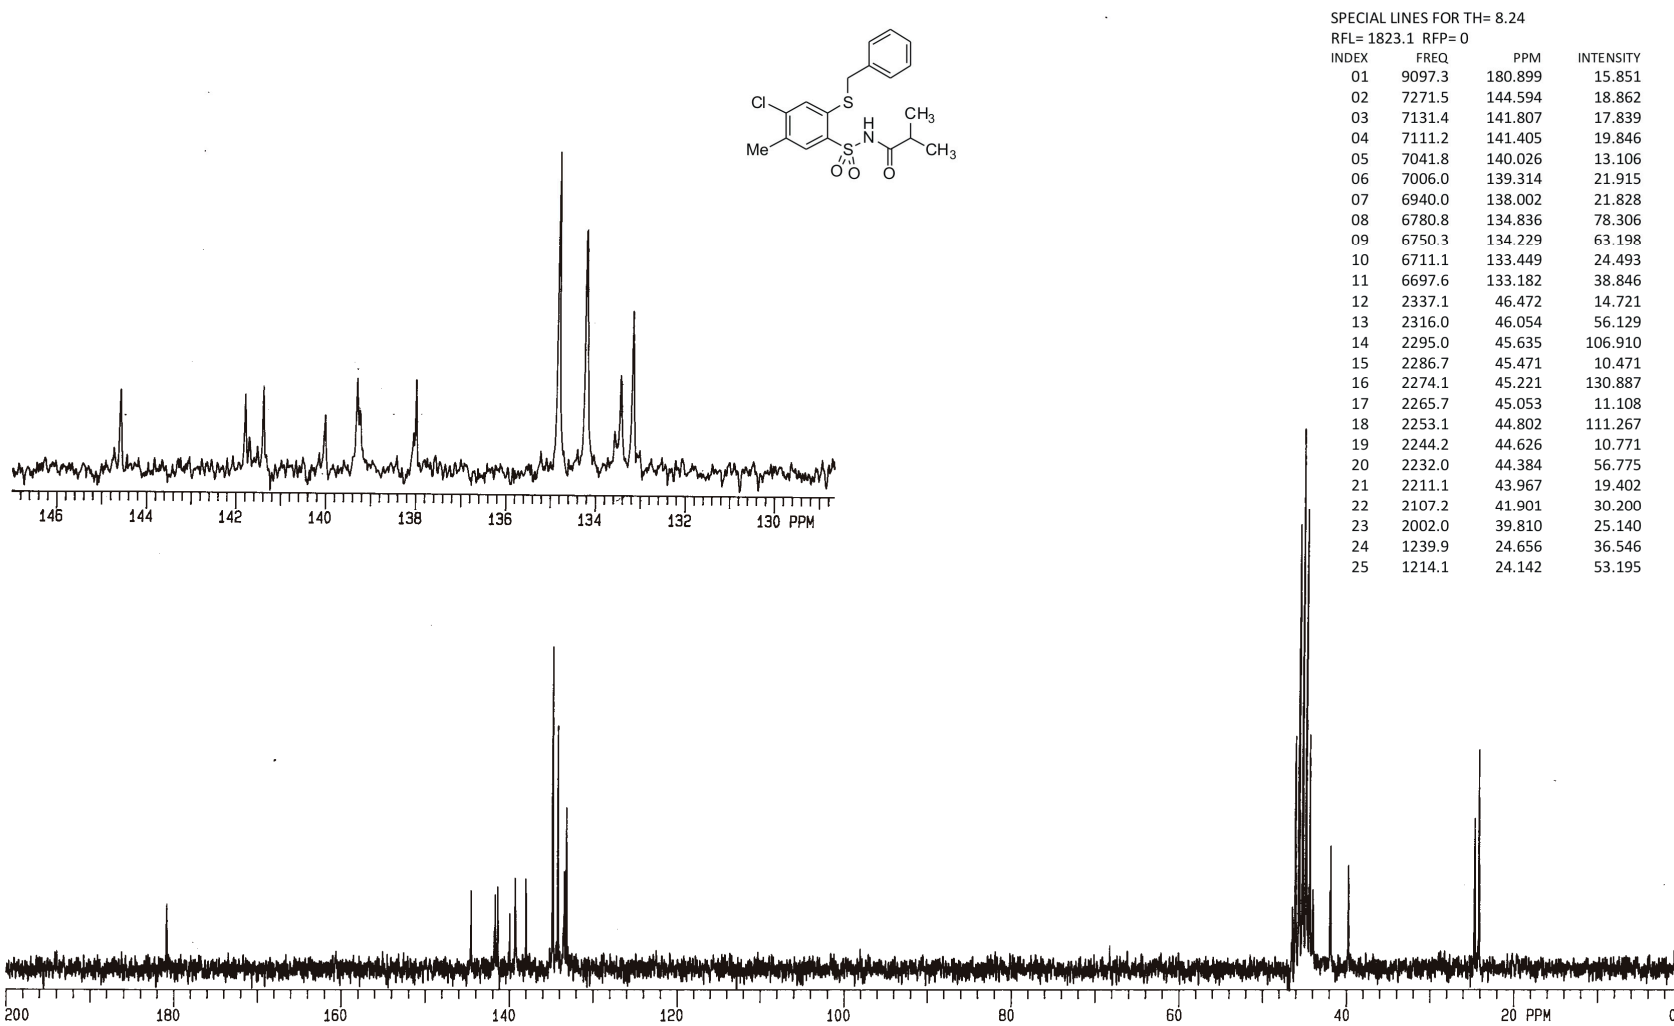

Figure S35.  $^{13}\text{C}$ -NMR of compound **43** (50 MHz,  $\text{DMSO-}d_6$ ).

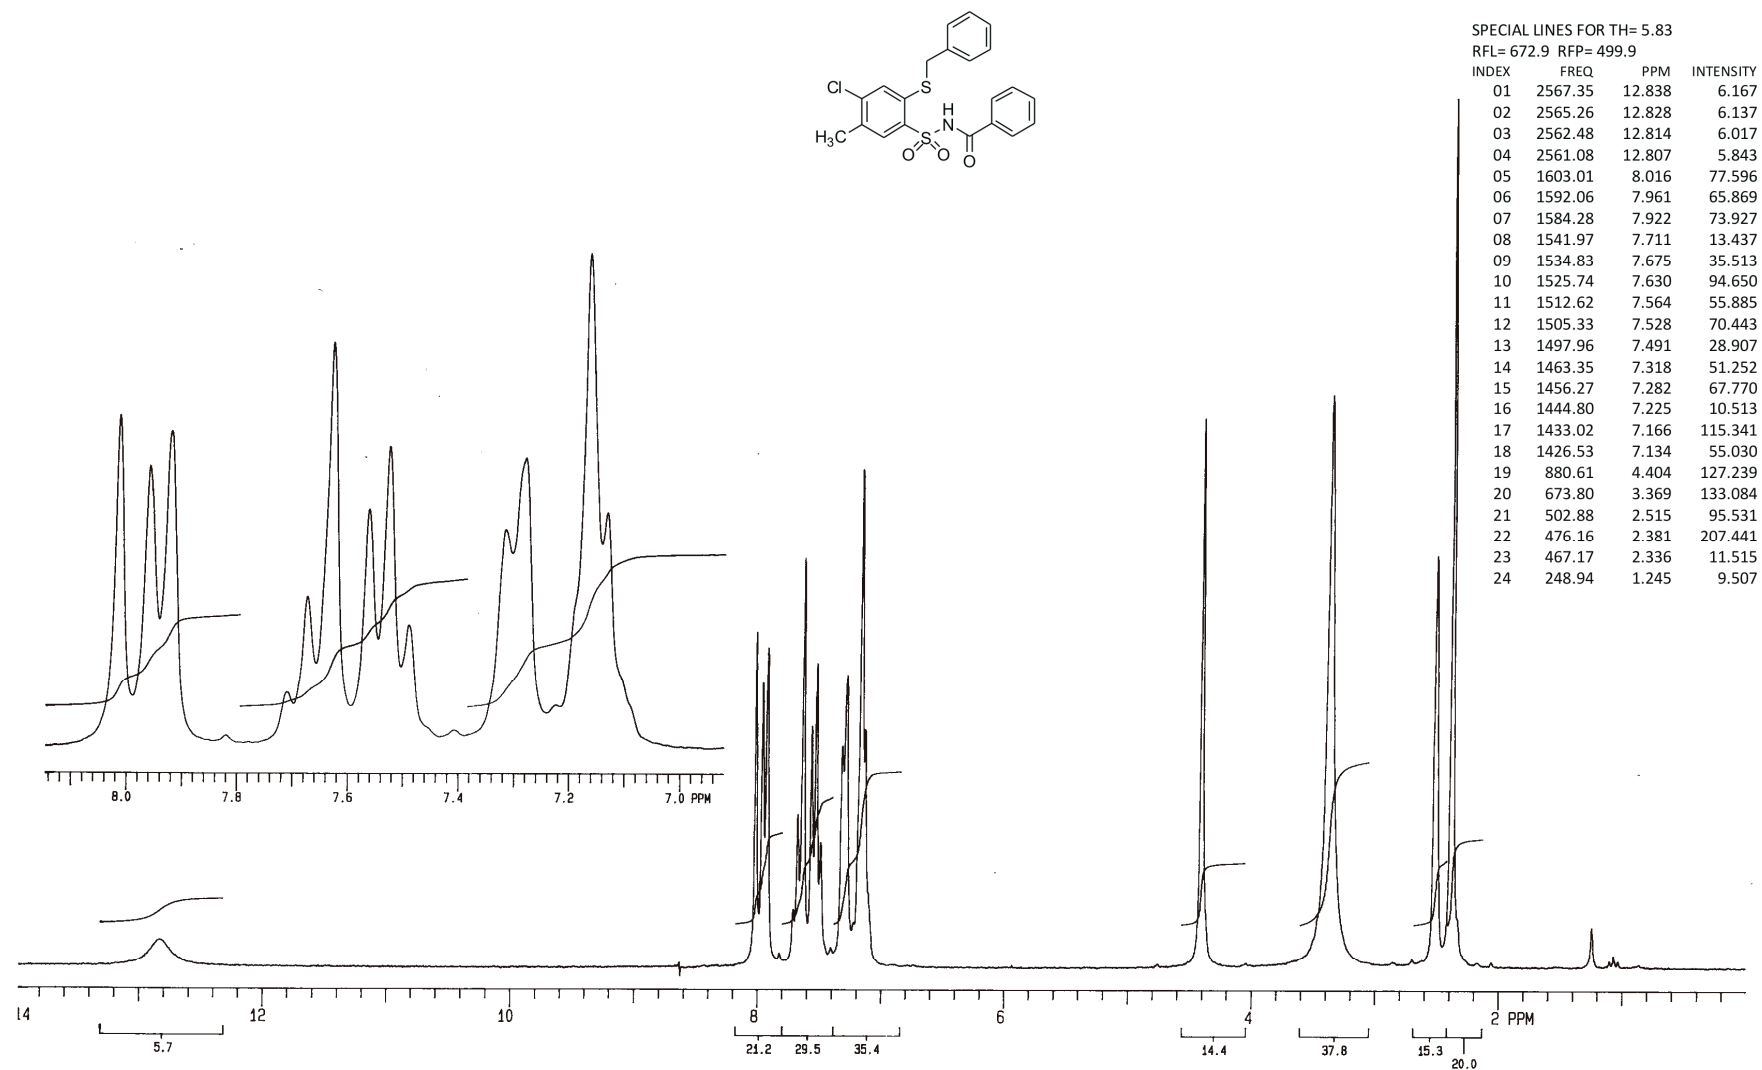

Figure S36. <sup>1</sup>H-NMR of compound 45 (200 MHz, DMSO-*d*<sub>6</sub>).

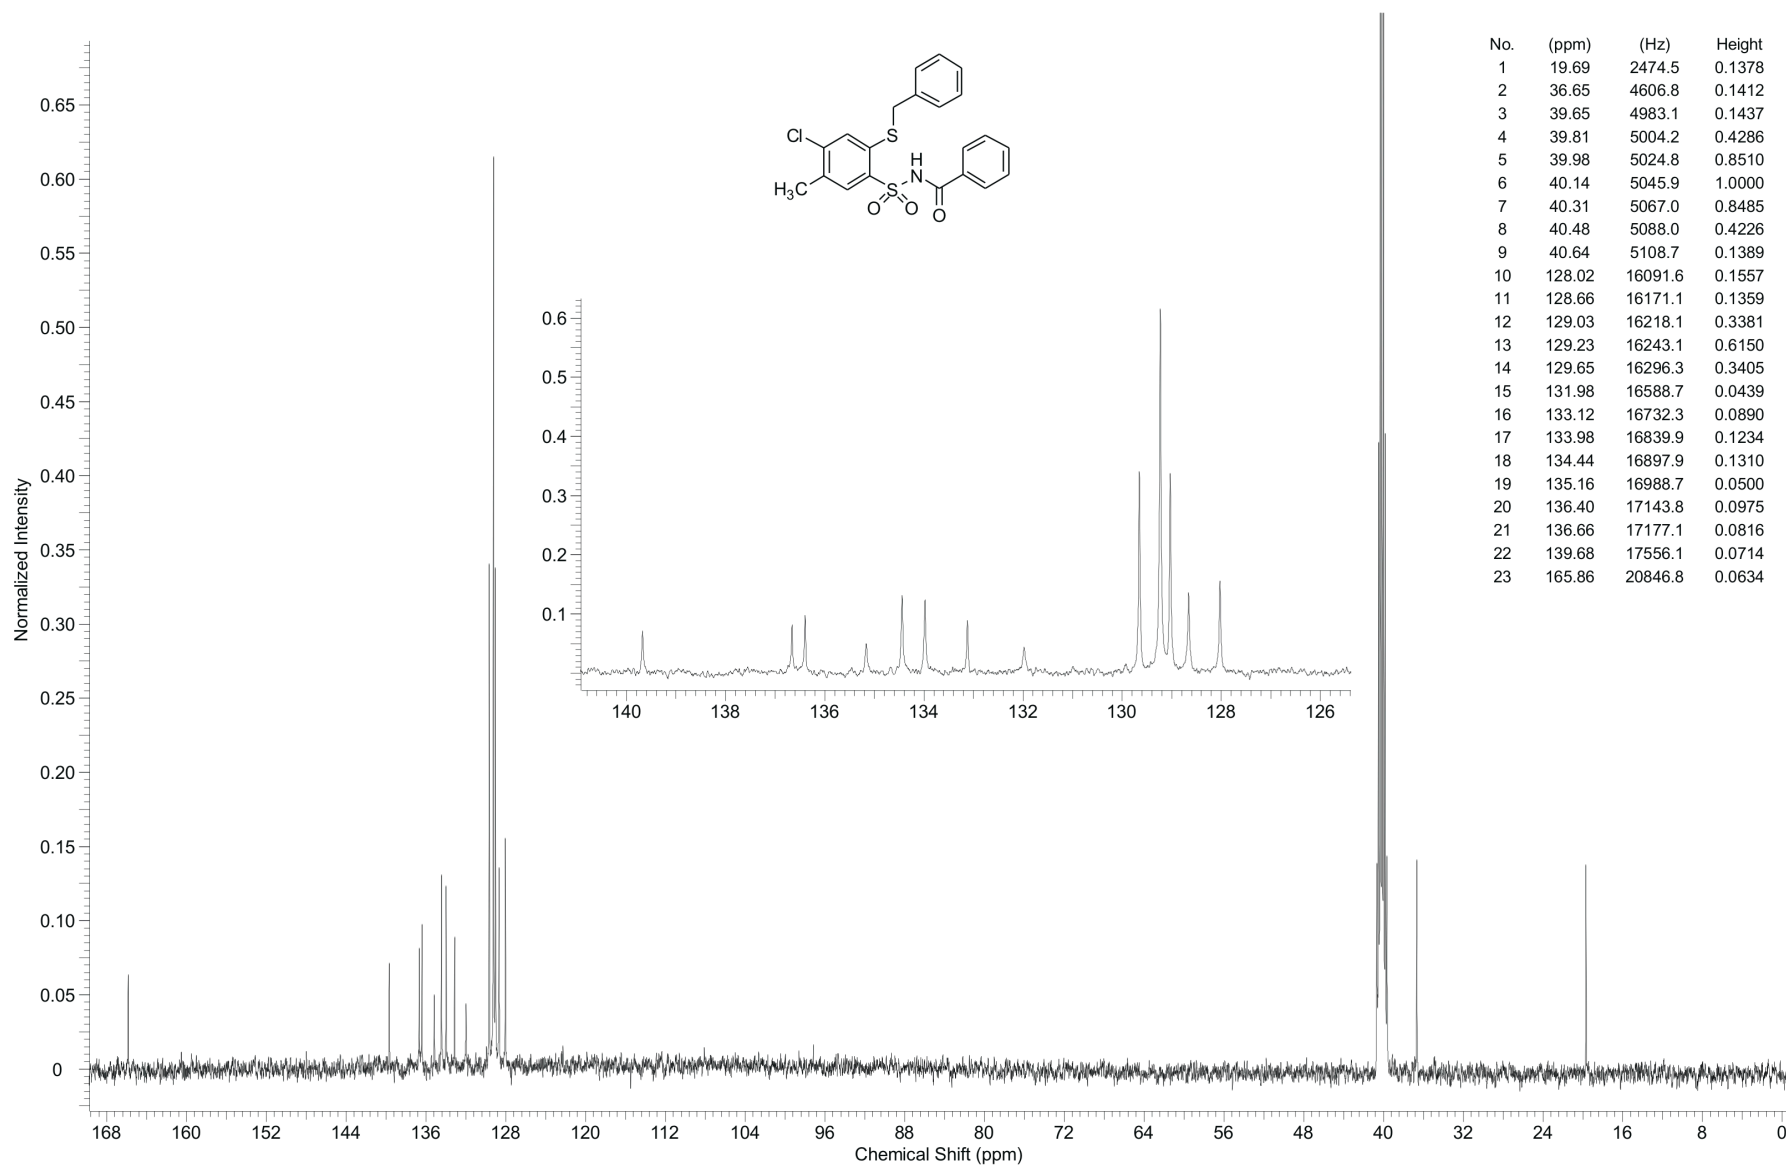

Figure S37.  $^{13}\text{C}$ -NMR of compound 45 (125 MHz,  $\text{DMSO-}d_6$ ).

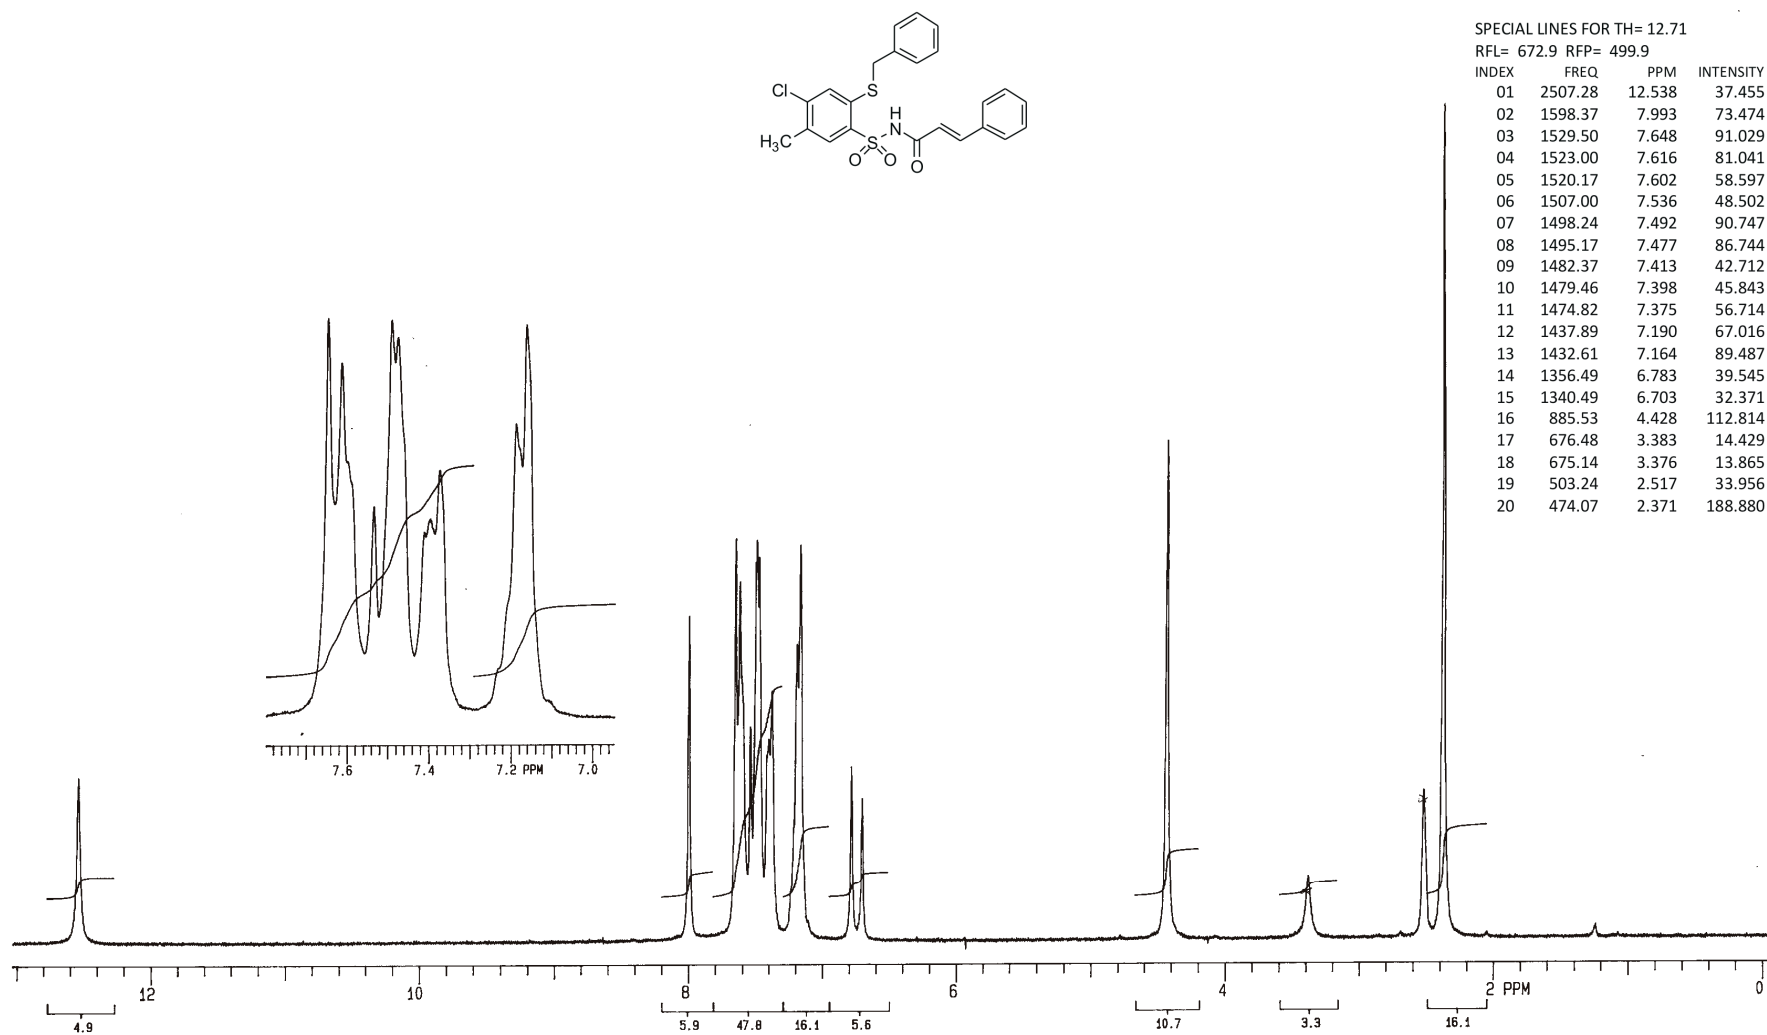

Figure S38.  $^1\text{H-NMR}$  of compound **46** (200 MHz,  $\text{DMSO-}d_6$ ).

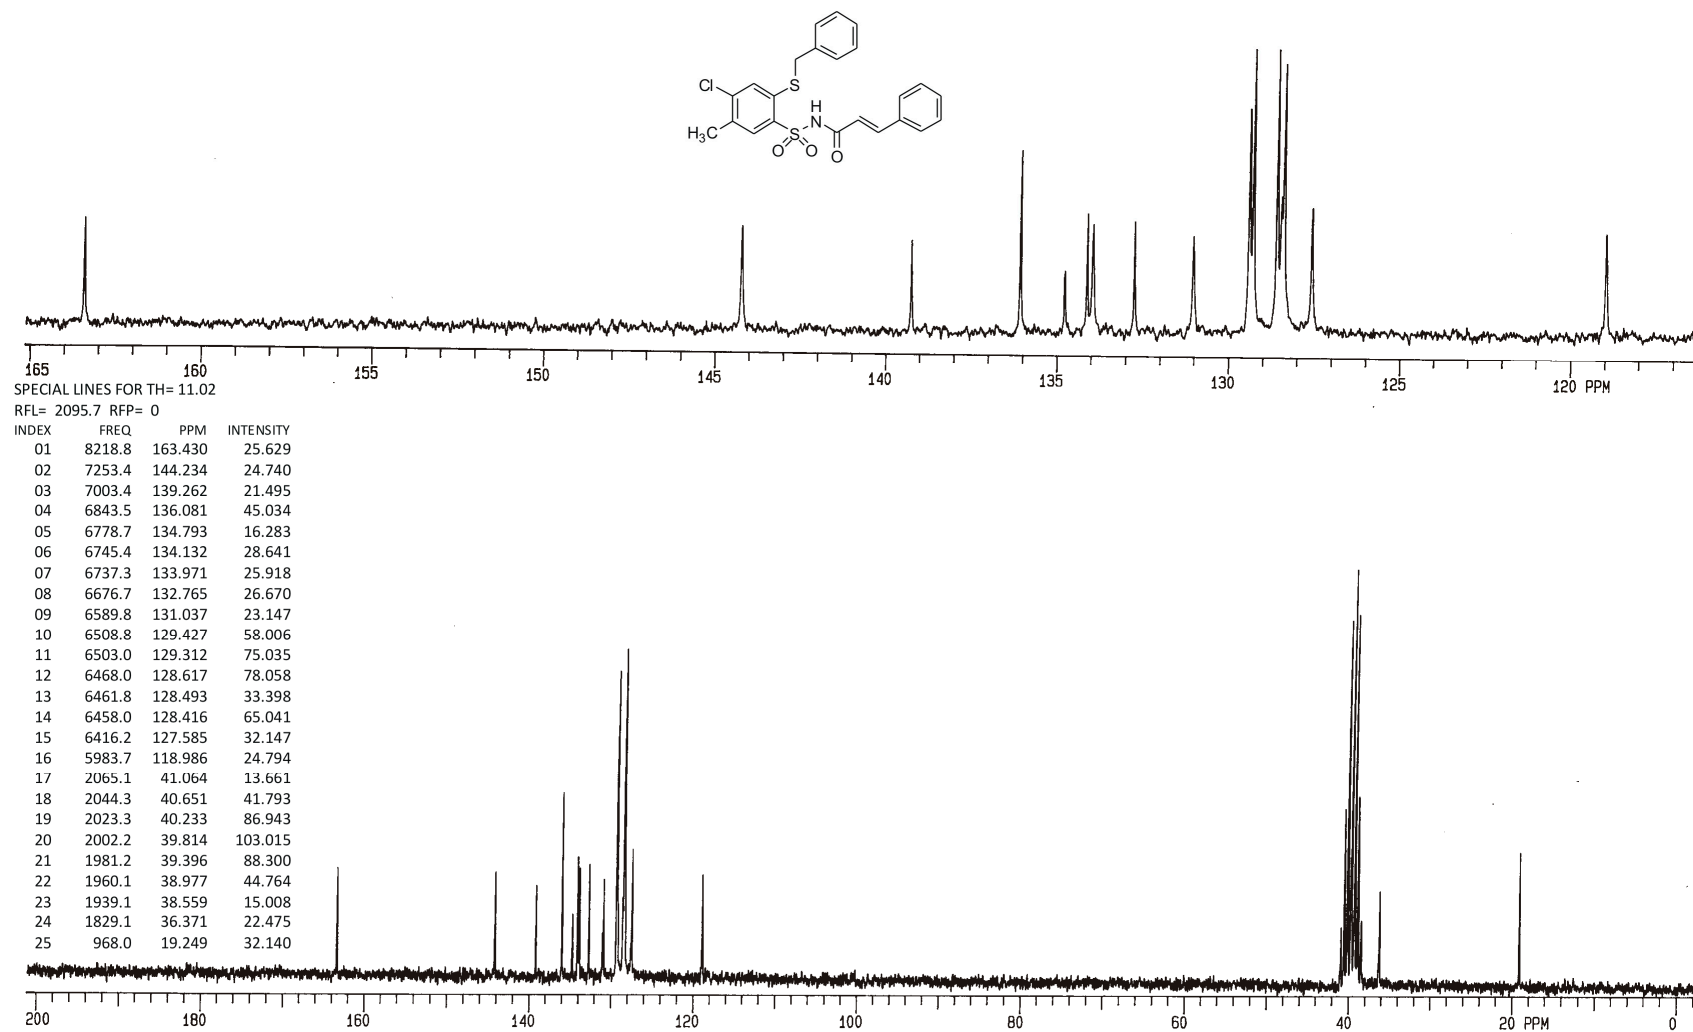

Figure S39.  $^{13}\text{C}$ -NMR of compound **46** (50 MHz,  $\text{DMSO-}d_6$ ).

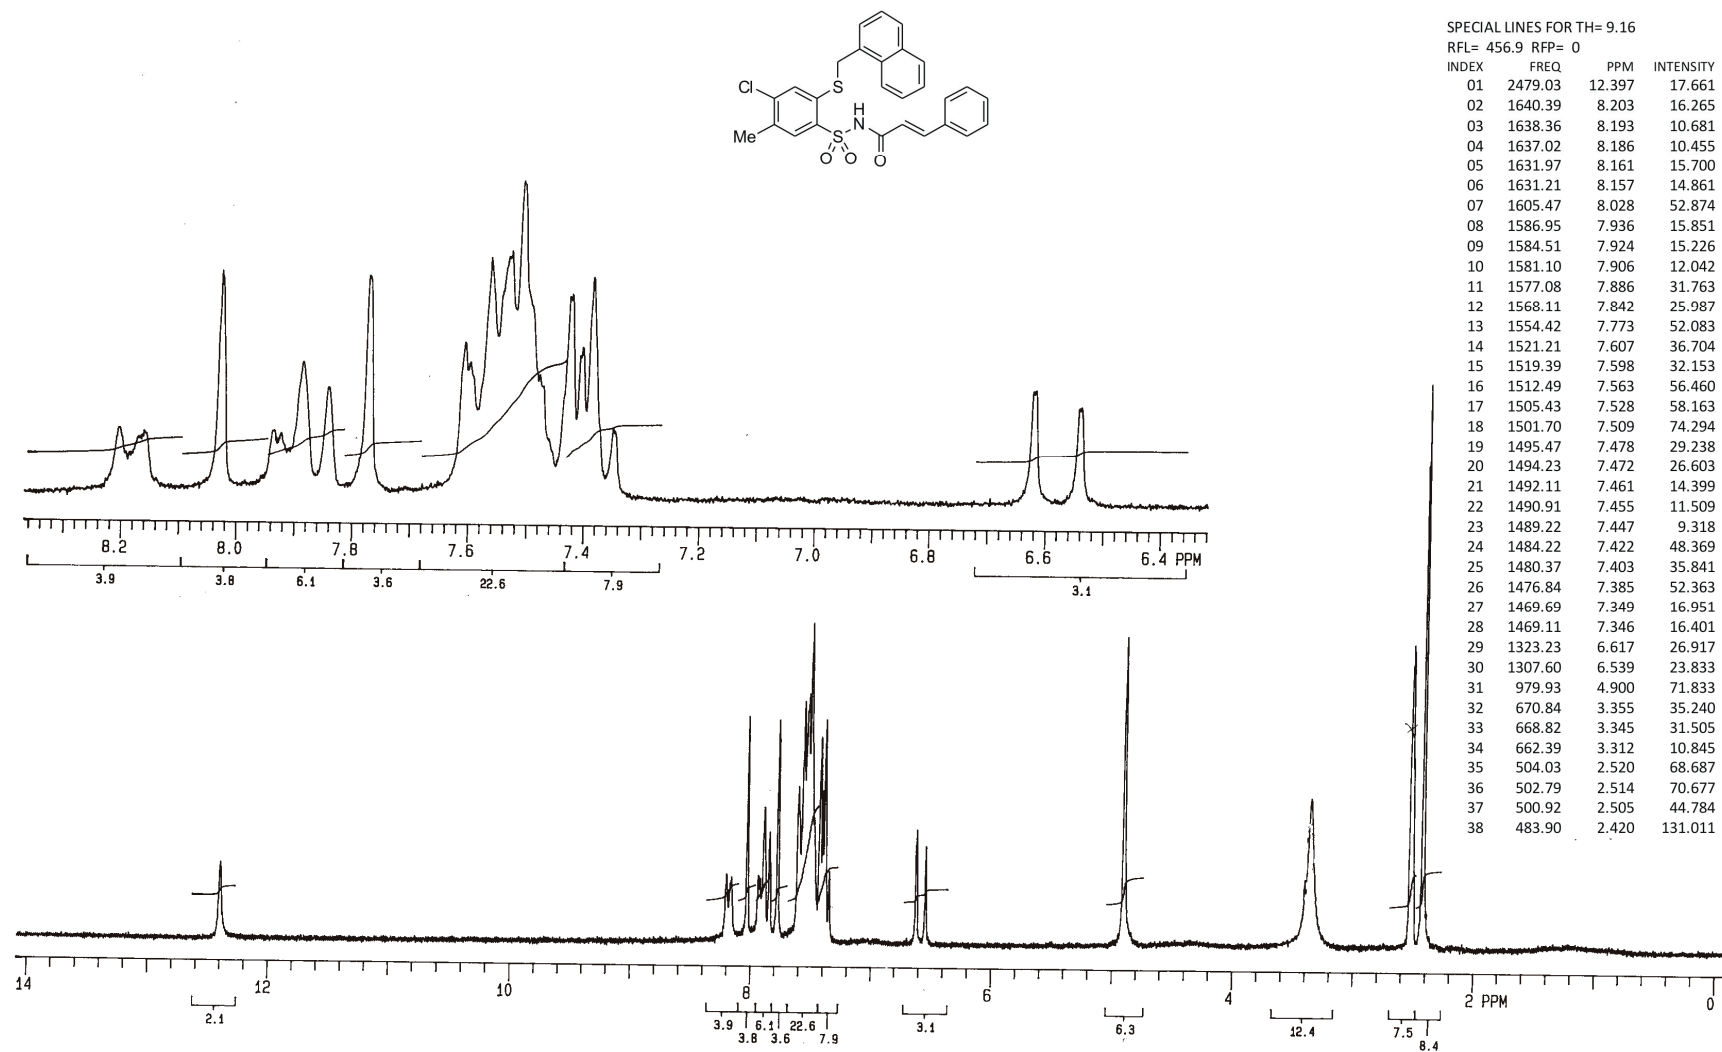

Figure S40.  $^1\text{H-NMR}$  of compound 47 (200 MHz,  $\text{DMSO-}d_6$ ).



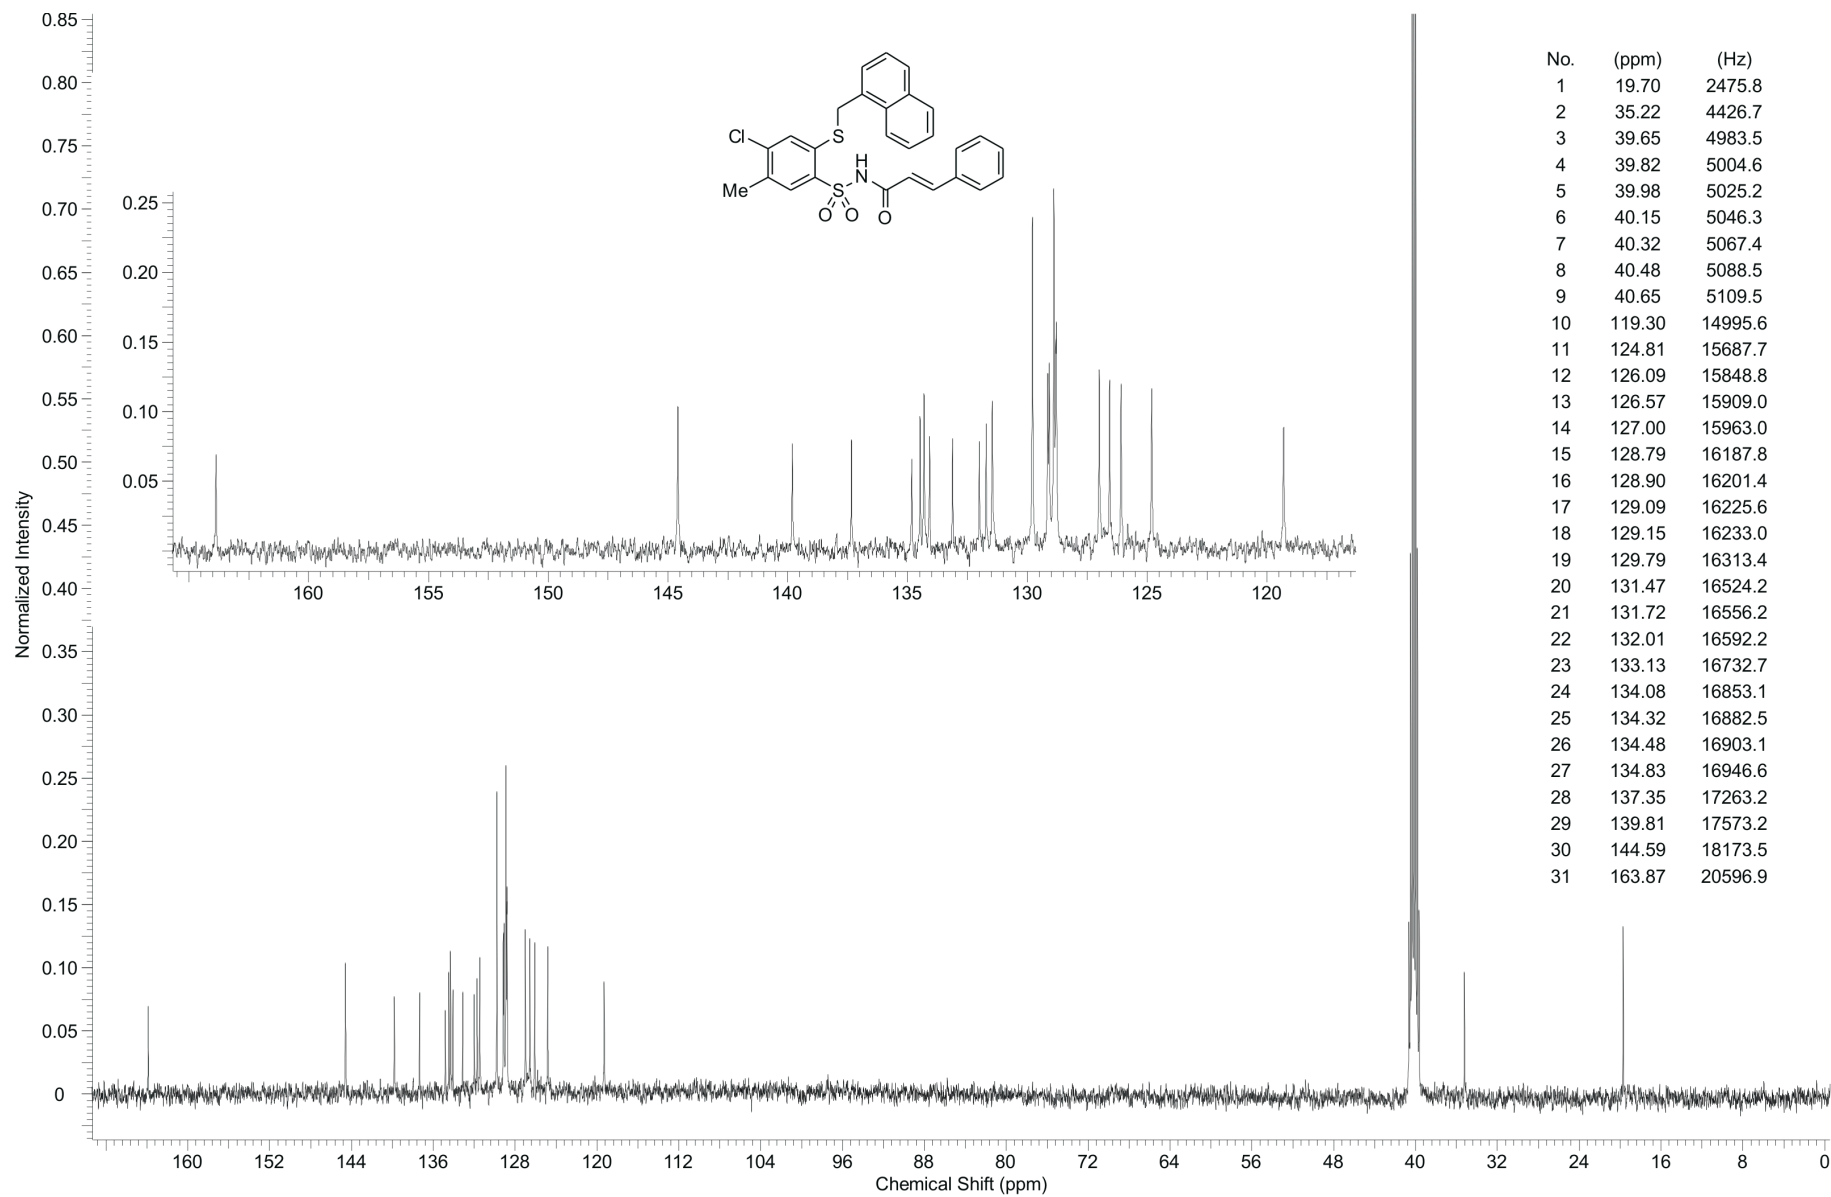

Figure S41.  $^{13}\text{C}$ -NMR of compound 47 (125 MHz,  $\text{DMSO-}d_6$ )
